# Supplementary material
Source: publisher figshare collection journal article supplement (https://tandf.figshare.com/ndownloader/files/13715018)
Supplement: Supplementary file 1 [file 13715018]

Role of a high throughput Biodosimetry test in treatment prioritization after a nuclear incident

Aviva R Jacobsa, Timothy Guyona, Violetta Headleya, Mahalakshmi Naira William Rickettsa, Gerry Grayb, Jeffery Y.C. Wongc, Nelson Chaod and Robert Terbrueggena

aDxTerity Diagnostics, Los Angeles, CA bClinReg Consulting Services, Inc.; cDepartment of Radiation Oncology; City of Hope National Medical Center and Beckman Research Institute. Duarte, CA.

d Dept. of Hematologic Malignancies & Cell Therapy, Duke University, Durham, NC

Address correspondence to:

Aviva Jacobs, Ph.D.,

DxTerity Diagnostics, 19500 S. Rancho Way, Ste. 116,

Rancho Dominguez, CA 90220. E-mail: [aviva@dxterity.com](mailto:aviva@dxterity.com).

The REDI-Dx Biodosimetry Test System is For Investigational Use Only in the USA and CE-IVD marked.

# Supplement

## REDI-Dx Test

Fifty microliters (50 μL) of stabilized blood (1:2 ratio of blood to stabilization buffer) was mixed in a 96-well plate (Corning Inc., Union City, CA) or a 32-well plate (Axygen Scientiﬁc/Corning Inc., Union City, CA) with 15 µL of reaction buffer: 15 µL of a solution that containing S-probes, 15 µL of solution containing L- and TC- probes, and 5 µL of a proteinase solution.

The plates were sealed with 8-well strip caps (Agilent Technologies, Santa Clara, CA) and incubated in a thermocycler (Veriti; Life Technologies, Carlsbad, CA) at 550C, 5 minutes, followed by 10 minutes at 80 0C and then 2 hours and 45 minutes at 550C for the chemical ligation step.

## Target Capture

## After completion of the chemical ligation reaction, 5 µL of 2.8-µm diameter streptavidin-coated paramagnetic beads (DirectBeads) were added to each well and mixed by pipetting. The samples were then incubated for an additional 15 minutes at 55°C to allow binding of the ligation complex to the beads. The plate was removed from the thermal cycler and placed on a 96-well Side Skirted Magnetic Particle Concentrator (Invitrogen, Carlsbad, CA) for 2 minutes to capture the beads to the side of the well. The liquid reaction mixture was aspirated with a multichannel pipette (Rainin, Columbus, OH). The beads were washed three times with 180 μL of wash solution for bead washing steps.

## PCR Amplification

The ligation products were ampliﬁed by PCR without removal from the paramagnetic beads. The forward PCR primers was labeled with a ﬂuorescent dye. A solution containing the Taq DNA polymerase, PCR buffer, dNTPs (Taq solution) and the universal primer mix [600 nmol/L of forward primers: (5’ FAM-GGGTTCCCTAAGGGTTG-3’ , 5’NED-GGATGCTATGAGCGATCTGCAG, and reverse 5’- GTGCCAGCAAGATCCAATCT-3’ PCR primers] were added to the washed beads, and the mixture was ampliﬁed by PCR (2 minutes at 95°C, followed by 30 cycles of 10 seconds at 95***°***C, 20 seconds at 57***°***C, and 20 seconds at 72***°***C).

## CE Analysis

The PCR products were separated by CE and were detected by ﬂuorescence. The PCR product from each target sequence was identiﬁed on the basis of its characteristic length; thus, each was quantiﬁed independently. A 2 µL aliquot of the PCR amplicon was mixed with 17.5 µL of Hi-Di Formamide (ThermoFisher Scientific) and 0.5 µL of GeneScan 600 Liz V2 dye Size Standard (ThermoFisher Scientific) and injected into a 24-capillary array with POP-6 polymer running on a ABI 3500xL Dx Genetic Analyzer with the Fragment Analysis Module (ThermoFisher Scientific) according to the manufacturer’s guidelines. The injection time was 20 seconds was used.

## Data Analysis

The assay includes internal controls for the ligation and PCR reactions, which must pass before a result is reported.

The algorithm computes the ratio between the raw intensity of each response gene and normalizer genes to normalize input and raw signal intensity. The normalization is performed independently for the FAM and NED detection channels. Normalized peaks are used as an input into a proprietary algorithm that estimates the dose in units of Gray (Gy).

| **Condition** | **Inclusion Criteria†** |
| --- | --- |
| Allergy | Hours from exposure to allergen |
| Asthma |  |
| Burn | Total Body Surface Area (TBSA) categories of <10%, 10-20% and >21% |
| COPD | Diagnosed with condition |
| Heart Disease | At least 1 cardiac event |
| High BMI | >25 and >30 BMI |
| Huntington’s Disease | Clinically confirmed diagnosis of Huntington's Parkinson's |
| Ibuprofen or Aspirin | within 3 weeks (at least 200mg) |
| Immunocompromised | Serologically positive; for HIV: CD4 count, Viral Load |
| Inflammatory Bowel Disease (Crohn’s disease, Ulcerative Colitis) | Diagnosed with condition |
| Influenza | Diagnosed with influenza |
| Lactation | Number of months’ post-partum |
| Osteoarthritis | Diagnosed with condition |
| Parkinson’s Disease* | Clinically confirmed diagnosis of Parkinson’s disease |
| Pregnancy | Range of pregnancy states (eg. by month or trimester) |
| Psoriasis | Diagnosed with condition |
| Rheumatoid Arthritis | Active, established disease > 2 years. Request patients with DAS28-CRP scores (>5 and <2.6) |
| Smoking | Verbal |
| Sunburn | Provide time from exposure |
| Trauma | Injury Severity Scale (ISS) categories of 10-14, 15-24 and >25 |
| Type II Diabetes | Provide result of Glycated hemoglobin (A1C) test (≥6.5). Alternatively random (200 mg/dL (11.1 mmol/L) or higher) or fasting blood glucose test( 126 mg/dL (7 mmol/L) or higher). |

Table A Cohort Specific Inclusion Criteria

| **Actual Dose** | **Subjects per Dose** | **Total Samples per Dose** |
| --- | --- | --- |
| 0.0 Gy | 190 | 293 |
| 0.5 Gy | 2 | 6 |
| 1.0 Gy | 12 | 16 |
| 1.5 Gy | 3 | 9 |
| 2.0 Gy | 17 | 56 |
| 3.0 Gy | 5 | 15 |
| 4.0 Gy | 47 | 142 |
| 4.5 Gy | 3 | 9 |
| 6.0 Gy | 36 | 131 |
| 7.0 Gy | 3 | 8 |
| 8.0 Gy | 15 | 52 |
| 10.0 Gy | 11 | 38 |
| Sum | 344 | 775 |

Table B. Tabulation of Subjects and measurements by Actual Dose received for REDI-Dx Accuracy Analysis

| **Observations Per NHP** | **Number of NHPs** |
| --- | --- |
| 1 | 9 |
| 2 | 20 |
| 3 | 10 |
| 4 | 59 |
| 5 | 92 |

Table C. Distribution of number of observations per NHP.

| **Number of Measurements** | **0h** | **24h** | **72h** | **120h** | **168h** | **Number of NHPs** |
| --- | --- | --- | --- | --- | --- | --- |
| 1 | X |  |  |  |  | 9 |
| 2 | X |  | X |  |  | 20 |
| 3 | X |  |  | X | X | 2 |
| 3 | X |  | X | X |  | 2 |
| 3 | X | X |  |  | X | 1 |
| 3 | X | X |  | X |  | 1 |
| 3 | X | X | X |  |  | 4 |
| 4 | X |  | X | X | X | 7 |
| 4 | X | X |  | X | X | 3 |
| 4 | X | X | X |  | X | 20 |
| 4 | X | X | X | X |  | 29 |
| 5 | X | X | X | X | X | 92 |
| TOTAL NHPs per TPI | 190 | 150 | 174 | 136 | 125 |  |

Table D. Tabulation of measurement patterns across Time Post Irradiation (TPI). "X" indicates a measurement at the indicated TPI. The number of NHPs with each measurement pattern is tabulated in the last column. Column totals show the total number of measurements per TPI. 0h indicates a measurement taken prior to irradiation.

|  | **Actual Dose 0-0.5 Gy** | **Actual Dose 0.5-12.0 Gy** | **SUM** |
| --- | --- | --- | --- |
| REDI-Dx 0.0-0.5 Gy | 297 | 1 | 298 |
| REDI-Dx 0.5-12.0 Gy | 2 | 475 | 477 |
| SUM | 299 | 476 | 775 |

Table E. Tabulation of actual absorbed dose > 0.5 Gy vs REDI-Dx > 0.5 Gy.

|  | **Actual Dose 0-2.0 Gy** | **Actual Dose 2.0-12.0 Gy** | **SUM** |
| --- | --- | --- | --- |
| REDI-Dx 0-2.0 Gy | 344 | 6 | 350 |
| REDI-Dx 2.0-12.0 Gy | 36 | 389 | 425 |
| SUM | 380 | 395 | 775 |

Table F. Tabulation of actual absorbed dose > 2.0 Gy vs REDI-Dx >2.0 Gy

|  | **Actual Dose 0-6.0 Gy** | **Actual Dose 6.0-12.0 Gy** | **SUM** |
| --- | --- | --- | --- |
| REDI-Dx 0-6.0 Gy | 568 | 8 | 576 |
| REDI-Dx 6.0-12.0 Gy | 109 | 90 | 199 |
| SUM | 677 | 98 | 775 |

Table G. Tabulation of actual absorbed dose > 6.0 Gy vs REDI-Dx > 6.0 Gy

| **Sample** | **#Result/** | **Mean Estimated Dose (Gy)** | **Repeatability** | | **Between Runs** | | **Between Days** | | **Between Sites** | | **Reproducibility** | |
| --- | --- | --- | --- | --- | --- | --- | --- | --- | --- | --- | --- | --- |
| **#Total** | **SD** | **%CV** | **SD** | **%CV** | **SD** | **%CV** | **SD** | **%CV** | **SD** | **%CV** |
| **S1** | 90/90 | 1.0 | 0.1 | 12.1 | 0.1 | 10.6 | 0.0 | 0.0 | 0.1 | 9.9 | 0.2 | 18.4 |
| **S2** | 90/90 | 1.0 | 0.2 | 14.2 | 0.1 | 5.5 | 0.1 | 6.5 | 0.1 | 6.6 | 0.2 | 17.9 |
| **S3** | 90/90 | 1.5 | 0.1 | 8.5 | 0.2 | 9.7 | 0.0 | 0.0 | 0.1 | 8.8 | 0.2 | 15.1 |
| **S4** | 90/90 | 1.9 | 0.1 | 7.5 | 0.1 | 4.4 | 0.1 | 4.1 | 0.0 | 2.3 | 0.2 | 9.9 |
| **S5** | 90/90 | 2.2 | 0.2 | 9.0 | 0.1 | 6.5 | 0.0 | 0.8 | 0.0 | 1.3 | 0.2 | 11.2 |
| **S6** | 90/90 | 2.8 | 0.2 | 5.8 | 0.1 | 1.7 | 0.0 | 1.0 | 0.0 | 0.0 | 0.2 | 6.0 |
| **S7** | 90/90 | 2.9 | 0.3 | 8.5 | 0.1 | 4.0 | 0.1 | 4.3 | 0.3 | 9.1 | 0.4 | 13.7 |
| **S8** | 90/90 | 3.2 | 0.2 | 7.1 | 0.2 | 5.0 | 0.0 | 0.0 | 0.1 | 1.6 | 0.3 | 8.5 |
| **S9** | 90/90 | 3.2 | 0.4 | 12.1 | 0.1 | 2.9 | 0.2 | 4.8 | 0.0 | 0.0 | 0.4 | 13.1 |
| **S10** | 89/90 | 3.5 | 0.3 | 8.3 | 0.0 | 0.0 | 0.2 | 4.3 | 0.1 | 2.5 | 0.3 | 9.4 |
| **S11** | 90/90 | 4.6 | 0.4 | 8.3 | 0.2 | 3.8 | 0.1 | 3.1 | 0.2 | 4.4 | 0.5 | 10.6 |
| **S12** | 90/90 | 5.0 | 0.6 | 12.8 | 0.3 | 5.3 | 0.3 | 5.7 | 0.0 | 0.0 | 0.7 | 14.8 |
| **S13** | 88/90 | 5.5 | 0.8 | 14.2 | 0.0 | 0.0 | 0.2 | 3.7 | 0.2 | 3.8 | 0.8 | 14.7 |
| **S14** | 90/90 | 5.7 | 0.5 | 8.7 | 0.0 | 0.0 | 0.2 | 4.2 | 0.0 | 0.0 | 0.5 | 9.3 |
| **S15** | 90/90 | 6.3 | 0.6 | 9.4 | 0.1 | 1.4 | 0.3 | 3.8 | 0.0 | 0.0 | 0.6 | 10.1 |
| **S16** | 90/90 | 6.3 | 0.4 | 5.9 | 0.2 | 3.2 | 0.1 | 1.2 | 0.0 | 0.0 | 0.4 | 6.7 |
| **S17** | 89/90 | 6.7 | 0.5 | 6.8 | 0.3 | 4.1 | 0.2 | 3.3 | 0.2 | 2.2 | 0.6 | 8.8 |
| **S18** | 90/90 | 6.9 | 0.9 | 12.6 | 0.0 | 0.0 | 0.4 | 5.7 | 0.0 | 0.0 | 0.9 | 13.3 |
| **S19** | 90/90 | 7.3 | 1.0 | 13.2 | 0.0 | 0.0 | 0.2 | 2.4 | 0.0 | 0.0 | 1.0 | 13 |
| **S20** | 90/90 | 7.7 | 0.4 | 5.3 | 0.3 | 3.8 | 0.2 | 2.5 | 0.0 | 0.0 | 0.5 | 6.8 |
| **S21** | 90/90 | 8.0 | 0.8 | 9.7 | 0.3 | 3.6 | 0.2 | 1.9 | 0.2 | 2.0 | 0.9 | 10.7 |
| **S22** | 85/90 | 8.4 | 0.8 | 8.9 | 0.0 | 0.0 | 0.4 | 4.6 | 0.0 | 0.0 | 0.8 | 9.8 |
| **S23** | 90/90 | 8.5 | 0.5 | 6.3 | 0.2 | 2.4 | 0.3 | 3.3 | 0.2 | 2.0 | 0.7 | 7.7 |
| **S24** | 90/90 | 9.1 | 0.6 | 6.4 | 0.2 | 1.6 | 0.1 | 0.8 | 0.2 | 1.8 | 0.6 | 6.9 |
| **S25** | 90/90 | 10.4 | 1.1 | 10.1 | 0.0 | 0.0 | 0.2 | 2.2 | 0.2 | 1.9 | 1.1 | 10.1 |
| **Mean** | | | | | | | | | | | **0.5** | **11** |

Table H. Multi-center reproducibility and repeatability by variance components analysis by sample

Table Ia and Ib. REDI-Dx Dose Estimates for Human Demographics and Confounders Testing presented in Table 2a and 3

| **Sample ID** | **Sex** | **Race / Ethnicity Group** | **Age** | **Age Group (yrs)** | **Final Dose (Gy)** |
| --- | --- | --- | --- | --- | --- |
| B011657 | M | Caucasian | 33 | 22-39 | 0.0 |
| B011930 | F | African American | 23 | 22-39 | 0.0 |
| B011273 | F | Caucasian | 34 | 22-39 | 0.0 |
| B009573 | F | Caucasian | 55 | 40-64 | 0.0 |
| B017019 | M | Native American | 35 | 22-39 | 0.0 |
| B011922 | F | Caucasian | 33 | 22-39 | 0.0 |
| B009587 | M | Caucasian | 31 | 22-39 | 0.0 |
| B012233 | F | Caucasian | 34 | 22-39 | 0.0 |
| B011770 | F | Caucasian | 25 | 22-39 | 0.0 |
| B011253 | M | Caucasian | 20 | 18-21 | 0.0 |
| B009579 | F | African American | 22 | 22-39 | 0.0 |
| B011955 | M | Hispanic | 31 | 22-39 | 0.0 |
| B011147 | M | Caucasian | 30 | 22-39 | 0.0 |
| B013925 | M | Caucasian | 40 | 40-64 | 0.0 |
| B012240 | F | Caucasian | 25 | 22-39 | 0.0 |
| B015730 | F | African American | 19 | 18-21 | 0.0 |
| B009551 | M | Caucasian | 34 | 22-39 | 0.0 |
| B011754 | M | Caucasian | 20 | 18-21 | 0.0 |
| B017027 | M | Native American | 44 | 40-64 | 0.0 |
| B011885 | M | Caucasian | 32 | 22-39 | 0.0 |
| B011946 | F | Hispanic | 50 | 40-64 | 0.0 |
| B011335 | M | Caucasian | 18 | 18-21 | 0.0 |
| B011263 | M | African American | 48 | 40-64 | 0.0 |
| B016002 | F | Caucasian | 52 | 40-64 | 0.0 |
| B009563 | F | Caucasian | 28 | 22-39 | 0.0 |
| B012235 | F | Caucasian | 26 | 22-39 | 0.0 |
| B011287 | M | Caucasian | 26 | 22-39 | 0.0 |
| B013941 | M | Caucasian | 43 | 40-64 | 0.0 |
| B009569 | F | Caucasian | 63 | 40-64 | 0.0 |
| B011901 | F | Caucasian | 29 | 22-39 | 0.0 |
| B015726 | F | African American | 31 | 22-39 | 0.0 |
| B011627 | M | African American | 20 | 18-21 | 0.0 |
| B011695 | M | African American | 40 | 40-64 | 0.0 |
| B012189 | F | Caucasian | 24 | 22-39 | 0.0 |
| B011940 | M | Hispanic | 29 | 22-39 | 0.0 |
| B011265 | M | Caucasian | 23 | 22-39 | 0.0 |
| B011311 | M | African American | 29 | 22-39 | 0.0 |
| B011177 | F | Caucasian | 27 | 22-39 | 0.0 |
| B011856 | M | Caucasian | 24 | 22-39 | 0.0 |
| B012133 | F | Asian | 45 | 40-64 | 0.0 |
| B012173 | M | Asian | 23 | 22-39 | 0.0 |
| B011926 | F | Caucasian | 23 | 22-39 | 0.0 |
| B011681 | M | Caucasian | 19 | 18-21 | 0.0 |
| B012161 | F | Asian | 45 | 40-64 | 0.0 |
| B011477 | F | Caucasian | 28 | 22-39 | 0.0 |
| B011989 | M | Caucasian | 19 | 18-21 | 0.0 |
| B017003 | F | Native American | 61 | 40-64 | 0.0 |
| B012171 | M | Asian | 27 | 22-39 | 0.0 |
| B015732 | F | African American | 23 | 22-39 | 0.0 |
| B011303 | F | Caucasian | 30 | 22-39 | 0.0 |
| B011876 | F | African American | 26 | 22-39 | 0.0 |
| B011261 | M | African American | 42 | 40-64 | 0.0 |
| B011961 | M | Hispanic | 55 | 40-64 | 0.0 |
| B012117 | F | Caucasian | 45 | 40-64 | 0.0 |
| B011874 | M | African American | 34 | 22-39 | 0.0 |
| B011896 | F | Caucasian | 25 | 22-39 | 0.0 |
| B011906 | M | African American | 40 | 40-64 | 0.0 |
| B011331 | M | African American | 29 | 22-39 | 0.0 |
| B011891 | M | Caucasian | 34 | 22-39 | 0.0 |
| B013959 | F | Caucasian | 45 | 40-64 | 0.0 |
| B011693 | F | Caucasian | 29 | 22-39 | 0.0 |
| B009537 | F | Caucasian | 27 | 22-39 | 0.0 |
| B009603 | M | Asian | 44 | 40-64 | 0.0 |
| B011766 | M | Caucasian | 20 | 18-21 | 0.0 |
| B012207 | F | Hispanic | 51 | 40-64 | 0.0 |
| B011993 | M | Caucasian | 19 | 18-21 | 0.0 |
| B019460 | F | Caucasian | 61 | 40-64 | 0.0 |
| B011923 | M | Caucasian | 24 | 22-39 | 0.0 |
| B012143 | F | Asian | 47 | 40-64 | 0.0 |
| B011669 | F | African American | 25 | 22-39 | 0.0 |
| B011758 | M | Caucasian | 27 | 22-39 | 0.0 |
| B012266 | F | Caucasian | 42 | 40-64 | 0.0 |
| B011991 | M | Caucasian | 43 | 40-64 | 0.0 |
| B012215 | F | Hispanic | 40 | 40-64 | 0.0 |
| B011903 | M | Caucasian | 26 | 22-39 | 0.0 |
| B009567 | M | Caucasian | 55 | 40-64 | 0.0 |
| B011653 | M | African American | 26 | 22-39 | 0.0 |
| B009561 | F | Caucasian | 28 | 22-39 | 0.0 |
| B011289 | F | Caucasian | 40 | 40-64 | 0.0 |
| B012538 | F | Caucasian | 18 | 18-21 | 0.0 |
| B011315 | F | Caucasian | 30 | 22-39 | 0.0 |
| B011333 | M | Caucasian | 29 | 22-39 | 0.0 |
| B012633 | F | Hispanic | 19 | 18-21 | 0.0 |
| B011483 | F | Caucasian | 29 | 22-39 | 0.0 |
| B011655 | F | Caucasian | 21 | 18-21 | 0.0 |
| B012237 | F | Caucasian | 28 | 22-39 | 0.0 |
| B011942 | M | Hispanic | 24 | 22-39 | 0.0 |
| B009553 | M | Caucasian | 52 | 40-64 | 0.0 |
| B009571 | M | African American | 23 | 22-39 | 0.0 |
| B011938 | F | Caucasian | 29 | 22-39 | 0.0 |
| B019468 | M | Caucasian | 68 | 65+ | 0.0 |
| B011379 | M | African American | 43 | 40-64 | 0.0 |
| B011223 | M | Caucasian | 36 | 22-39 | 0.0 |
| B016995 | F | Native American | 60 | 40-64 | 0.0 |
| B012205 | F | Hispanic | 21 | 18-21 | 0.0 |
| B011213 | F | African American | 41 | 40-64 | 0.0 |
| B011163 | M | African American | 23 | 22-39 | 0.0 |
| B011675 | M | Caucasian | 31 | 22-39 | 0.0 |
| B011381 | F | Caucasian | 31 | 22-39 | 0.0 |
| B012615 | F | Hispanic | 27 | 22-39 | 0.0 |
| B011756 | F | Caucasian | 36 | 22-39 | 0.0 |
| B011661 | F | Caucasian | 34 | 22-39 | 0.0 |
| B011880 | F | Caucasian | 27 | 22-39 | 0.0 |
| B012151 | F | Asian | 70 | 65+ | 0.0 |
| B012223 | F | Hispanic | 21 | 18-21 | 0.0 |
| B009549 | M | Caucasian | 32 | 22-39 | 0.0 |
| B012258 | F | Caucasian | 44 | 40-64 | 0.0 |
| B012159 | F | Asian | 54 | 40-64 | 0.0 |
| B011952 | M | Hispanic | 29 | 22-39 | 0.0 |
| B011435 | F | Caucasian | 28 | 22-39 | 0.0 |
| B012183 | F | Caucasian | 33 | 22-39 | 0.0 |
| B011203 | M | Caucasian | 32 | 22-39 | 0.0 |
| B011943 | M | Hispanic | 54 | 40-64 | 0.0 |
| B009629 | M | African American | 53 | 40-64 | 0.0 |
| B011375 | F | African American | 19 | 18-21 | 0.0 |
| B009541 | M | Hispanic | 26 | 22-39 | 0.0 |
| B011884 | M | Caucasian | 21 | 18-21 | 0.0 |
| B011857 | M | African American | 46 | 40-64 | 0.0 |
| B011225 | M | Caucasian | 25 | 22-39 | 0.0 |
| B012107 | M | Caucasian | 18 | 18-21 | 0.0 |
| B014199 | F | Caucasian | 63 | 40-64 | 0.0 |
| B012239 | F | Caucasian | 34 | 22-39 | 0.0 |
| B017891 | F | Caucasian | 20 | 18-21 | 0.0 |
| B011459 | F | African American | 32 | 22-39 | 0.0 |
| B012131 | M | Asian | 24 | 22-39 | 0.0 |
| B011285 | M | African American | 29 | 22-39 | 0.0 |
| B011038 | M | Hispanic | 55 | 40-64 | 0.0 |
| B011243 | M | Caucasian | 26 | 22-39 | 0.0 |
| B011251 | F | African American | 42 | 40-64 | 0.0 |
| B011768 | M | Caucasian | 27 | 22-39 | 0.0 |
| B011858 | M | Caucasian | 24 | 22-39 | 0.0 |
| B012157 | M | Asian | 59 | 40-64 | 0.0 |
| B011305 | M | African American | 26 | 22-39 | 0.0 |
| B012145 | M | Asian | 55 | 40-64 | 0.0 |
| B009565 | F | Caucasian | 53 | 40-64 | 0.0 |
| B011159 | M | Caucasian | 37 | 22-39 | 0.0 |
| B011197 | M | African American | 26 | 22-39 | 0.0 |
| B011048 | F | Hispanic | 29 | 22-39 | 0.0 |
| B011411 | M | Caucasian | 37 | 22-39 | 0.0 |
| B013955 | F | Caucasian | 45 | 40-64 | 0.0 |
| B011227 | M | African American | 24 | 22-39 | 0.0 |
| B011357 | F | Caucasian | 40 | 40-64 | 0.0 |
| B013943 | F | Caucasian | 43 | 40-64 | 0.0 |
| B015700 | F | Caucasian | 25 | 22-39 | 0.0 |
| B011409 | F | Caucasian | 27 | 22-39 | 0.0 |
| B009545 | M | Caucasian | 20 | 18-21 | 0.0 |
| B011297 | F | Caucasian | 34 | 22-39 | 0.0 |
| B015720 | F | Caucasian | 40 | 40-64 | 0.0 |
| B011393 | M | African American | 22 | 22-39 | 0.0 |
| B015996 | F | Caucasian | 41 | 40-64 | 0.0 |
| B011139 | M | Caucasian | 19 | 18-21 | 0.0 |
| B011211 | F | Caucasian | 23 | 22-39 | 0.0 |
| B011629 | F | Caucasian | 19 | 18-21 | 0.0 |
| B011281 | F | African American | 28 | 22-39 | 0.0 |
| B011319 | M | African American | 31 | 22-39 | 0.0 |
| B011889 | M | Caucasian | 29 | 22-39 | 0.0 |
| B011778 | M | Caucasian | 27 | 22-39 | 0.0 |
| B009557 | F | Caucasian | 21 | 18-21 | 0.0 |
| B011347 | F | Caucasian | 29 | 22-39 | 0.0 |
| B011377 | M | Caucasian | 26 | 22-39 | 0.0 |
| B009483 | F | Caucasian | 56 | 40-64 | 0.0 |
| B011967 | M | Hispanic | 38 | 22-39 | 0.0 |
| B011403 | M | Caucasian | 27 | 22-39 | 0.0 |
| B009577 | M | African American | 52 | 40-64 | 0.0 |
| B011279 | M | African American | 33 | 22-39 | 0.0 |
| B018404 | M | Caucasian | 73 | 65+ | 0.0 |
| B011866 | F | African American | 20 | 18-21 | 0.0 |
| B011487 | M | African American | 45 | 40-64 | 0.0 |
| B011467 | F | Caucasian | 27 | 22-39 | 0.0 |
| B011195 | F | Caucasian | 34 | 22-39 | 0.0 |
| B011391 | F | Caucasian | 34 | 22-39 | 0.0 |
| B011217 | M | African American | 25 | 22-39 | 0.0 |
| B012129 | F | Caucasian | 65 | 65+ | 0.0 |
| B011963 | M | Hispanic | 39 | 22-39 | 0.0 |
| B017015 | M | Native American | 29 | 22-39 | 0.0 |
| B012556 | F | Caucasian | 40 | 40-64 | 0.0 |
| B011421 | F | Caucasian | 25 | 22-39 | 0.0 |
| B019560 | F | Caucasian | 66 | 65+ | 0.0 |
| B011663 | F | Caucasian | 31 | 22-39 | 0.0 |
| B016942 | M | Caucasian | 64 | 40-64 | 0.0 |
| B019532 | F | Caucasian | 61 | 40-64 | 0.0 |
| B011944 | M | Hispanic | 58 | 40-64 | 0.0 |
| B011171 | M | Caucasian | 32 | 22-39 | 0.0 |
| B011189 | M | Caucasian | 25 | 22-39 | 0.0 |
| B009595 | M | Caucasian | 64 | 40-64 | 0.0 |
| B011633 | F | African American | 27 | 22-39 | 0.0 |
| B012125 | F | Caucasian | 56 | 40-64 | 0.0 |
| B016962 | F | Caucasian | 74 | 65+ | 0.0 |
| B012121 | M | Caucasian | 42 | 40-64 | 0.0 |
| B016946 | F | Caucasian | 64 | 40-64 | 0.0 |
| B012250 | M | Caucasian | 53 | 40-64 | 0.0 |
| B012167 | M | Asian | 20 | 18-21 | 0.0 |
| B012219 | F | Hispanic | 53 | 40-64 | 0.0 |
| B012252 | M | Caucasian | 57 | 40-64 | 0.0 |
| B011855 | M | African American | 37 | 22-39 | 0.0 |
| B011301 | F | Caucasian | 33 | 22-39 | 0.0 |
| B012225 | F | Hispanic | 20 | 18-21 | 0.0 |
| B017059 | F | Native American | 50 | 40-64 | 0.0 |
| B011977 | M | Hispanic | 37 | 22-39 | 0.0 |
| B011209 | F | Caucasian | 34 | 22-39 | 0.0 |
| B011968 | M | Hispanic | 18 | 18-21 | 0.0 |
| B011979 | M | Hispanic | 24 | 22-39 | 0.0 |
| B016954 | M | Caucasian | 66 | 65+ | 0.0 |
| B011371 | M | Caucasian | 27 | 22-39 | 0.0 |
| B012127 | M | Caucasian | 61 | 40-64 | 0.0 |
| B011040 | M | Hispanic | 47 | 40-64 | 0.0 |
| B012155 | M | Asian | 18 | 18-21 | 0.0 |
| B015980 | F | Caucasian | 41 | 40-64 | 0.0 |
| B011363 | M | African American | 33 | 22-39 | 0.0 |
| B017011 | F | Native American | 55 | 40-64 | 0.0 |
| B011457 | M | Caucasian | 23 | 22-39 | 0.0 |
| B011275 | M | Caucasian | 32 | 22-39 | 0.0 |
| B017055 | M | Native American | 38 | 22-39 | 0.0 |
| B012135 | M | Asian | 20 | 18-21 | 0.0 |
| B011491 | F | Caucasian | 22 | 22-39 | 0.0 |
| B011683 | M | Caucasian | 33 | 22-39 | 0.0 |
| B011863 | M | Caucasian | 27 | 22-39 | 0.0 |
| B012552 | M | Caucasian | 48 | 40-64 | 0.0 |
| B011984 | M | Caucasian | 19 | 18-21 | 0.0 |
| B012554 | M | Caucasian | 59 | 40-64 | 0.0 |
| B016999 | F | Native American | 38 | 22-39 | 0.0 |
| B016000 | F | Caucasian | 57 | 40-64 | 0.0 |
| B011887 | F | Caucasian | 31 | 22-39 | 0.0 |
| B011417 | M | Caucasian | 37 | 22-39 | 0.0 |
| B009627 | F | African American | 62 | 40-64 | 0.0 |
| B011339 | M | Caucasian | 26 | 22-39 | 0.0 |
| B013927 | F | Caucasian | 40 | 40-64 | 0.0 |
| B011643 | M | Caucasian | 20 | 18-21 | 0.0 |
| B012243 | M | Caucasian | 20 | 18-21 | 0.0 |
| B011499 | M | Caucasian | 35 | 22-39 | 0.0 |
| B012201 | F | Hispanic | 29 | 22-39 | 0.0 |
| B016958 | F | Caucasian | 59 | 40-64 | 0.0 |
| B011872 | M | African American | 21 | 18-21 | 0.0 |
| B009535 | M | Caucasian | 41 | 40-64 | 0.0 |
| B012177 | F | Caucasian | 35 | 22-39 | 0.0 |
| B011056 | F | Hispanic | 21 | 18-21 | 0.0 |
| B011974 | M | Hispanic | 55 | 40-64 | 0.0 |
| B011277 | F | Caucasian | 25 | 22-39 | 0.0 |
| B011465 | M | Caucasian | 34 | 22-39 | 0.0 |
| B011293 | M | Caucasian | 30 | 22-39 | 0.0 |
| B011429 | F | Caucasian | 32 | 22-39 | 0.0 |
| B011050 | M | Hispanic | 25 | 22-39 | 0.0 |
| B016012 | F | Caucasian | 47 | 40-64 | 0.0 |
| B011893 | F | Caucasian | 27 | 22-39 | 0.0 |
| B011673 | F | Caucasian | 33 | 22-39 | 0.0 |
| B011912 | F | African American | 31 | 22-39 | 0.0 |
| B011953 | M | Hispanic | 48 | 40-64 | 0.0 |
| B011928 | M | African American | 52 | 40-64 | 0.0 |
| B012211 | F | Hispanic | 28 | 22-39 | 0.0 |
| B017039 | F | Native American | 21 | 18-21 | 0.0 |
| B011772 | F | Caucasian | 38 | 22-39 | 0.0 |
| B014223 | M | Caucasian | 61 | 40-64 | 0.0 |
| B011237 | F | Caucasian | 34 | 22-39 | 0.0 |
| B011495 | F | Caucasian | 24 | 22-39 | 0.0 |
| B012165 | F | Asian | 72 | 65+ | 0.0 |
| B012000 | F | Caucasian | 44 | 40-64 | 0.0 |
| B011469 | M | Caucasian | 33 | 22-39 | 0.0 |
| B011345 | M | African American | 24 | 22-39 | 0.0 |
| B011917 | M | Caucasian | 19 | 18-21 | 0.0 |
| B011355 | F | Caucasian | 31 | 22-39 | 0.0 |
| B011703 | F | Caucasian | 28 | 22-39 | 0.0 |
| B011699 | M | African American | 27 | 22-39 | 0.0 |
| B011960 | M | Hispanic | 31 | 22-39 | 0.0 |
| B019480 | F | Caucasian | 66 | 65+ | 0.0 |
| B015728 | F | African American | 23 | 22-39 | 0.0 |
| B017051 | M | Native American | 38 | 22-39 | 0.0 |
| B009591 | F | Caucasian | 47 | 40-64 | 0.0 |
| B011711 | M | Caucasian | 27 | 22-39 | 0.0 |
| B011981 | M | Caucasian | 40 | 40-64 | 0.0 |
| B009605 | M | Hispanic | 29 | 22-39 | 0.0 |
| B011155 | F | Caucasian | 27 | 22-39 | 0.0 |
| B019540 | F | Caucasian | 60 | 40-64 | 0.0 |
| B011415 | M | African American | 54 | 40-64 | 0.0 |
| B011221 | F | Caucasian | 30 | 22-39 | 0.0 |
| B019476 | M | Caucasian | 64 | 40-64 | 0.0 |
| B009617 | F | Caucasian | 48 | 40-64 | 0.0 |
| B011679 | M | Caucasian | 39 | 22-39 | 0.0 |
| B012113 | M | Caucasian | 49 | 40-64 | 0.0 |
| B011387 | M | Caucasian | 19 | 18-21 | 0.0 |
| B011385 | F | African American | 28 | 22-39 | 0.0 |
| B011994 | F | Caucasian | 46 | 40-64 | 0.0 |
| B015702 | F | Caucasian | 38 | 22-39 | 0.0 |
| B011909 | F | Caucasian | 32 | 22-39 | 0.0 |
| B015784 | F | Caucasian | 66 | 65+ | 0.0 |
| B011888 | F | Caucasian | 37 | 22-39 | 0.0 |
| B011764 | F | Caucasian | 33 | 22-39 | 0.0 |
| B011383 | M | Caucasian | 20 | 18-21 | 0.0 |
| B012546 | M | Caucasian | 42 | 40-64 | 0.0 |
| B016991 | F | Native American | 78 | 65+ | 0.0 |
| B011455 | M | Caucasian | 39 | 22-39 | 0.0 |
| B014219 | M | Caucasian | 61 | 40-64 | 0.0 |
| B009539 | F | Caucasian | 29 | 22-39 | 0.0 |
| B011257 | F | African American | 58 | 40-64 | 0.0 |
| B009619 | M | African American | 36 | 22-39 | 0.0 |
| B011976 | M | Hispanic | 20 | 18-21 | 0.0 |
| B014151 | M | Caucasian | 59 | 40-64 | 0.0 |
| B011149 | F | African American | 25 | 22-39 | 0.0 |
| B011044 | M | Hispanic | 59 | 40-64 | 0.0 |
| B011463 | F | Caucasian | 31 | 22-39 | 0.0 |
| B012221 | F | Hispanic | 49 | 40-64 | 0.0 |
| B011255 | M | Caucasian | 24 | 22-39 | 0.0 |
| B011995 | M | Caucasian | 47 | 40-64 | 0.0 |
| B011860 | M | Caucasian | 19 | 18-21 | 0.0 |
| B011433 | F | Caucasian | 39 | 22-39 | 0.0 |
| B011647 | F | Caucasian | 29 | 22-39 | 0.0 |
| B013917 | M | Caucasian | 40 | 40-64 | 0.0 |
| B012195 | F | Hispanic | 40 | 40-64 | 0.0 |
| B011649 | M | Caucasian | 22 | 22-39 | 0.0 |
| B011373 | F | African American | 21 | 18-21 | 0.0 |
| B011349 | M | Caucasian | 27 | 22-39 | 0.0 |
| B011046 | M | Hispanic | 25 | 22-39 | 0.0 |
| B019488 | F | Caucasian | 65 | 65+ | 0.0 |
| B011902 | M | Caucasian | 35 | 22-39 | 0.0 |
| B012637 | F | Hispanic | 24 | 22-39 | 0.0 |
| B011962 | M | Hispanic | 54 | 40-64 | 0.0 |
| B011873 | F | Caucasian | 25 | 22-39 | 0.0 |
| B012629 | F | Hispanic | 31 | 22-39 | 0.0 |
| B011868 | M | African American | 24 | 22-39 | 0.0 |
| B011231 | M | African American | 21 | 18-21 | 0.0 |
| B009651 | F | Hispanic | 23 | 22-39 | 0.0 |
| B011399 | M | Caucasian | 35 | 22-39 | 0.0 |
| B011776 | F | Caucasian | 34 | 22-39 | 0.0 |
| B011447 | F | African American | 26 | 22-39 | 0.0 |
| B011341 | F | Caucasian | 25 | 22-39 | 0.0 |
| B011986 | M | Caucasian | 19 | 18-21 | 0.0 |
| B011299 | M | Caucasian | 32 | 22-39 | 0.0 |
| B011659 | M | African American | 40 | 40-64 | 0.0 |
| B012203 | F | Hispanic | 46 | 40-64 | 0.0 |
| B011052 | F | Hispanic | 39 | 22-39 | 0.0 |
| B011175 | M | African American | 24 | 22-39 | 0.0 |
| B011283 | F | Caucasian | 34 | 22-39 | 0.0 |
| B011956 | M | Hispanic | 48 | 40-64 | 0.0 |
| B013919 | M | Caucasian | 41 | 40-64 | 0.0 |
| B013923 | F | Caucasian | 40 | 40-64 | 0.0 |
| B011671 | F | Caucasian | 27 | 22-39 | 0.0 |
| B015704 | F | Caucasian | 27 | 22-39 | 0.0 |
| B011245 | M | Caucasian | 22 | 22-39 | 0.0 |
| B014171 | M | Caucasian | 60 | 40-64 | 0.0 |
| B011219 | F | Caucasian | 35 | 22-39 | 0.0 |
| B012111 | F | Caucasian | 47 | 40-64 | 0.0 |
| B011966 | M | Hispanic | 29 | 22-39 | 0.0 |
| B011992 | M | Caucasian | 67 | 65+ | 0.0 |
| B012139 | F | Asian | 60 | 40-64 | 0.0 |
| B012119 | F | Caucasian | 43 | 40-64 | 0.0 |
| B012621 | F | Hispanic | 32 | 22-39 | 0.0 |
| B009593 | F | African American | 27 | 22-39 | 0.0 |
| B011185 | F | Caucasian | 27 | 22-39 | 0.0 |
| B011369 | M | Caucasian | 40 | 40-64 | 0.0 |
| B018444 | M | Caucasian | 65 | 65+ | 0.0 |
| B011423 | M | Caucasian | 25 | 22-39 | 0.0 |
| B012209 | F | Hispanic | 38 | 22-39 | 0.0 |
| B011950 | M | Hispanic | 45 | 40-64 | 0.0 |
| B012256 | M | Caucasian | 47 | 40-64 | 0.0 |
| B011267 | F | Caucasian | 29 | 22-39 | 0.0 |
| B011954 | M | Hispanic | 21 | 18-21 | 0.0 |
| B011947 | M | Hispanic | 56 | 40-64 | 0.0 |
| B011914 | M | Caucasian | 30 | 22-39 | 0.0 |
| B011165 | M | African American | 26 | 22-39 | 0.0 |
| B011886 | M | African American | 43 | 40-64 | 0.0 |
| B012540 | M | Caucasian | 18 | 18-21 | 0.0 |
| B011291 | F | African American | 35 | 22-39 | 0.0 |
| B011865 | F | Caucasian | 23 | 22-39 | 0.0 |
| B011193 | F | Caucasian | 19 | 18-21 | 0.0 |
| B011931 | F | Caucasian | 36 | 22-39 | 0.0 |
| B011397 | M | Caucasian | 27 | 22-39 | 0.0 |
| B009485 | M | Caucasian | 49 | 40-64 | 0.0 |
| B019492 | F | Caucasian | 60 | 40-64 | 0.0 |
| B011437 | M | Caucasian | 30 | 22-39 | 0.0 |
| B011337 | M | Caucasian | 19 | 18-21 | 0.0 |
| B011883 | M | African American | 59 | 40-64 | 0.0 |
| B011867 | F | Caucasian | 27 | 22-39 | 0.0 |
| B011964 | M | Hispanic | 31 | 22-39 | 0.0 |
| B011481 | M | African American | 26 | 22-39 | 0.0 |
| B012217 | F | Hispanic | 39 | 22-39 | 0.0 |
| B011697 | F | Caucasian | 18 | 18-21 | 0.0 |
| B012268 | M | Caucasian | 49 | 40-64 | 0.0 |
| B019544 | F | Caucasian | 74 | 65+ | 0.0 |
| B011161 | F | Caucasian | 25 | 22-39 | 0.0 |
| B011951 | M | Hispanic | 51 | 40-64 | 0.0 |
| B011916 | M | Caucasian | 31 | 22-39 | 0.0 |
| B011329 | F | African American | 29 | 22-39 | 0.0 |
| B011978 | M | Hispanic | 38 | 22-39 | 0.0 |
| B011461 | M | Caucasian | 24 | 22-39 | 0.0 |
| B011701 | M | African American | 33 | 22-39 | 0.0 |
| B012262 | F | Caucasian | 56 | 40-64 | 0.0 |
| B009597 | F | African American | 41 | 40-64 | 0.0 |
| B011389 | M | Caucasian | 36 | 22-39 | 0.0 |
| B011677 | M | African American | 32 | 22-39 | 0.0 |
| B011309 | M | African American | 27 | 22-39 | 0.0 |
| B011760 | F | Caucasian | 33 | 22-39 | 0.0 |
| B011639 | M | African American | 52 | 40-64 | 0.0 |
| B012254 | M | Caucasian | 42 | 40-64 | 0.0 |
| B012199 | F | Hispanic | 51 | 40-64 | 0.0 |
| B016008 | F | Caucasian | 44 | 40-64 | 0.0 |
| B012191 | F | Hispanic | 43 | 40-64 | 0.0 |
| B012179 | F | Caucasian | 35 | 22-39 | 0.0 |
| B011191 | F | Caucasian | 36 | 22-39 | 0.0 |
| B015714 | F | Caucasian | 24 | 22-39 | 0.0 |
| B011882 | M | Caucasian | 28 | 22-39 | 0.0 |
| B011173 | F | Caucasian | 30 | 22-39 | 0.0 |
| B012542 | M | Caucasian | 48 | 40-64 | 0.0 |
| B015986 | F | Caucasian | 48 | 40-64 | 0.0 |
| B016930 | F | Caucasian | 61 | 40-64 | 0.0 |
| B011959 | M | Hispanic | 42 | 40-64 | 0.0 |
| B014187 | M | Caucasian | 72 | 65+ | 0.0 |
| B012197 | F | Hispanic | 34 | 22-39 | 0.0 |
| B011153 | M | Caucasian | 18 | 18-21 | 0.0 |
| B009585 | F | Caucasian | 52 | 40-64 | 0.0 |
| B011401 | M | Caucasian | 36 | 22-39 | 0.0 |
| B014231 | M | Caucasian | 61 | 40-64 | 0.0 |
| B011988 | M | Caucasian | 45 | 40-64 | 0.0 |
| B016006 | F | Caucasian | 56 | 40-64 | 0.0 |
| B011269 | M | Caucasian | 38 | 22-39 | 0.0 |
| B011351 | M | Caucasian | 28 | 22-39 | 0.0 |
| B011869 | M | African American | 42 | 40-64 | 0.0 |
| B011449 | M | Caucasian | 38 | 22-39 | 0.0 |
| B011877 | M | Caucasian | 25 | 22-39 | 0.0 |
| B011215 | M | African American | 39 | 22-39 | 0.0 |
| B011691 | M | Caucasian | 35 | 22-39 | 0.0 |
| B011054 | F | Hispanic | 41 | 40-64 | 0.0 |
| B012181 | F | Caucasian | 36 | 22-39 | 0.0 |
| B011980 | M | Caucasian | 54 | 40-64 | 0.0 |
| B012548 | M | Caucasian | 42 | 40-64 | 0.0 |
| B011325 | M | Caucasian | 30 | 22-39 | 0.0 |
| B012227 | F | Hispanic | 46 | 40-64 | 0.0 |
| B011485 | M | African American | 31 | 22-39 | 0.0 |
| B012175 | F | Caucasian | 37 | 22-39 | 0.0 |
| B011359 | F | Caucasian | 26 | 22-39 | 0.0 |
| B011973 | M | Hispanic | 52 | 40-64 | 0.0 |
| B011774 | M | Caucasian | 27 | 22-39 | 0.0 |
| B011879 | M | African American | 42 | 40-64 | 0.0 |
| B018400 | F | Caucasian | 79 | 65+ | 0.0 |
| B012635 | F | Hispanic | 29 | 22-39 | 0.0 |
| B011233 | M | Caucasian | 22 | 22-39 | 0.0 |
| B015716 | M | Caucasian | 28 | 22-39 | 0.0 |
| B011137 | M | Caucasian | 35 | 22-39 | 0.0 |
| B011983 | F | Caucasian | 51 | 40-64 | 0.0 |
| B011892 | M | Caucasian | 22 | 22-39 | 0.0 |
| B011207 | M | Caucasian | 29 | 22-39 | 0.0 |
| B011249 | M | African American | 36 | 22-39 | 0.0 |
| B009601 | M | Hispanic | 36 | 22-39 | 0.0 |
| B012185 | F | Caucasian | 21 | 18-21 | 0.0 |
| B019484 | F | Caucasian | 66 | 65+ | 0.0 |
| B018412 | F | Caucasian | 69 | 65+ | 0.0 |
| B011365 | M | African American | 50 | 40-64 | 0.0 |
| B011934 | M | African American | 24 | 22-39 | 0.0 |
| B009599 | M | Caucasian | 33 | 22-39 | 0.0 |
| B011327 | M | Caucasian | 38 | 22-39 | 0.0 |
| B011471 | M | Caucasian | 25 | 22-39 | 0.0 |
| B011949 | M | Hispanic | 50 | 40-64 | 0.0 |
| B011427 | M | African American | 38 | 22-39 | 0.0 |
| B011782 | M | Caucasian | 37 | 22-39 | 0.0 |
| B011475 | M | African American | 28 | 22-39 | 0.0 |
| B009607 | M | Caucasian | 65 | 65+ | 0.0 |
| B011752 | F | Caucasian | 22 | 22-39 | 0.0 |
| B011907 | F | Caucasian | 28 | 22-39 | 0.0 |
| B019500 | M | Caucasian | 60 | 40-64 | 0.0 |
| B012187 | F | Caucasian | 32 | 22-39 | 0.0 |
| B018376 | M | Caucasian | 77 | 65+ | 0.0 |
| B017047 | F | Native American | 50 | 40-64 | 0.0 |
| B012550 | F | Caucasian | 40 | 40-64 | 0.0 |
| B011183 | M | Caucasian | 21 | 18-21 | 0.0 |
| B011445 | M | African American | 33 | 22-39 | 0.0 |
| B009621 | F | African American | 58 | 40-64 | 0.0 |
| B011709 | M | Caucasian | 19 | 18-21 | 0.0 |
| B011651 | M | Caucasian | 28 | 22-39 | 0.0 |
| B011641 | M | African American | 32 | 22-39 | 0.0 |
| B011343 | M | African American | 26 | 22-39 | 0.0 |
| B011201 | M | Caucasian | 35 | 22-39 | 0.0 |
| B011441 | M | African American | 33 | 22-39 | 0.0 |
| B009623 | M | Caucasian | 48 | 40-64 | 0.0 |
| B011985 | M | Caucasian | 54 | 40-64 | 0.0 |
| B011878 | M | African American | 37 | 22-39 | 0.0 |
| B016934 | F | Caucasian | 66 | 65+ | 0.0 |
| B011145 | M | African American | 31 | 22-39 | 0.0 |
| B011307 | M | African American | 56 | 40-64 | 0.0 |
| B011890 | M | Caucasian | 29 | 22-39 | 0.0 |
| B015752 | F | Caucasian | 65 | 65+ | 0.0 |
| B019528 | F | Caucasian | 66 | 65+ | 0.0 |
| B011431 | M | Caucasian | 40 | 40-64 | 0.0 |
| B011323 | M | African American | 43 | 40-64 | 0.0 |
| B012623 | F | Hispanic | 47 | 40-64 | 0.0 |
| B019512 | M | Caucasian | 61 | 40-64 | 0.0 |
| B019552 | M | Caucasian | 69 | 65+ | 0.0 |
| B012169 | M | Asian | 80 | 65+ | 0.0 |
| B011413 | M | Caucasian | 22 | 22-39 | 0.0 |
| B011313 | M | African American | 24 | 22-39 | 0.0 |
| B011247 | M | Caucasian | 39 | 22-39 | 0.0 |
| B011948 | M | Hispanic | 35 | 22-39 | 0.0 |
| B011239 | M | Caucasian | 39 | 22-39 | 0.0 |
| B017035 | M | Native American | 61 | 40-64 | 0.0 |
| B011919 | M | Caucasian | 19 | 18-21 | 0.0 |
| B011965 | M | Hispanic | 27 | 22-39 | 0.0 |
| B011241 | M | Caucasian | 19 | 18-21 | 0.0 |
| B011987 | M | Caucasian | 61 | 40-64 | 0.0 |
| B011982 | M | Caucasian | 43 | 40-64 | 0.0 |
| B014163 | M | Caucasian | 59 | 40-64 | 0.0 |
| B011859 | F | Caucasian | 37 | 22-39 | 0.0 |
| B015760 | F | Caucasian | 62 | 40-64 | 0.0 |
| B011881 | M | African American | 52 | 40-64 | 0.0 |
| B011405 | M | Caucasian | 32 | 22-39 | 0.0 |
| B019504 | F | Caucasian | 61 | 40-64 | 0.0 |
| B011958 | M | Hispanic | 61 | 40-64 | 0.0 |
| B009583 | F | African American | 58 | 40-64 | 0.0 |
| B017007 | F | Native American | 26 | 22-39 | 0.0 |
| B009589 | F | African American | 47 | 40-64 | 0.0 |
| B013951 | F | Caucasian | 44 | 40-64 | 0.0 |
| B011353 | M | Caucasian | 20 | 18-21 | 0.0 |
| B017797 | M | Caucasian | 67 | 65+ | 0.0 |
| B019472 | F | Caucasian | 66 | 65+ | 0.0 |
| B011443 | M | Caucasian | 31 | 22-39 | 0.0 |
| B011169 | M | Caucasian | 36 | 22-39 | 0.0 |
| B012123 | F | Caucasian | 57 | 40-64 | 0.0 |
| B011998 | F | Caucasian | 60 | 40-64 | 0.0 |
| B011637 | M | African American | 28 | 22-39 | 0.0 |
| B012115 | M | Caucasian | 52 | 40-64 | 0.0 |
| B011451 | M | Caucasian | 28 | 22-39 | 0.0 |
| B018424 | M | Caucasian | 63 | 40-64 | 0.0 |
| B011875 | F | Caucasian | 26 | 22-39 | 0.0 |
| B011453 | M | Caucasian | 19 | 18-21 | 0.0 |
| B013915 | M | Caucasian | 74 | 65+ | 0.0 |
| B011970 | M | Hispanic | 47 | 40-64 | 0.0 |
| B011899 | M | Caucasian | 33 | 22-39 | 0.0 |
| B011179 | M | Caucasian | 31 | 22-39 | 0.0 |
| B017789 | M | Caucasian | 73 | 65+ | 0.0 |
| B011667 | M | Caucasian | 18 | 18-21 | 0.0 |
| B011187 | M | Caucasian | 22 | 22-39 | 0.0 |
| B011229 | F | Caucasian | 33 | 22-39 | 0.0 |
| B011317 | M | African American | 20 | 18-21 | 0.0 |
| B015970 | F | Caucasian | 40 | 40-64 | 0.0 |
| B012109 | M | Caucasian | 51 | 40-64 | 0.0 |
| B009575 | M | African American | 54 | 40-64 | 0.0 |
| B012260 | M | Caucasian | 47 | 40-64 | 0.0 |
| B011870 | M | Caucasian | 31 | 22-39 | 0.0 |
| B009615 | F | African American | 26 | 22-39 | 0.0 |
| B011935 | M | Caucasian | 28 | 22-39 | 0.0 |
| B012544 | M | Caucasian | 50 | 40-64 | 0.0 |
| B017031 | M | Native American | 69 | 65+ | 0.0 |
| B013937 | M | Caucasian | 43 | 40-64 | 0.0 |
| B015772 | M | Caucasian | 62 | 40-64 | 0.0 |
| B013939 | M | Caucasian | 43 | 40-64 | 0.0 |
| B011685 | F | African American | 54 | 40-64 | 0.0 |
| B018416 | M | Caucasian | 65 | 65+ | 0.0 |
| B014183 | M | Caucasian | 66 | 65+ | 0.0 |
| B013957 | M | Caucasian | 45 | 40-64 | 0.0 |
| B011036 | M | Hispanic | 33 | 22-39 | 0.0 |
| B015748 | M | Caucasian | 61 | 40-64 | 0.0 |
| B011271 | M | African American | 33 | 22-39 | 0.0 |
| B017023 | M | Native American | 77 | 65+ | 0.0 |
| B011419 | M | Caucasian | 28 | 22-39 | 0.0 |
| B016970 | M | Caucasian | 62 | 40-64 | 0.0 |
| B011645 | F | Caucasian | 32 | 22-39 | 0.0 |
| B011689 | M | African American | 29 | 22-39 | 0.0 |
| B012193 | F | Hispanic | 47 | 40-64 | 0.0 |
| B011479 | M | Caucasian | 28 | 22-39 | 0.0 |
| B013949 | M | Caucasian | 44 | 40-64 | 0.0 |
| B012611 | F | Caucasian | 61 | 40-64 | 0.0 |
| B015984 | F | Caucasian | 55 | 40-64 | 0.0 |
| B011199 | M | African American | 46 | 40-64 | 0.0 |
| B011235 | M | Caucasian | 36 | 22-39 | 0.0 |
| B014203 | F | Caucasian | 74 | 65+ | 0.0 |
| B019516 | M | Caucasian | 66 | 65+ | 0.0 |
| B011705 | M | African American | 33 | 22-39 | 0.0 |
| B011259 | M | African American | 44 | 40-64 | 0.0 |
| B009543 | M | Caucasian | 59 | 40-64 | 0.0 |
| B019548 | F | Caucasian | 62 | 40-64 | 0.0 |
| B012163 | M | Asian | 88 | 65+ | 0.0 |
| B011473 | M | Caucasian | 28 | 22-39 | 0.0 |
| B019464 | M | Caucasian | 64 | 40-64 | 0.0 |
| B011439 | F | African American | 47 | 40-64 | 0.0 |
| B018388 | F | Caucasian | 72 | 65+ | 0.0 |
| B011143 | M | Caucasian | 30 | 22-39 | 0.0 |
| B011157 | M | Caucasian | 21 | 18-21 | 0.0 |
| B011181 | M | African American | 33 | 22-39 | 0.0 |
| B014215 | F | Caucasian | 70 | 65+ | 0.0 |
| B011707 | M | African American | 39 | 22-39 | 0.0 |
| B015756 | F | Caucasian | 60 | 40-64 | 0.0 |
| B018428 | M | Caucasian | 63 | 40-64 | 0.0 |
| B019536 | M | Caucasian | 73 | 65+ | 0.0 |
| B012153 | F | Asian | 62 | 40-64 | 0.0 |
| B009581 | M | Caucasian | 55 | 40-64 | 0.0 |
| B018392 | M | Caucasian | 72 | 65+ | 0.0 |
| B015776 | F | Caucasian | 66 | 65+ | 0.0 |
| B009555 | M | Caucasian | 54 | 40-64 | 0.0 |
| B011975 | M | Hispanic | 79 | 65+ | 0.0 |
| B012213 | F | Hispanic | 61 | 40-64 | 0.0 |
| B018420 | M | Caucasian | 70 | 65+ | 0.0 |
| B011996 | M | Caucasian | 74 | 65+ | 0.0 |
| B009547 | M | African American | 38 | 22-39 | 0.0 |
| B017781 | F | Caucasian | 65 | 65+ | 0.0 |
| B011631 | M | Caucasian | 19 | 18-21 | 0.0 |
| B012264 | F | Caucasian | 48 | 40-64 | 0.0 |
| B011941 | M | Hispanic | 43 | 40-64 | 0.0 |
| B013921 | M | Caucasian | 41 | 40-64 | 0.0 |
| B011167 | M | African American | 27 | 22-39 | 0.0 |
| B011395 | M | Caucasian | 24 | 22-39 | 0.0 |
| B014227 | F | Caucasian | 62 | 40-64 | 0.0 |
| B011687 | M | African American | 54 | 40-64 | 0.0 |
| B012625 | F | Hispanic | 51 | 40-64 | 0.0 |
| B015788 | F | Caucasian | 60 | 40-64 | 0.0 |
| B011871 | M | African American | 24 | 22-39 | 0.0 |
| B011971 | M | Hispanic | 41 | 40-64 | 0.0 |
| B016950 | F | Caucasian | 68 | 65+ | 0.0 |
| B011367 | M | African American | 26 | 22-39 | 0.0 |
| B015744 | M | Caucasian | 62 | 40-64 | 0.0 |
| B014179 | M | Caucasian | 61 | 40-64 | 0.0 |
| B016938 | M | Caucasian | 71 | 65+ | 0.0 |
| B018372 | M | Caucasian | 75 | 65+ | 0.0 |
| B011780 | M | Caucasian | 31 | 22-39 | 0.0 |
| B015764 | M | Caucasian | 62 | 40-64 | 0.0 |
| B018396 | F | Caucasian | 74 | 65+ | 0.0 |
| B012247 | M | Caucasian | 42 | 40-64 | 0.0 |
| B016966 | M | Caucasian | 69 | 65+ | 0.0 |
| B017805 | M | Caucasian | 73 | 65+ | 0.0 |
| B017801 | F | Caucasian | 73 | 65+ | 0.0 |
| B017793 | M | Caucasian | 64 | 40-64 | 0.0 |
| B011361 | M | African American | 33 | 22-39 | 0.0 |
| B011295 | M | African American | 64 | 40-64 | 0.0 |
| B011407 | M | Caucasian | 26 | 22-39 | 0.0 |
| B017809 | M | Caucasian | 63 | 40-64 | 0.0 |
| B019520 | M | Caucasian | 60 | 40-64 | 0.0 |
| B011997 | M | Caucasian | 59 | 40-64 | 0.0 |
| B011862 | F | African American | 24 | 22-39 | 0.0 |
| B011151 | M | Caucasian | 33 | 22-39 | 0.0 |
| B014235 | M | Caucasian | 68 | 65+ | 0.0 |
| B011205 | M | Caucasian | 38 | 22-39 | 0.0 |
| B011972 | M | Hispanic | 42 | 40-64 | 0.0 |
| B018440 | M | Caucasian | 61 | 40-64 | 0.0 |
| B018432 | F | Caucasian | 70 | 65+ | 0.0 |
| B011635 | M | Caucasian | 39 | 22-39 | 0.0 |
| B014159 | M | Caucasian | 67 | 65+ | 0.0 |
| B011864 | M | Caucasian | 26 | 22-39 | 0.0 |
| B019508 | M | Caucasian | 65 | 65+ | 0.0 |
| B014195 | M | Caucasian | 71 | 65+ | 0.0 |
| B014211 | F | Caucasian | 60 | 40-64 | 0.0 |
| B014175 | M | Caucasian | 75 | 65+ | 0.0 |
| B019564 | M | Caucasian | 63 | 40-64 | 0.0 |
| B011321 | M | Caucasian | 36 | 22-39 | 0.0 |
| B012149 | F | Asian | 85 | 65+ | 0.0 |
| B018384 | F | Caucasian | 71 | 65+ | 0.0 |
| B018436 | F | Caucasian | 61 | 40-64 | 0.0 |
| B019556 | F | Caucasian | 65 | 65+ | 0.0 |
| B014155 | M | Caucasian | 67 | 65+ | 0.0 |
| B018408 | M | Caucasian | 77 | 65+ | 0.0 |
| B011945 | M | Hispanic | 54 | 40-64 | 0.1 |
| B014191 | M | Caucasian | 62 | 40-64 | 0.1 |
| B018380 | F | Caucasian | 72 | 65+ | 0.1 |
| B015768 | M | Caucasian | 70 | 65+ | 0.1 |
| B017785 | F | Caucasian | 72 | 65+ | 0.1 |
| B014207 | M | Caucasian | 60 | 40-64 | 0.1 |
| B014167 | M | Caucasian | 71 | 65+ | 0.2 |
| B011141 | M | Caucasian | 24 | 22-39 | 0.2 |
| B015780 | M | Caucasian | 61 | 40-64 | 0.2 |
| B019524 | M | Caucasian | 67 | 65+ | 0.2 |
| B011861 | F | African American | 40 | 40-64 | 0.2 |
| B011762 | F | Caucasian | 28 | 22-39 | 0.4 |

Table Ia. REDI-Dx Dose Estimates for Human Demographics presented in Table 2a.

| **Sample ID** | **Condition** | **Sample Cohort** | **Final Dose (Gy)** |
| --- | --- | --- | --- |
| B009512 | Type II Diabetes | Chronic Conditions | 0.0 |
| B009528 | Asthma | Chronic Conditions | 0.0 |
| B009720 | Aspirin/Ibuprofen | Chronic Conditions | 0.0 |
| B013573 | Immunocompromised | Chronic Conditions | 0.0 |
| B009943 | Lactating Woman | Chronic Conditions | 0.0 |
| B018357 | Influenza | Influenza | 0.0 |
| B013593 | Immunocompromised | Chronic Conditions | 0.0 |
| B013601 | Immunocompromised | Chronic Conditions | 0.0 |
| B009500 | High BMI | Chronic Conditions | 0.0 |
| B011787 | Allergy | Chronic Conditions | 0.0 |
| B016706 | Burn | Burn | 0.0 |
| B009459 | High BMI | Chronic Conditions | 0.0 |
| B012707 | Psoriasis | Chronic Conditions | 0.0 |
| B010015 | Heart Disease | Chronic Conditions | 0.0 |
| B009951 | Heart Disease | Chronic Conditions | 0.0 |
| B009942 | Lactating Woman | Chronic Conditions | 0.0 |
| B016979 | Burn | Burn | 0.0 |
| B012667 | Aspirin/Ibuprofen | Chronic Conditions | 0.0 |
| B009518 | Type II Diabetes | Chronic Conditions | 0.0 |
| B009698 | Allergy | Chronic Conditions | 0.0 |
| B009520 | Asthma | Chronic Conditions | 0.0 |
| B010058 | Heart Disease | Chronic Conditions | 0.0 |
| B016713 | Burn | Burn | 0.0 |
| B012659 | Inflammatory Bowel Disease | Chronic Conditions | 0.0 |
| B013621 | Immunocompromised | Chronic Conditions | 0.0 |
| B011783 | Allergy | Chronic Conditions | 0.0 |
| B009514 | Aspirin/Ibuprofen | Chronic Conditions | 0.0 |
| B013609 | Immunocompromised | Chronic Conditions | 0.0 |
| B012671 | Aspirin/Ibuprofen | Chronic Conditions | 0.0 |
| B009941 | Lactating Woman | Chronic Conditions | 0.0 |
| B013603 | Immunocompromised | Chronic Conditions | 0.0 |
| B009453 | High BMI | Chronic Conditions | 0.0 |
| B009504 | Aspirin/Ibuprofen | Chronic Conditions | 0.0 |
| B009726 | Lactating Woman | Chronic Conditions | 0.0 |
| B008722 | Pregnancy | Chronic Conditions | 0.0 |
| B014147 | Lactating Woman | Chronic Conditions | 0.0 |
| B009710 | High BMI | Chronic Conditions | 0.0 |
| B017845 | Huntington's Disease | Chronic Conditions | 0.0 |
| B009437 | Pregnancy | Chronic Conditions | 0.0 |
| B017833 | Huntington's Disease | Chronic Conditions | 0.0 |
| B012695 | Osteoarthritis | Chronic Conditions | 0.0 |
| B009524 | Type II Diabetes | Chronic Conditions | 0.0 |
| B013561 | Rheumatoid Arthritis | Chronic Conditions | 0.0 |
| B009730 | Rheumatoid Arthritis | Chronic Conditions | 0.0 |
| B009690 | Allergy | Chronic Conditions | 0.0 |
| B012663 | Aspirin/Ibuprofen | Chronic Conditions | 0.0 |
| B009706 | Asthma | Chronic Conditions | 0.0 |
| B017881 | Trauma | Trauma | 0.0 |
| B018359 | Influenza | Influenza | 0.0 |
| B009530 | Type II Diabetes | Chronic Conditions | 0.0 |
| B012827 | Inflammatory Bowel Disease | Chronic Conditions | 0.0 |
| B009949 | Aspirin/Ibuprofen | Chronic Conditions | 0.0 |
| B011815 | Heart Disease | Chronic Conditions | 0.0 |
| B009724 | Aspirin/Ibuprofen | Chronic Conditions | 0.0 |
| B009451 | High BMI | Chronic Conditions | 0.0 |
| B013595 | Immunocompromised | Chronic Conditions | 0.0 |
| B013633 | Lactating Woman | Chronic Conditions | 0.0 |
| B009714 | High BMI | Chronic Conditions | 0.0 |
| B009455 | High BMI | Chronic Conditions | 0.0 |
| B018304 | Burn | Burn | 0.0 |
| B012687 | Osteoarthritis | Chronic Conditions | 0.0 |
| B009439 | Pregnancy | Chronic Conditions | 0.0 |
| B013661 | Lactating Woman | Chronic Conditions | 0.0 |
| B013611 | Immunocompromised | Chronic Conditions | 0.0 |
| B009438 | Pregnancy | Chronic Conditions | 0.0 |
| B013637 | Lactating Woman | Chronic Conditions | 0.0 |
| B009708 | High BMI | Chronic Conditions | 0.0 |
| B010003 | High BMI | Chronic Conditions | 0.0 |
| B009488 | Pregnancy | Chronic Conditions | 0.0 |
| B013551 | Rheumatoid Arthritis | Chronic Conditions | 0.0 |
| B018482 | Burn | Burn | 0.0 |
| B012655 | COPD | Chronic Conditions | 0.0 |
| B010011 | High BMI | Chronic Conditions | 0.0 |
| B012699 | Osteoarthritis | Chronic Conditions | 0.0 |
| B014145 | Sunburn | Chronic Conditions | 0.0 |
| B017853 | Huntington's Disease | Chronic Conditions | 0.0 |
| B018366 | Influenza | Influenza | 0.0 |
| B017865 | Huntington's Disease | Chronic Conditions | 0.0 |
| B013533 | Rheumatoid Arthritis | Chronic Conditions | 0.0 |
| B009704 | Asthma | Chronic Conditions | 0.0 |
| B017825 | Huntington's Disease | Chronic Conditions | 0.0 |
| B013681 | Lactating Woman | Chronic Conditions | 0.0 |
| B009441 | Pregnancy | Chronic Conditions | 0.0 |
| B009008 | Rheumatoid Arthritis | Chronic Conditions | 0.0 |
| B011789 | Aspirin/Ibuprofen | Chronic Conditions | 0.0 |
| B009712 | High BMI | Chronic Conditions | 0.0 |
| B012839 | COPD | Chronic Conditions | 0.0 |
| B009947 | Asthma | Chronic Conditions | 0.0 |
| B012691 | Osteoarthritis | Chronic Conditions | 0.0 |
| B009948 | Asthma | Chronic Conditions | 0.0 |
| B012711 | Psoriasis | Chronic Conditions | 0.0 |
| B012859 | Pregnancy | Chronic Conditions | 0.0 |
| B011851 | Inflammatory Bowel Disease | Chronic Conditions | 0.0 |
| B016233 | Parkinson's Disease | Chronic Conditions | 0.0 |
| B009944 | Rheumatoid Arthritis | Chronic Conditions | 0.0 |
| B013517 | Type II Diabetes | Chronic Conditions | 0.0 |
| B014971 | Sunburn | Chronic Conditions | 0.0 |
| B009457 | High BMI | Chronic Conditions | 0.0 |
| B009732 | Type II Diabetes | Chronic Conditions | 0.0 |
| B018294 | Burn | Burn | 0.0 |
| B011793 | Asthma | Chronic Conditions | 0.0 |
| B016711 | Burn | Burn | 0.0 |
| B009946 | Rheumatoid Arthritis | Chronic Conditions | 0.0 |
| B011847 | Inflammatory Bowel Disease | Chronic Conditions | 0.0 |
| B018897 | Burn | Burn | 0.0 |
| B017837 | Huntington's Disease | Chronic Conditions | 0.0 |
| B009728 | Rheumatoid Arthritis | Chronic Conditions | 0.0 |
| B013566 | Rheumatoid Arthritis | Chronic Conditions | 0.0 |
| B013581 | Immunocompromised | Chronic Conditions | 0.0 |
| B013569 | Immunocompromised | Chronic Conditions | 0.0 |
| B010023 | Heart Disease | Chronic Conditions | 0.0 |
| B011817 | Immunocompromised | Chronic Conditions | 0.0 |
| B009516 | Aspirin/Ibuprofen | Chronic Conditions | 0.0 |
| B017857 | Huntington's Disease | Chronic Conditions | 0.0 |
| B009490 | Pregnancy | Chronic Conditions | 0.0 |
| B018903 | Trauma | Trauma | 0.0 |
| B013649 | Lactating Woman | Chronic Conditions | 0.0 |
| B012855 | Pregnancy | Chronic Conditions | 0.0 |
| B012276 | Allergy | Chronic Conditions | 0.0 |
| B009443 | Pregnancy | Chronic Conditions | 0.0 |
| B013545 | Rheumatoid Arthritis | Chronic Conditions | 0.0 |
| B009510 | Type II Diabetes | Chronic Conditions | 0.0 |
| B018302 | Burn | Burn | 0.0 |
| B011823 | Immunocompromised | Chronic Conditions | 0.0 |
| B011839 | Type II Diabetes | Chronic Conditions | 0.0 |
| B013669 | Lactating Woman | Chronic Conditions | 0.0 |
| B009445 | Pregnancy | Chronic Conditions | 0.0 |
| B009526 | Asthma | Chronic Conditions | 0.0 |
| B013541 | Rheumatoid Arthritis | Chronic Conditions | 0.0 |
| B018506 | Burn | Burn | 0.0 |
| B013549 | Rheumatoid Arthritis | Chronic Conditions | 0.0 |
| B017813 | Huntington's Disease | Chronic Conditions | 0.0 |
| B009499 | High BMI | Chronic Conditions | 0.0 |
| B011811 | Heart Disease | Chronic Conditions | 0.0 |
| B009461 | High BMI | Chronic Conditions | 0.0 |
| B012651 | COPD | Chronic Conditions | 0.0 |
| B009496 | High BMI | Chronic Conditions | 0.0 |
| B011803 | Osteoarthritis | Chronic Conditions | 0.0 |
| B012703 | Osteoarthritis | Chronic Conditions | 0.0 |
| B012843 | COPD | Chronic Conditions | 0.0 |
| B013542 | Rheumatoid Arthritis | Chronic Conditions | 0.0 |
| B012274 | Allergy | Chronic Conditions | 0.0 |
| B018364 | Influenza | Influenza | 0.0 |
| B009467 | Aspirin/Ibuprofen | Chronic Conditions | 0.0 |
| B019570 | Burn | Burn | 0.0 |
| B018367 | Influenza | Influenza | 0.0 |
| B014940 | Pregnancy | Chronic Conditions | 0.0 |
| B013629 | Lactating Woman | Chronic Conditions | 0.0 |
| B009940 | Aspirin/Ibuprofen | Chronic Conditions | 0.0 |
| B013677 | Lactating Woman | Chronic Conditions | 0.0 |
| B009502 | Aspirin/Ibuprofen | Chronic Conditions | 0.0 |
| B013585 | Immunocompromised | Chronic Conditions | 0.0 |
| B012683 | Immunocompromised | Chronic Conditions | 0.0 |
| B013657 | Lactating Woman | Chronic Conditions | 0.0 |
| B008716 | Pregnancy | Chronic Conditions | 0.0 |
| B009722 | Aspirin/Ibuprofen | Chronic Conditions | 0.0 |
| B017647 | Burn | Burn | 0.0 |
| B013665 | Lactating Woman | Chronic Conditions | 0.0 |
| B012871 | Pregnancy | Chronic Conditions | 0.0 |
| B016717 | Burn | Burn | 0.0 |
| B018358 | Influenza | Influenza | 0.0 |
| B018512 | Burn | Burn | 0.0 |
| B016977 | Burn | Burn | 0.0 |
| B016974 | Burn | Burn | 0.0 |
| B010017 | Heart Disease | Chronic Conditions | 0.0 |
| B012863 | Pregnancy | Chronic Conditions | 0.0 |
| B013653 | Lactating Woman | Chronic Conditions | 0.0 |
| B016975 | Burn | Burn | 0.0 |
| B010019 | Heart Disease | Chronic Conditions | 0.0 |
| B014097 | Immunocompromised | Chronic Conditions | 0.0 |
| B009532 | Type II Diabetes | Chronic Conditions | 0.0 |
| B009700 | Aspirin/Ibuprofen | Chronic Conditions | 0.0 |
| B010005 | High BMI | Chronic Conditions | 0.0 |
| B010025 | Rheumatoid Arthritis | Chronic Conditions | 0.0 |
| B011795 | COPD | Chronic Conditions | 0.0 |
| B011827 | Aspirin/Ibuprofen | Chronic Conditions | 0.0 |
| B013557 | Rheumatoid Arthritis | Chronic Conditions | 0.0 |
| B014943 | Pregnancy | Chronic Conditions | 0.0 |
| B011831 | Immunocompromised | Chronic Conditions | 0.0 |
| B017861 | Huntington's Disease | Chronic Conditions | 0.0 |
| B009508 | Aspirin/Ibuprofen | Chronic Conditions | 0.0 |
| B013606 | Immunocompromised | Chronic Conditions | 0.0 |
| B018538 | Burn | Burn | 0.0 |
| B010027 | Rheumatoid Arthritis | Chronic Conditions | 0.0 |
| B017873 | Burn | Burn | 0.0 |
| B013645 | Lactating Woman | Chronic Conditions | 0.0 |
| B013553 | Rheumatoid Arthritis | Chronic Conditions | 0.0 |
| B017649 | Burn | Burn | 0.0 |
| B013641 | Lactating Woman | Chronic Conditions | 0.0 |
| B009465 | Aspirin/Ibuprofen | Chronic Conditions | 0.0 |
| B013565 | Rheumatoid Arthritis | Chronic Conditions | 0.0 |
| B013673 | Lactating Woman | Chronic Conditions | 0.0 |
| B017869 | Huntington's Disease | Chronic Conditions | 0.0 |
| B017883 | Trauma | Trauma | 0.0 |
| B017829 | Huntington's Disease | Chronic Conditions | 0.0 |
| B018899 | Trauma | Trauma | 0.0 |
| B017655 | Trauma | Trauma | 0.0 |
| B012831 | Inflammatory Bowel Disease | Chronic Conditions | 0.0 |
| B009716 | High BMI | Chronic Conditions | 0.0 |
| B012270 | Type II Diabetes | Chronic Conditions | 0.0 |
| B009492 | Pregnancy | Chronic Conditions | 0.0 |
| B008719 | Pregnancy | Chronic Conditions | 0.0 |
| B016708 | Burn | Burn | 0.0 |
| B008713 | Pregnancy | Chronic Conditions | 0.0 |
| B018173 | Trauma | Trauma | 0.0 |
| B009522 | Aspirin/Ibuprofen | Chronic Conditions | 0.0 |
| B009469 | Type II Diabetes | Chronic Conditions | 0.0 |
| B012867 | Pregnancy | Chronic Conditions | 0.0 |
| B009945 | Rheumatoid Arthritis | Chronic Conditions | 0.0 |
| B011841 | Type II Diabetes | Chronic Conditions | 0.0 |
| B017821 | Huntington's Disease | Chronic Conditions | 0.0 |
| B009494 | Pregnancy | Chronic Conditions | 0.0 |
| B018508 | Burn | Burn | 0.0 |
| B012875 | Pregnancy | Chronic Conditions | 0.0 |
| B013537 | Rheumatoid Arthritis | Chronic Conditions | 0.0 |
| B018491 | Trauma | Trauma | 0.0 |
| B013626 | Immunocompromised | Chronic Conditions | 0.0 |
| B011819 | Immunocompromised | Chronic Conditions | 0.0 |
| B012835 | Sunburn | Chronic Conditions | 0.0 |
| B016237 | Parkinson's Disease | Chronic Conditions | 0.0 |
| B016249 | Parkinson's Disease | Chronic Conditions | 0.0 |
| B012879 | Pregnancy | Chronic Conditions | 0.0 |
| B017665 | Trauma | Trauma | 0.0 |
| B017653 | Trauma | Trauma | 0.0 |
| B017875 | Trauma | Trauma | 0.0 |
| B012847 | COPD | Chronic Conditions | 0.0 |
| B013529 | Rheumatoid Arthritis | Chronic Conditions | 0.0 |
| B008710 | Pregnancy | Chronic Conditions | 0.0 |
| B018514 | Trauma | Trauma | 0.0 |
| B009463 | High BMI | Chronic Conditions | 0.0 |
| B009506 | Asthma | Chronic Conditions | 0.0 |
| B010009 | High BMI | Chronic Conditions | 0.0 |
| B018169 | Burn | Burn | 0.0 |
| B013613 | Immunocompromised | Chronic Conditions | 0.0 |
| B018354 | Influenza | Influenza | 0.0 |
| B017651 | Trauma | Trauma | 0.0 |
| B016981 | Burn | Burn | 0.0 |
| B010029 | Type II Diabetes | Chronic Conditions | 0.0 |
| B017273 | Trauma | Trauma | 0.0 |
| B012272 | Allergy | Chronic Conditions | 0.0 |
| B011843 | Type II Diabetes | Chronic Conditions | 0.0 |
| B013598 | Immunocompromised | Chronic Conditions | 0.0 |
| B018106 | Burn | Burn | 0.0 |
| B018300 | Burn | Burn | 0.0 |
| B018171 | Trauma | Trauma | 0.0 |
| B018901 | Trauma | Trauma | 0.0 |
| B018104 | Burn | Burn | 0.0 |
| B018536 | Burn | Burn | 0.0 |
| B013513 | Type II Diabetes | Chronic Conditions | 0.0 |
| B013525 | Type II Diabetes | Chronic Conditions | 0.0 |
| B013521 | Type II Diabetes | Chronic Conditions | 0.0 |
| B013589 | Immunocompromised | Chronic Conditions | 0.0 |
| B018108 | Burn | Burn | 0.0 |
| B009447 | Asthma | Chronic Conditions | 0.0 |
| B014095 | Immunocompromised | Chronic Conditions | 0.0 |
| B016983 | Burn | Burn | 0.0 |
| B013546 | Rheumatoid Arthritis | Chronic Conditions | 0.0 |
| B017879 | Trauma | Trauma | 0.0 |
| B018510 | Burn | Burn | 0.0 |
| B009449 | High BMI | Chronic Conditions | 0.0 |
| B011807 | Osteoarthritis | Chronic Conditions | 0.0 |
| B009952 | Heart Disease | Chronic Conditions | 0.0 |
| B018356 | Influenza | Influenza | 0.0 |
| B013586 | Immunocompromised | Chronic Conditions | 0.0 |
| B018360 | Influenza | Influenza | 0.0 |
| B017645 | Burn | Burn | 0.0 |
| B013605 | Immunocompromised | Chronic Conditions | 0.0 |
| B017277 | Trauma | Trauma | 0.0 |
| B018540 | Trauma | Trauma | 0.0 |
| B018362 | Influenza | Influenza | 0.0 |
| B016987 | Trauma | Trauma | 0.0 |
| B016715 | Burn | Burn | 0.0 |
| B013597 | Immunocompromised | Chronic Conditions | 0.0 |
| B017841 | Huntington's Disease | Chronic Conditions | 0.0 |
| B018306 | Trauma | Trauma | 0.0 |
| B016719 | Trauma | Trauma | 0.0 |
| B017877 | Trauma | Trauma | 0.0 |
| B018308 | Trauma | Trauma | 0.0 |
| B016245 | Parkinson's Disease | Chronic Conditions | 0.0 |
| B017849 | Huntington's Disease | Chronic Conditions | 0.0 |
| B018110 | Trauma | Trauma | 0.0 |
| B019572 | Burn | Burn | 0.0 |
| B018489 | Trauma | Trauma | 0.0 |
| B018904 | Trauma | Trauma | 0.0 |
| B019576 | Burn | Burn | 0.0 |
| B016229 | Parkinson's Disease | Chronic Conditions | 0.0 |
| B019574 | Burn | Burn | 0.0 |
| B009950 | Heart Disease | Chronic Conditions | 0.0 |
| B013509 | Type II Diabetes | Chronic Conditions | 0.0 |
| B013625 | Immunocompromised | Chronic Conditions | 0.0 |
| B016241 | Parkinson's Disease | Chronic Conditions | 0.0 |
| B019568 | Burn | Burn | 0.0 |
| B016985 | Trauma | Trauma | 0.0 |
| B016722 | Trauma | Trauma | 0.0 |
| B018296 | Burn | Burn | 0.0 |
| B017275 | Trauma | Trauma | 0.0 |
| B018313 | Trauma | Trauma | 0.0 |
| B009718 | Heart Disease | Chronic Conditions | 0.0 |
| B018518 | Trauma | Trauma | 0.0 |
| B017661 | Trauma | Trauma | 0.0 |
| B010013 | Heart Disease | Chronic Conditions | 0.0 |
| B018485 | Burn | Burn | 0.0 |
| B018905 | Trauma | Trauma | 0.0 |
| B018361 | Influenza | Influenza | 0.0 |
| B017663 | Trauma | Trauma | 0.0 |
| B018175 | Trauma | Trauma | 0.0 |
| B018517 | Trauma | Trauma | 0.0 |
| B017271 | Burn | Burn | 0.0 |
| B016710 | Burn | Burn | 0.0 |
| B018516 | Trauma | Trauma | 0.0 |
| B016724 | Trauma | Trauma | 0.0 |
| B018298 | Burn | Burn | 0.0 |
| B017659 | Trauma | Trauma | 0.0 |
| B011799 | COPD | Chronic Conditions | 0.0 |
| B018487 | Trauma | Trauma | 0.0 |
| B018311 | Trauma | Trauma | 0.0 |
| B010007 | High BMI | Chronic Conditions | 0.1 |
| B017817 | Huntington's Disease | Chronic Conditions | 0.1 |
| B013577 | Immunocompromised | Chronic Conditions | 0.1 |
| B018483 | Burn | Burn | 0.1 |
| B016720 | Trauma | Trauma | 0.1 |
| B017269 | Burn | Burn | 0.1 |
| B018493 | Trauma | Trauma | 0.1 |
| B018542 | Trauma | Trauma | 0.2 |
| B019578 | Trauma | Trauma | 0.2 |
| B017657 | Trauma | Trauma | 0.3 |
| B016989 | Trauma | Trauma | 0.3 |
| B018365 | Influenza | Influenza | 0.4 |
| B018363 | Influenza | Influenza | 0.5 |
| B018355 | Influenza | Influenza | 0.6 |
| B018315 | Trauma | Trauma | 1.1 |

Table Ib. REDI-Dx Dose Estimates for Confounders Testing presented in Table 3

Table J. REDI-Dx Dose Estimates For irradiated NHP data used to calculate ROC analysis, shown in Figures 3-6.

| **Animal ID** | **Actual Dose** | **TPI** | **REDI-Dx Dose (Gy)** |
| --- | --- | --- | --- |
| HS0908065 | 0 | 0 | 0 |
| HS0906115 | 0 | 0 | 0 |
| R090293 | 0 | 0 | 0 |
| R100219 | 0 | 0 | 0 |
| HS1008057 | 0 | 0 | 0 |
| R101646 | 0 | 0 | 0 |
| HS0908090 | 0 | 0 | 0 |
| R100110 | 0 | 0 | 0 |
| HS0906102 | 0 | 0 | 0 |
| RO90064 | 0 | 0 | 0 |
| HS1005063 | 0 | 0 | 0 |
| HS1008119 | 0 | 0 | 0 |
| R100401 | 0 | 0 | 0 |
| HS1003011 | 0 | 0 | 0 |
| HS1008039 | 0 | 0 | 0 |
| HS0806014 | 0 | 0 | 0 |
| HS0906076 | 0 | 0 | 0 |
| R101638 | 0 | 0 | 0 |
| HS1008128 | 0 | 0 | 0 |
| HS1008052 | 0 | 0 | 0 |
| HS1004235 | 0 | 0 | 0 |
| HS0906103 | 0 | 0 | 0 |
| R100513 | 0 | 0 | 0 |
| R100409 | 0 | 0 | 0 |
| HS1004221 | 0 | 0 | 0 |
| HS1008056 | 0 | 0 | 0 |
| HS1008082 | 0 | 0 | 0 |
| HS0906148 | 0 | 0 | 0 |
| 1005008 | 0 | 0 | 0 |
| R100102 | 0 | 0 | 0 |
| HS0904063 | 0 | 0 | 0 |
| R100077 | 0 | 0 | 0 |
| HS1008069 | 0 | 0 | 0 |
| R100139 | 0 | 0 | 0 |
| R100063 | 0 | 0 | 0 |
| HS1008062 | 0 | 0 | 0 |
| HS0807004 | 0 | 0 | 0 |
| HS0907104 | 0 | 0 | 0 |
| R101726 | 0 | 0 | 0 |
| HS0906130 | 0 | 0 | 0 |
| HS1008049 | 0 | 0 | 0 |
| R100241 | 0 | 0 | 0 |
| R100121 | 0 | 0 | 0 |
| R100045 | 0 | 0 | 0 |
| HS1006083 | 0 | 0 | 0 |
| HS0908066 | 0 | 0 | 0 |
| HS0903106 | 0 | 0 | 0 |
| R100892 | 0 | 0 | 0 |
| R090008 | 0 | 0 | 0 |
| HS0903070 | 0 | 0 | 0 |
| HS0806103 | 0 | 0 | 0 |
| R101771 | 0 | 0 | 0 |
| HS1006051 | 0 | 0 | 0 |
| R100187 | 0 | 0 | 0 |
| HS1005089 | 0 | 0 | 0 |
| HS0907122 | 0 | 0 | 0 |
| R100138 | 0 | 0 | 0 |
| 1004010 | 0 | 0 | 0 |
| HS0908058 | 0 | 0 | 0 |
| R101696 | 0 | 0 | 0 |
| HS0908065 | 0 | 24 | 0 |
| HS0906115 | 0 | 24 | 0 |
| R090293 | 0 | 24 | 0 |
| R100219 | 0 | 24 | 0 |
| HS1008057 | 0 | 24 | 0 |
| R101646 | 0 | 24 | 0 |
| HS0908090 | 0 | 24 | 0 |
| R100110 | 0 | 24 | 0 |
| HS0906102 | 0 | 24 | 0 |
| RO90064 | 0 | 24 | 0 |
| HS1005063 | 2 | 24 | 2.7 |
| HS1008119 | 2 | 24 | 2 |
| HS0806014 | 2 | 24 | 1.6 |
| HS0906076 | 2 | 24 | 3.7 |
| HS1008128 | 2 | 24 | 2.8 |
| HS1008052 | 2 | 24 | 2.8 |
| HS1004235 | 4 | 24 | 3.5 |
| HS0906103 | 4 | 24 | 4.9 |
| R100409 | 4 | 24 | 6.7 |
| HS1008056 | 4 | 24 | 5.2 |
| HS1008082 | 4 | 24 | 3.5 |
| HS0904063 | 6 | 24 | 6.3 |
| R100077 | 6 | 24 | 7 |
| HS1008069 | 6 | 24 | 7.8 |
| R100139 | 6 | 24 | 6.4 |
| R100063 | 6 | 24 | 6.1 |
| HS1008062 | 6 | 24 | 6.6 |
| HS0807004 | 6 | 24 | 6.8 |
| HS0907104 | 6 | 24 | 5.7 |
| R101726 | 6 | 24 | 5.8 |
| HS0906130 | 6 | 24 | 5.7 |
| HS1008049 | 8 | 24 | 6.9 |
| R100241 | 8 | 24 | 6 |
| R100121 | 8 | 24 | 6.5 |
| R100045 | 8 | 24 | 6.6 |
| HS1006083 | 8 | 24 | 10.4 |
| HS0908066 | 8 | 24 | 7 |
| HS0903106 | 8 | 24 | 7.2 |
| R100892 | 8 | 24 | 7 |
| R090008 | 8 | 24 | 4.8 |
| HS0903070 | 8 | 24 | 7.2 |
| HS0806103 | 10 | 24 | 8.9 |
| HS1006051 | 10 | 24 | 6.5 |
| R100187 | 10 | 24 | 5 |
| HS1005089 | 10 | 24 | 7.2 |
| HS0907122 | 10 | 24 | 7.7 |
| R100138 | 10 | 24 | 6.5 |
| 1004010 | 10 | 24 | 6.7 |
| HS0908058 | 10 | 24 | 7.3 |
| R101696 | 10 | 24 | 7.2 |
| HS0908065 | 0 | 72 | 0 |
| HS0906115 | 0 | 72 | 0 |
| R090293 | 0 | 72 | 0 |
| R100219 | 0 | 72 | 0 |
| HS1008057 | 0 | 72 | 0 |
| R101646 | 0 | 72 | 0 |
| HS0908090 | 0 | 72 | 0 |
| R100110 | 0 | 72 | 0 |
| HS0906102 | 0 | 72 | 0 |
| RO90064 | 0 | 72 | 0 |
| HS1005063 | 2 | 72 | 2.8 |
| HS1008119 | 2 | 72 | 3.1 |
| R100401 | 2 | 72 | 2.4 |
| HS1008039 | 2 | 72 | 3.2 |
| HS0806014 | 2 | 72 | 2.8 |
| HS0906076 | 2 | 72 | 3 |
| R101638 | 2 | 72 | 3.2 |
| HS1008128 | 2 | 72 | 2.7 |
| HS1008052 | 2 | 72 | 3.2 |
| HS1004235 | 4 | 72 | 3.7 |
| HS0906103 | 4 | 72 | 6.8 |
| R100513 | 4 | 72 | 4.1 |
| R100409 | 4 | 72 | 7 |
| HS1004221 | 4 | 72 | 4.1 |
| HS1008056 | 4 | 72 | 5.9 |
| HS1008082 | 4 | 72 | 4 |
| HS0906148 | 4 | 72 | 4.4 |
| 1005008 | 4 | 72 | 3.6 |
| R100102 | 4 | 72 | 5.3 |
| HS0904063 | 6 | 72 | 6.3 |
| R100077 | 6 | 72 | 7.6 |
| HS1008069 | 6 | 72 | 8.3 |
| R100139 | 6 | 72 | 7.7 |
| R100063 | 6 | 72 | 6.6 |
| HS1008062 | 6 | 72 | 7.5 |
| HS0807004 | 6 | 72 | 6.1 |
| HS0907104 | 6 | 72 | 6.7 |
| R101726 | 6 | 72 | 7.1 |
| HS0906130 | 6 | 72 | 6.1 |
| HS1008049 | 8 | 72 | 7.2 |
| R100241 | 8 | 72 | 7.7 |
| R100121 | 8 | 72 | 7.3 |
| R100045 | 8 | 72 | 7.1 |
| HS1006083 | 8 | 72 | 8.2 |
| HS0908066 | 8 | 72 | 7.2 |
| HS0903106 | 8 | 72 | 7.8 |
| R100892 | 8 | 72 | 7.9 |
| R090008 | 8 | 72 | 6.7 |
| HS0903070 | 8 | 72 | 7.5 |
| HS0806103 | 10 | 72 | 8.4 |
| HS1006051 | 10 | 72 | 8.6 |
| R100187 | 10 | 72 | 6.4 |
| HS1005089 | 10 | 72 | 9.4 |
| HS0907122 | 10 | 72 | 8.8 |
| R100138 | 10 | 72 | 8.2 |
| 1004010 | 10 | 72 | 6.3 |
| HS0908058 | 10 | 72 | 10.7 |
| R101696 | 10 | 72 | 9.3 |
| HS0908065 | 0 | 120 | 0 |
| HS0906115 | 0 | 120 | 0 |
| R090293 | 0 | 120 | 0 |
| R100219 | 0 | 120 | 0 |
| HS1008057 | 0 | 120 | 0 |
| R101646 | 0 | 120 | 0 |
| HS0908090 | 0 | 120 | 0 |
| R100110 | 0 | 120 | 0 |
| HS0906102 | 0 | 120 | 0 |
| RO90064 | 0 | 120 | 0 |
| HS1005063 | 2 | 120 | 2.4 |
| HS1008119 | 2 | 120 | 2.6 |
| R100401 | 2 | 120 | 2.4 |
| HS1003011 | 2 | 120 | 1.3 |
| HS1008039 | 2 | 120 | 2.5 |
| HS0806014 | 2 | 120 | 2.4 |
| HS0906076 | 2 | 120 | 3.8 |
| R101638 | 2 | 120 | 3 |
| HS1008128 | 2 | 120 | 2.2 |
| HS1008052 | 2 | 120 | 2.8 |
| HS1004235 | 4 | 120 | 3.7 |
| HS0906103 | 4 | 120 | 5.4 |
| R100513 | 4 | 120 | 4.4 |
| R100409 | 4 | 120 | 6.9 |
| HS1004221 | 4 | 120 | 4.6 |
| HS1008056 | 4 | 120 | 5.6 |
| HS1008082 | 4 | 120 | 4 |
| HS0906148 | 4 | 120 | 4.2 |
| 1005008 | 4 | 120 | 2.9 |
| R100102 | 4 | 120 | 5.2 |
| HS0904063 | 6 | 120 | 5.8 |
| R100077 | 6 | 120 | 6.2 |
| HS1008069 | 6 | 120 | 7.5 |
| R100139 | 6 | 120 | 8 |
| R100063 | 6 | 120 | 7 |
| HS1008062 | 6 | 120 | 7.7 |
| HS0807004 | 6 | 120 | 5.9 |
| HS0907104 | 6 | 120 | 5.7 |
| R101726 | 6 | 120 | 7 |
| HS0906130 | 6 | 120 | 5.4 |
| HS1008049 | 8 | 120 | 7.7 |
| R100241 | 8 | 120 | 8.1 |
| R100121 | 8 | 120 | 7.5 |
| R100045 | 8 | 120 | 7.6 |
| HS1006083 | 8 | 120 | 7.4 |
| HS0908066 | 8 | 120 | 7.7 |
| HS0903106 | 8 | 120 | 8.2 |
| R100892 | 8 | 120 | 7.1 |
| R090008 | 8 | 120 | 6.5 |
| HS0903070 | 8 | 120 | 7.4 |
| HS0806103 | 10 | 120 | 9.4 |
| HS1006051 | 10 | 120 | 8 |
| R100187 | 10 | 120 | 6.6 |
| HS0907122 | 10 | 120 | 8.2 |
| R100138 | 10 | 120 | 8.1 |
| 1004010 | 10 | 120 | 5.7 |
| HS0908058 | 10 | 120 | 9.9 |
| R101696 | 10 | 120 | 10 |
| HS0908065 | 0 | 168 | 0 |
| HS0906115 | 0 | 168 | 0 |
| R090293 | 0 | 168 | 0 |
| R100219 | 0 | 168 | 0 |
| HS1008057 | 0 | 168 | 0 |
| R101646 | 0 | 168 | 0 |
| HS0908090 | 0 | 168 | 0 |
| R100110 | 0 | 168 | 0 |
| HS0906102 | 0 | 168 | 0 |
| RO90064 | 0 | 168 | 0 |
| HS1005063 | 2 | 168 | 1.7 |
| HS1008119 | 2 | 168 | 1.6 |
| R100401 | 2 | 168 | 1.9 |
| HS1003011 | 2 | 168 | 0.7 |
| HS1008039 | 2 | 168 | 1.3 |
| HS0806014 | 2 | 168 | 1.5 |
| HS0906076 | 2 | 168 | 2.8 |
| R101638 | 2 | 168 | 2.2 |
| HS1008128 | 2 | 168 | 1.5 |
| HS1008052 | 2 | 168 | 2.8 |
| HS0906103 | 4 | 168 | 4.2 |
| R100513 | 4 | 168 | 4 |
| R100409 | 4 | 168 | 4.3 |
| HS1008056 | 4 | 168 | 3 |
| HS1008082 | 4 | 168 | 4 |
| HS0906148 | 4 | 168 | 3.5 |
| 1005008 | 4 | 168 | 3.2 |
| R100102 | 4 | 168 | 4.6 |
| HS0904063 | 6 | 168 | 6 |
| R100077 | 6 | 168 | 4.7 |
| HS1008069 | 6 | 168 | 7.5 |
| R100139 | 6 | 168 | 7.4 |
| HS1008062 | 6 | 168 | 8.1 |
| HS0807004 | 6 | 168 | 5.5 |
| HS0907104 | 6 | 168 | 5.1 |
| R101726 | 6 | 168 | 6.3 |
| R100241 | 8 | 168 | 7.1 |
| R100121 | 8 | 168 | 6.7 |
| R100045 | 8 | 168 | 7.2 |
| HS1006083 | 8 | 168 | 6.7 |
| HS0908066 | 8 | 168 | 7.8 |
| HS0903106 | 8 | 168 | 7.1 |
| R100892 | 8 | 168 | 7.7 |
| R090008 | 8 | 168 | 7.4 |
| HS0903070 | 8 | 168 | 7.8 |
| HS0806103 | 10 | 168 | 10.7 |
| HS1006051 | 10 | 168 | 10.6 |
| HS0907122 | 10 | 168 | 8.3 |
| R100138 | 10 | 168 | 7.9 |
| HS0908058 | 10 | 168 | 9.7 |
| R101696 | 10 | 168 | 8.9 |
| RQ9461 | 0 | 0 | 0 |
| RQ8142 | 0 | 0 | 0 |
| RQ9400 | 0 | 0 | 0 |
| RQ8546 | 0 | 0 | 0 |
| RQ9394 | 0 | 0 | 0 |
| RQ8549 | 0 | 0 | 0 |
| RQ9377 | 0 | 0 | 0 |
| RQ8542 | 0 | 0 | 0 |
| RQ9455 | 0 | 0 | 0 |
| RQ8821 | 0 | 0 | 0 |
| RQ9396 | 0 | 0 | 0 |
| RQ8616 | 0 | 0 | 0 |
| RQ9450 | 0 | 0 | 0 |
| RQ8844 | 0 | 0 | 0 |
| RQ8526 | 0 | 0 | 0 |
| RQ9413 | 0 | 0 | 0 |
| RQ8945 | 0 | 0 | 0 |
| RQ8890 | 0 | 0 | 0 |
| RQ8490 | 0 | 0 | 0 |
| RQ9472 | 0 | 0 | 0 |
| RQ9381 | 0 | 0 | 0 |
| RQ8862 | 0 | 0 | 0 |
| RQ8172 | 0 | 0 | 0 |
| RQ9380 | 0 | 0 | 0 |
| RQ9487 | 0 | 0 | 0 |
| RQ8845 | 0 | 0 | 0 |
| RQ8533 | 0 | 0 | 0 |
| RQ9422 | 0 | 0 | 0 |
| RQ9423 | 0 | 0 | 0 |
| RQ8502 | 0 | 0 | 0 |
| RQ8888 | 0 | 0 | 0 |
| RQ9386 | 0 | 0 | 0 |
| RQ9392 | 0 | 0 | 0 |
| RQ8514 | 0 | 0 | 0 |
| RQ8520 | 0 | 0 | 0 |
| RQ9382 | 0 | 0 | 0 |
| RQ8554 | 0 | 0 | 0 |
| RQ9410 | 0 | 0 | 0 |
| RQ9056 | 0 | 0 | 0 |
| RQ9458 | 0 | 0 | 0 |
| RQ8539 | 0 | 0 | 0 |
| RQ9389 | 0 | 0 | 0 |
| RQ8871 | 0 | 0 | 0 |
| RQ8835 | 0 | 0 | 0 |
| RQ8464 | 0 | 0 | 0 |
| RQ9478 | 0 | 0 | 0 |
| RQ9484 | 0 | 0 | 0 |
| RQ8501 | 0 | 0 | 0 |
| RQ8497 | 0 | 0 | 0 |
| RQ9479 | 0 | 0 | 0 |
| RQ9454 | 0 | 0 | 0 |
| RQ8473 | 0 | 0 | 0 |
| RQ8503 | 0 | 0 | 0 |
| RQ9483 | 0 | 0 | 0 |
| RQ9481 | 0 | 0 | 0 |
| RQ8461 | 0 | 0 | 0 |
| RQ8475 | 0 | 0 | 0 |
| RQ9461 | 0 | 24 | 0 |
| RQ8142 | 0 | 24 | 0 |
| RQ9400 | 0 | 24 | 0 |
| RQ8546 | 0 | 24 | 0 |
| RQ9394 | 0 | 24 | 0 |
| RQ8549 | 0 | 24 | 0 |
| RQ9377 | 0 | 24 | 0 |
| RQ8542 | 0 | 24 | 0 |
| RQ9455 | 0 | 24 | 0 |
| RQ8821 | 0 | 24 | 0 |
| RQ9396 | 0 | 24 | 0 |
| RQ8616 | 0 | 24 | 0 |
| RQ9450 | 4 | 24 | 3.5 |
| RQ8844 | 4 | 24 | 4.6 |
| RQ8526 | 4 | 24 | 6.4 |
| RQ9413 | 4 | 24 | 4.5 |
| RQ8945 | 4 | 24 | 5.7 |
| RQ8890 | 4 | 24 | 3.9 |
| RQ8490 | 4 | 24 | 4.8 |
| RQ9472 | 4 | 24 | 4.6 |
| RQ9381 | 4 | 24 | 3.2 |
| RQ8862 | 4 | 24 | 6.9 |
| RQ8172 | 4 | 24 | 4.2 |
| RQ9380 | 4 | 24 | 4 |
| RQ9487 | 4 | 24 | 5.2 |
| RQ8845 | 4 | 24 | 3.9 |
| RQ8533 | 4 | 24 | 5.3 |
| RQ9422 | 4 | 24 | 3.6 |
| RQ9423 | 4 | 24 | 2.9 |
| RQ8502 | 4 | 24 | 4 |
| RQ8888 | 4 | 24 | 4.5 |
| RQ9386 | 4 | 24 | 3.5 |
| RQ9392 | 4 | 24 | 3.8 |
| RQ8520 | 4 | 24 | 5 |
| RQ9382 | 6 | 24 | 5.2 |
| RQ8554 | 6 | 24 | 5.7 |
| RQ9410 | 6 | 24 | 7.3 |
| RQ9056 | 6 | 24 | 5.9 |
| RQ9458 | 6 | 24 | 4.9 |
| RQ8539 | 6 | 24 | 5.1 |
| RQ9389 | 6 | 24 | 5.7 |
| RQ8871 | 6 | 24 | 5.3 |
| RQ8835 | 6 | 24 | 6.3 |
| RQ8464 | 6 | 24 | 6.6 |
| RQ9478 | 6 | 24 | 7.3 |
| RQ9484 | 6 | 24 | 6.5 |
| RQ8501 | 6 | 24 | 8.4 |
| RQ8497 | 6 | 24 | 6.2 |
| RQ9479 | 6 | 24 | 4.8 |
| RQ9454 | 6 | 24 | 6.4 |
| RQ8473 | 6 | 24 | 5.4 |
| RQ8503 | 6 | 24 | 7.1 |
| RQ9483 | 6 | 24 | 6.4 |
| RQ9481 | 6 | 24 | 6.4 |
| RQ8461 | 6 | 24 | 7.6 |
| RQ8475 | 6 | 24 | 5 |
| RQ9461 | 0 | 72 | 0 |
| RQ8142 | 0 | 72 | 0 |
| RQ9400 | 0 | 72 | 0 |
| RQ8546 | 0 | 72 | 0 |
| RQ9394 | 0 | 72 | 0 |
| RQ8549 | 0 | 72 | 0 |
| RQ9377 | 0 | 72 | 0 |
| RQ8542 | 0 | 72 | 0 |
| RQ9455 | 0 | 72 | 0 |
| RQ8821 | 0 | 72 | 0 |
| RQ9396 | 0 | 72 | 0 |
| RQ8616 | 0 | 72 | 0 |
| RQ9450 | 4 | 72 | 3.1 |
| RQ8844 | 4 | 72 | 5.7 |
| RQ8526 | 4 | 72 | 6.2 |
| RQ9413 | 4 | 72 | 5.1 |
| RQ8945 | 4 | 72 | 6.4 |
| RQ8890 | 4 | 72 | 4.5 |
| RQ8490 | 4 | 72 | 4 |
| RQ9472 | 4 | 72 | 4.5 |
| RQ9381 | 4 | 72 | 3.1 |
| RQ8862 | 4 | 72 | 5.7 |
| RQ8172 | 4 | 72 | 4.4 |
| RQ9380 | 4 | 72 | 5.3 |
| RQ9487 | 4 | 72 | 5.8 |
| RQ8845 | 4 | 72 | 3.8 |
| RQ8533 | 4 | 72 | 5.1 |
| RQ9422 | 4 | 72 | 4.1 |
| RQ9423 | 4 | 72 | 3.6 |
| RQ8502 | 4 | 72 | 4.4 |
| RQ8888 | 4 | 72 | 3.3 |
| RQ9386 | 4 | 72 | 4.5 |
| RQ9392 | 4 | 72 | 5.1 |
| RQ8520 | 4 | 72 | 4.6 |
| RQ9382 | 6 | 72 | 6.2 |
| RQ8554 | 6 | 72 | 5.4 |
| RQ9410 | 6 | 72 | 7.2 |
| RQ9056 | 6 | 72 | 6.1 |
| RQ9458 | 6 | 72 | 5.9 |
| RQ8539 | 6 | 72 | 6.3 |
| RQ9389 | 6 | 72 | 5.3 |
| RQ8871 | 6 | 72 | 8.1 |
| RQ8835 | 6 | 72 | 6.3 |
| RQ8464 | 6 | 72 | 7.6 |
| RQ9478 | 6 | 72 | 7.1 |
| RQ9484 | 6 | 72 | 6.4 |
| RQ8501 | 6 | 72 | 7.9 |
| RQ8497 | 6 | 72 | 7.1 |
| RQ9479 | 6 | 72 | 5.3 |
| RQ9454 | 6 | 72 | 7.5 |
| RQ8473 | 6 | 72 | 6.3 |
| RQ8503 | 6 | 72 | 7.4 |
| RQ9481 | 6 | 72 | 7.9 |
| RQ8461 | 6 | 72 | 8.4 |
| RQ8475 | 6 | 72 | 5.2 |
| RQ9461 | 0 | 120 | 0 |
| RQ8142 | 0 | 120 | 0 |
| RQ9400 | 0 | 120 | 0 |
| RQ8546 | 0 | 120 | 0 |
| RQ9394 | 0 | 120 | 0 |
| RQ8549 | 0 | 120 | 0 |
| RQ9377 | 0 | 120 | 0 |
| RQ8542 | 0 | 120 | 0 |
| RQ9455 | 0 | 120 | 0 |
| RQ8821 | 0 | 120 | 0 |
| RQ9396 | 0 | 120 | 0 |
| RQ8616 | 0 | 120 | 0 |
| RQ9450 | 4 | 120 | 4.3 |
| RQ8844 | 4 | 120 | 5.2 |
| RQ8526 | 4 | 120 | 5.5 |
| RQ9413 | 4 | 120 | 3.6 |
| RQ8945 | 4 | 120 | 5.8 |
| RQ8890 | 4 | 120 | 3.9 |
| RQ8490 | 4 | 120 | 3.5 |
| RQ9472 | 4 | 120 | 4.7 |
| RQ9381 | 4 | 120 | 1.9 |
| RQ8862 | 4 | 120 | 5.8 |
| RQ8172 | 4 | 120 | 3.6 |
| RQ9380 | 4 | 120 | 5.3 |
| RQ9487 | 4 | 120 | 5.4 |
| RQ8845 | 4 | 120 | 3.9 |
| RQ8533 | 4 | 120 | 4.2 |
| RQ9422 | 4 | 120 | 4.2 |
| RQ9423 | 4 | 120 | 3 |
| RQ8502 | 4 | 120 | 4.2 |
| RQ8888 | 4 | 120 | 4 |
| RQ9392 | 4 | 120 | 5.2 |
| RQ8514 | 4 | 120 | 4.9 |
| RQ8520 | 4 | 120 | 5.6 |
| RQ9382 | 6 | 120 | 6 |
| RQ8554 | 6 | 120 | 6.7 |
| RQ9410 | 6 | 120 | 7.1 |
| RQ9056 | 6 | 120 | 5.9 |
| RQ9458 | 6 | 120 | 7.3 |
| RQ8539 | 6 | 120 | 5.4 |
| RQ9389 | 6 | 120 | 5.1 |
| RQ8871 | 6 | 120 | 8.2 |
| RQ8835 | 6 | 120 | 6.1 |
| RQ8464 | 6 | 120 | 7 |
| RQ9478 | 6 | 120 | 6.8 |
| RQ9484 | 6 | 120 | 6.6 |
| RQ8501 | 6 | 120 | 7.1 |
| RQ8497 | 6 | 120 | 7.2 |
| RQ9479 | 6 | 120 | 4.4 |
| RQ9454 | 6 | 120 | 6.7 |
| RQ8473 | 6 | 120 | 7.2 |
| RQ9481 | 6 | 120 | 7.7 |
| RQ8461 | 6 | 120 | 8 |
| RQ8475 | 6 | 120 | 5.5 |
| RQ9461 | 0 | 168 | 0 |
| RQ8142 | 0 | 168 | 0 |
| RQ9400 | 0 | 168 | 0 |
| RQ8546 | 0 | 168 | 0 |
| RQ9394 | 0 | 168 | 0 |
| RQ8549 | 0 | 168 | 0 |
| RQ9377 | 0 | 168 | 0 |
| RQ8542 | 0 | 168 | 0 |
| RQ9455 | 0 | 168 | 0 |
| RQ8821 | 0 | 168 | 0 |
| RQ9396 | 0 | 168 | 0 |
| RQ8616 | 0 | 168 | 0 |
| RQ9450 | 4 | 168 | 3.2 |
| RQ8844 | 4 | 168 | 4.5 |
| RQ8526 | 4 | 168 | 4.8 |
| RQ9413 | 4 | 168 | 2.8 |
| RQ8945 | 4 | 168 | 4 |
| RQ8890 | 4 | 168 | 3.8 |
| RQ8862 | 4 | 168 | 4.6 |
| RQ8172 | 4 | 168 | 3.7 |
| RQ9380 | 4 | 168 | 3.3 |
| RQ9487 | 4 | 168 | 3.7 |
| RQ8845 | 4 | 168 | 4.2 |
| RQ8533 | 4 | 168 | 4.4 |
| RQ9422 | 4 | 168 | 4.4 |
| RQ9423 | 4 | 168 | 4.2 |
| RQ8502 | 4 | 168 | 4.8 |
| RQ8888 | 4 | 168 | 4.5 |
| RQ9386 | 4 | 168 | 4.8 |
| RQ9392 | 4 | 168 | 4.8 |
| RQ8514 | 4 | 168 | 4 |
| RQ8520 | 4 | 168 | 5 |
| RQ9382 | 6 | 168 | 4.3 |
| RQ8554 | 6 | 168 | 6.4 |
| RQ9410 | 6 | 168 | 5.9 |
| RQ9056 | 6 | 168 | 6.1 |
| RQ9458 | 6 | 168 | 5.9 |
| RQ8539 | 6 | 168 | 4.2 |
| RQ8835 | 6 | 168 | 6.7 |
| RQ8464 | 6 | 168 | 8.4 |
| RQ9478 | 6 | 168 | 5.1 |
| RQ9484 | 6 | 168 | 6.3 |
| RQ8501 | 6 | 168 | 8.4 |
| RQ8497 | 6 | 168 | 6.2 |
| RQ9479 | 6 | 168 | 4 |
| RQ9454 | 6 | 168 | 6.9 |
| RQ8473 | 6 | 168 | 7.2 |
| RQ9483 | 6 | 168 | 6.3 |
| RQ9481 | 6 | 168 | 6.8 |
| RQ8461 | 6 | 168 | 7.8 |
| RQ8475 | 6 | 168 | 4.8 |
| T106131 | 0 | 0 | 0 |
| 1006023 | 0 | 0 | 0 |
| R091631 | 0 | 0 | 0 |
| R110362 | 0 | 0 | 0 |
| R090024 | 0 | 0 | 0 |
| R100028 | 0 | 0 | 0 |
| T106133 | 0 | 0 | 0 |
| 1002023 | 0 | 0 | 0 |
| 1004057 | 0 | 0 | 0 |
| R100694 | 0 | 0 | 0 |
| T106094 | 0 | 0 | 0 |
| 11-1720R | 0 | 0 | 0 |
| HS1004019 | 0 | 0 | 0 |
| R101009 | 0 | 0 | 0 |
| 1003039 | 0 | 0 | 0 |
| R110796 | 0 | 0 | 0 |
| T116264R | 0 | 0 | 0 |
| 11-1654R | 0 | 0 | 0 |
| R100197 | 0 | 0 | 0 |
| 1102083 | 0 | 0 | 0 |
| 905113 | 0 | 0 | 0 |
| T106164 | 0 | 0 | 0 |
| R090360 | 0 | 0 | 0 |
| R100020 | 0 | 0 | 0 |
| T106131 | 1 | 72 | 1.3 |
| 1006023 | 1 | 72 | 2.6 |
| R091631 | 1 | 72 | 1.7 |
| R110362 | 1 | 72 | 1.4 |
| R090024 | 1 | 72 | 1.7 |
| R100028 | 1 | 72 | 2.1 |
| T106133 | 4 | 72 | 6 |
| 1002023 | 4 | 72 | 4.5 |
| 1004057 | 4 | 72 | 5.2 |
| R100694 | 4 | 72 | 5.9 |
| T106094 | 4 | 72 | 6.7 |
| 11-1720R | 4 | 72 | 4.2 |
| HS1004019 | 1 | 72 | 1.7 |
| 1003039 | 1 | 72 | 1.8 |
| R110796 | 1 | 72 | 1.2 |
| 11-1654R | 1 | 72 | 1.5 |
| 1102083 | 4 | 72 | 5.3 |
| 905113 | 4 | 72 | 5.3 |
| R090360 | 4 | 72 | 4 |
| R100020 | 4 | 72 | 5.7 |
| 1001 | 0 | 0 | 0 |
| 1001 | 0 | 24 | 0 |
| 1001 | 0 | 72 | 0 |
| 1001 | 0 | 168 | 0 |
| 1002 | 0 | 0 | 0 |
| 1002 | 0 | 24 | 0 |
| 1002 | 0 | 72 | 0 |
| 1002 | 0 | 168 | 0 |
| 1003 | 0 | 0 | 0 |
| 1003 | 0 | 24 | 0 |
| 1003 | 0 | 72 | 0 |
| 1003 | 0 | 168 | 0 |
| 2001 | 0 | 0 | 0 |
| 2001 | 1.5 | 24 | 1.2 |
| 2001 | 1.5 | 72 | 1 |
| 2001 | 1.5 | 168 | 0.9 |
| 2002 | 0 | 0 | 0 |
| 2002 | 1.5 | 24 | 2.4 |
| 2002 | 1.5 | 72 | 1.6 |
| 2002 | 1.5 | 168 | 1.2 |
| 2003 | 0 | 0 | 0 |
| 2003 | 1.5 | 24 | 1.6 |
| 2003 | 1.5 | 72 | 2.5 |
| 2003 | 1.5 | 168 | 1.5 |
| 3001 | 0 | 0 | 0 |
| 3001 | 2 | 24 | 1.5 |
| 3001 | 2 | 72 | 1.4 |
| 3001 | 2 | 168 | 1.3 |
| 3002 | 0 | 0 | 0 |
| 3002 | 2 | 24 | 1.5 |
| 3002 | 2 | 72 | 1.7 |
| 3002 | 2 | 168 | 1.5 |
| 3003 | 0 | 0 | 0 |
| 3003 | 2 | 24 | 2.1 |
| 3003 | 2 | 72 | 1.9 |
| 3003 | 2 | 168 | 0.6 |
| 4001 | 0 | 0 | 0 |
| 4001 | 3 | 24 | 3.8 |
| 4001 | 3 | 72 | 4.4 |
| 4001 | 3 | 168 | 2.4 |
| 4002 | 0 | 0 | 0 |
| 4002 | 3 | 24 | 3 |
| 4002 | 3 | 72 | 2.6 |
| 4002 | 3 | 168 | 1.5 |
| 4003 | 0 | 0 | 0 |
| 4003 | 3 | 24 | 2.5 |
| 4003 | 3 | 72 | 3.1 |
| 4003 | 3 | 168 | 1.6 |
| 5001 | 0 | 0 | 0 |
| 5001 | 4.5 | 24 | 5.3 |
| 5001 | 4.5 | 72 | 5.9 |
| 5001 | 4.5 | 168 | 3.8 |
| 5002 | 0 | 0 | 0 |
| 5002 | 4.5 | 24 | 5.9 |
| 5002 | 4.5 | 72 | 6.1 |
| 5002 | 4.5 | 168 | 3.1 |
| 5003 | 0 | 0 | 0 |
| 5003 | 4.5 | 24 | 4.8 |
| 5003 | 4.5 | 72 | 6.2 |
| 5003 | 4.5 | 168 | 5.8 |
| 6001 | 0 | 0 | 0 |
| 6001 | 7 | 24 | 6.3 |
| 6001 | 7 | 72 | 6.8 |
| 6002 | 0 | 0 | 0 |
| 6002 | 7 | 24 | 5.8 |
| 6002 | 7 | 72 | 6 |
| 6002 | 7 | 168 | 3.9 |
| 6003 | 0 | 0 | 0 |
| 6003 | 7 | 24 | 6.4 |
| 6003 | 7 | 72 | 6 |
| 6003 | 7 | 168 | 5.4 |
| 7001 | 0 | 0 | 0 |
| 7001 | 8 | 24 | 8.2 |
| 7001 | 8 | 72 | 8.5 |
| 7001 | 8 | 168 | 7.8 |
| 7002 | 0 | 0 | 0 |
| 7002 | 8 | 24 | 6.5 |
| 7002 | 8 | 72 | 5.7 |
| 7002 | 8 | 168 | 6.5 |
| 7003 | 0 | 0 | 0 |
| 7003 | 8 | 24 | 8 |
| 7003 | 8 | 72 | 9 |
| 132162 | 0 | 0 | 0 |
| 161533 | 0 | 0 | 0 |
| 142528 | 0 | 0 | 0 |
| 142520 | 0 | 0 | 0 |
| 161531 | 0 | 0 | 0 |
| 161552 | 0 | 0 | 0 |
| 132172 | 0 | 0 | 0 |
| 142713 | 0 | 0 | 0 |
| 161548 | 0 | 0 | 0 |
| 142556 | 0 | 0 | 0 |
| 132229 | 0 | 0 | 0 |
| 161543 | 0 | 0 | 0 |
| 142806 | 0 | 0 | 0 |
| 142724 | 0 | 0 | 0 |
| 142490 | 0 | 0 | 0 |
| 150045 | 0 | 0 | 0 |
| 161574 | 0 | 0 | 0 |
| 161469 | 0 | 0 | 0 |
| 150184 | 0 | 0 | 0 |
| 150015 | 0 | 0 | 0 |
| 161545 | 0 | 0 | 0 |
| 161501 | 0 | 0 | 0 |
| 150105 | 0 | 0 | 0 |
| 150046 | 0 | 0 | 0 |
| 150012 | 0 | 0 | 0 |
| 150094 | 0 | 0 | 0 |
| 142509 | 0 | 0 | 0 |
| 150115 | 0 | 0 | 0 |
| 132162 | 6 | 24 | 6.1 |
| 161533 | 4 | 24 | 9.6 |
| 142528 | 6 | 24 | 9.1 |
| 142520 | 4 | 24 | 4.1 |
| 161531 | 2 | 24 | 1.8 |
| 161552 | 0.5 | 24 | 0.8 |
| 132172 | 2 | 24 | 3.2 |
| 142713 | 0.5 | 24 | 0.9 |
| 161548 | 8 | 24 | 7.9 |
| 142556 | 6 | 24 | 6.8 |
| 161543 | 4 | 24 | 5.5 |
| 142806 | 2 | 24 | 1.7 |
| 142724 | 4 | 24 | 4.5 |
| 142490 | 2 | 24 | 1.8 |
| 150045 | 10 | 24 | 8.1 |
| 161574 | 3 | 24 | 3.3 |
| 161469 | 10 | 24 | 5.9 |
| 150184 | 3 | 24 | 3.1 |
| 150015 | 1 | 24 | 1 |
| 161545 | 0 | 24 | 0 |
| 161501 | 1 | 24 | 0.9 |
| 150105 | 0 | 24 | 0 |
| 150115 | 6 | 24 | 6.6 |
| 132162 | 6 | 72 | 6.7 |
| 161533 | 4 | 72 | 5.4 |
| 142528 | 6 | 72 | 6.9 |
| 142520 | 4 | 72 | 3.9 |
| 161531 | 2 | 72 | 1.9 |
| 161552 | 0.5 | 72 | 0 |
| 132172 | 2 | 72 | 3.6 |
| 142713 | 0.5 | 72 | 0.1 |
| 161548 | 8 | 72 | 8.9 |
| 142556 | 6 | 72 | 7.6 |
| 132229 | 8 | 72 | 11 |
| 161543 | 4 | 72 | 6.1 |
| 150045 | 10 | 72 | 9.6 |
| 161574 | 3 | 72 | 1.9 |
| 161469 | 10 | 72 | 7.4 |
| 150184 | 3 | 72 | 3.8 |
| 150015 | 1 | 72 | 0.7 |
| 161545 | 0 | 72 | 0 |
| 161501 | 1 | 72 | 0.7 |
| 150105 | 0 | 72 | 0 |
| 132162 | 6 | 120 | 7.5 |
| 161533 | 4 | 120 | 4.6 |
| 142528 | 6 | 120 | 5.7 |
| 142520 | 4 | 120 | 3.6 |
| 161531 | 2 | 120 | 2.1 |
| 161552 | 0.5 | 120 | 0 |
| 132172 | 2 | 120 | 2.7 |
| 142713 | 0.5 | 120 | 0 |
| 161548 | 8 | 120 | 8.6 |
| 142556 | 6 | 120 | 7.5 |
| 132229 | 8 | 120 | 10.7 |
| 161543 | 4 | 120 | 6.6 |
| 142806 | 2 | 120 | 2.7 |
| 142724 | 4 | 120 | 5.1 |
| 142490 | 2 | 120 | 1.9 |
| 150045 | 10 | 120 | 8.7 |
| 161574 | 3 | 120 | 1.2 |
| 161469 | 10 | 120 | 8.6 |
| 150184 | 3 | 120 | 1.8 |
| 150015 | 1 | 120 | 0.6 |
| 161545 | 0 | 120 | 0 |
| 161501 | 1 | 120 | 0.5 |
| 150105 | 0 | 120 | 0 |
| 150115 | 6 | 120 | 9.4 |
| 161543 | 4 | 168 | 5.6 |
| 142806 | 2 | 168 | 1.5 |
| 142724 | 4 | 168 | 2.8 |
| 142490 | 2 | 168 | 2.1 |

| **SAMPLE ID** | **STUDY ID** | **Site** | **Run (Operator)** | **Day** | **Reagent Lot** | **Replicate** | **REDI-Dx Dose (Gy)** |
| --- | --- | --- | --- | --- | --- | --- | --- |
| S0 | RP28 | DxT | 1 | 1 | 1 | 2 | 0 |
| S0 | RP28 | DxT | 1 | 1 | 1 | 3 | 0 |
| S0 | RP28 | DxT | 1 | 1 | 1 | 1 | 0 |
| S0 | RP28 | DxT | 2 | 1 | 1 | 2 | 0 |
| S0 | RP28 | DxT | 2 | 1 | 1 | 3 | 0 |
| S0 | RP28 | DxT | 2 | 1 | 1 | 1 | 0 |
| S0 | RP28 | Kashi | 1 | 1 | 1 | 2 | 0 |
| S0 | RP28 | Kashi | 1 | 1 | 1 | 3 | 0 |
| S0 | RP28 | Kashi | 1 | 1 | 1 | 1 | 0 |
| S0 | RP28 | Kashi | 1 | 2 | 1 | 2 | 0 |
| S0 | RP28 | Kashi | 1 | 2 | 1 | 3 | 0 |
| S0 | RP28 | Kashi | 1 | 2 | 1 | 1 | 0 |
| S0 | RP28 | Kashi | 2 | 1 | 1 | 2 | 0 |
| S0 | RP28 | Kashi | 2 | 1 | 1 | 3 | 0 |
| S0 | RP28 | Kashi | 2 | 1 | 1 | 1 | 0 |
| S0 | RP28 | Kashi | 2 | 2 | 1 | 2 | 0 |
| S0 | RP28 | Kashi | 2 | 2 | 1 | 3 | 0 |
| S0 | RP28 | Kashi | 2 | 2 | 1 | 1 | 0.1 |
| S0 | RP28 | DxT | 2 | 2 | 1 | 2 | 0 |
| S0 | RP28 | DxT | 2 | 2 | 1 | 3 | 0 |
| S0 | RP28 | DxT | 2 | 2 | 1 | 1 | 0 |
| S0 | RP28 | DxT | 1 | 2 | 1 | 2 | 0 |
| S0 | RP28 | DxT | 1 | 2 | 1 | 3 | 0 |
| S0 | RP28 | DxT | 1 | 2 | 1 | 1 | 0 |
| S0 | RP28 | DxT | 2 | 1 | 2 | 2 | 0 |
| S0 | RP28 | DxT | 2 | 1 | 2 | 3 | 0 |
| S0 | RP28 | DxT | 2 | 1 | 2 | 1 | 0 |
| S0 | RP28 | DxT | 1 | 3 | 1 | 2 | 0 |
| S0 | RP28 | DxT | 1 | 3 | 1 | 3 | 0 |
| S0 | RP28 | DxT | 1 | 3 | 1 | 1 | 0 |
| S0 | RP28 | DxT | 1 | 3 | 2 | 2 | 0 |
| S0 | RP28 | DxT | 1 | 3 | 2 | 3 | 0 |
| S0 | RP28 | DxT | 1 | 3 | 2 | 1 | 0 |
| S0 | RP28 | DxT | 2 | 3 | 1 | 2 | 0 |
| S0 | RP28 | DxT | 2 | 3 | 1 | 3 | 0 |
| S0 | RP28 | DxT | 2 | 3 | 1 | 1 | 0 |
| S0 | RP28 | DxT | 2 | 3 | 2 | 2 | 0 |
| S0 | RP28 | DxT | 2 | 3 | 2 | 3 | 0 |
| S0 | RP28 | DxT | 2 | 3 | 2 | 1 | 0 |
| S0 | RP28 | Kashi | 1 | 3 | 1 | 2 | 0 |
| S0 | RP28 | Kashi | 1 | 3 | 1 | 3 | 0 |
| S0 | RP28 | Kashi | 1 | 3 | 1 | 1 | 0 |
| S0 | RP28 | Kashi | 1 | 4 | 1 | 2 | 0 |
| S0 | RP28 | Kashi | 1 | 4 | 1 | 3 | 0 |
| S0 | RP28 | Kashi | 1 | 4 | 1 | 1 | 0 |
| S0 | RP28 | Kashi | 1 | 5 | 1 | 2 | 0 |
| S0 | RP28 | Kashi | 1 | 5 | 1 | 3 | 0 |
| S0 | RP28 | Kashi | 1 | 5 | 1 | 1 | 0 |
| S0 | RP28 | Kashi | 2 | 3 | 1 | 2 | 0 |
| S0 | RP28 | Kashi | 2 | 3 | 1 | 1 | 0 |
| S0 | RP28 | Kashi | 2 | 4 | 1 | 2 | 0 |
| S0 | RP28 | Kashi | 2 | 4 | 1 | 3 | 0 |
| S0 | RP28 | Kashi | 2 | 4 | 1 | 1 | 0 |
| S0 | RP28 | Kashi | 2 | 5 | 1 | 2 | 0 |
| S0 | RP28 | Kashi | 2 | 5 | 1 | 3 | 0 |
| S0 | RP28 | Kashi | 2 | 5 | 1 | 1 | 0 |
| S0 | RP28 | DxT | 2 | 4 | 1 | 2 | 0 |
| S0 | RP28 | DxT | 2 | 4 | 1 | 3 | 0 |
| S0 | RP28 | DxT | 2 | 4 | 1 | 1 | 0 |
| S0 | RP28 | DxT | 2 | 4 | 2 | 2 | 0 |
| S0 | RP28 | DxT | 2 | 4 | 2 | 3 | 0 |
| S0 | RP28 | DxT | 2 | 4 | 2 | 1 | 0 |
| S0 | RP28 | DxT | 1 | 4 | 2 | 2 | 0 |
| S0 | RP28 | DxT | 1 | 4 | 2 | 3 | 0 |
| S0 | RP28 | DxT | 1 | 4 | 2 | 1 | 0 |
| S0 | RP28 | DxT | 1 | 5 | 1 | 2 | 0 |
| S0 | RP28 | DxT | 1 | 5 | 1 | 3 | 0 |
| S0 | RP28 | DxT | 1 | 5 | 1 | 1 | 0 |
| S0 | RP28 | DxT | 1 | 5 | 2 | 2 | 0 |
| S0 | RP28 | DxT | 1 | 5 | 2 | 3 | 0 |
| S0 | RP28 | DxT | 1 | 5 | 2 | 1 | 0 |
| S0 | RP28 | DxT | 2 | 5 | 1 | 2 | 0 |
| S0 | RP28 | DxT | 2 | 5 | 1 | 3 | 0 |
| S0 | RP28 | DxT | 2 | 5 | 1 | 1 | 0 |
| S0 | RP28 | DxT | 2 | 2 | 2 | 2 | 0 |
| S0 | RP28 | DxT | 2 | 2 | 2 | 3 | 0 |
| S0 | RP28 | DxT | 2 | 2 | 2 | 1 | 0 |
| S0 | RP28 | DxT | 1 | 2 | 2 | 2 | 0 |
| S0 | RP28 | DxT | 1 | 2 | 2 | 3 | 0 |
| S0 | RP28 | DxT | 1 | 2 | 2 | 1 | 0 |
| S0 | RP28 | DxT | 2 | 5 | 2 | 2 | 0 |
| S0 | RP28 | DxT | 2 | 5 | 2 | 3 | 0 |
| S0 | RP28 | DxT | 2 | 5 | 2 | 1 | 0 |
| S0 | RP28 | DxT | 1 | 4 | 1 | 2 | 0 |
| S0 | RP28 | DxT | 1 | 4 | 1 | 3 | 0 |
| S0 | RP28 | DxT | 1 | 4 | 1 | 1 | 0 |
| S0 | RP28 | DxT | 1 | 1 | 2 | 2 | 0 |
| S0 | RP28 | DxT | 1 | 1 | 2 | 3 | 0 |
| S0 | RP28 | DxT | 1 | 1 | 2 | 1 | 0 |
| S0 | RP28 | Kashi | 2 | 3 | 1 | 3 | 0 |
| S0 | RP28 | MedF | 2 | 3 | 1 | 2 | 0 |
| S0 | RP28 | MedF | 2 | 3 | 1 | 3 | 0 |
| S0 | RP28 | MedF | 2 | 3 | 1 | 1 | 0 |
| S0 | RP28 | MedF | 1 | 3 | 1 | 2 | 0 |
| S0 | RP28 | MedF | 1 | 3 | 1 | 3 | 0 |
| S0 | RP28 | MedF | 1 | 3 | 1 | 1 | 0 |
| S0 | RP28 | MedF | 2 | 2 | 1 | 2 | 0 |
| S0 | RP28 | MedF | 2 | 2 | 1 | 3 | 0 |
| S0 | RP28 | MedF | 2 | 2 | 1 | 1 | 0 |
| S0 | RP28 | MedF | 1 | 2 | 1 | 2 | 0 |
| S0 | RP28 | MedF | 1 | 2 | 1 | 3 | 0 |
| S0 | RP28 | MedF | 1 | 2 | 1 | 1 | 0 |
| S0 | RP28 | MedF | 1 | 4 | 1 | 2 | 0 |
| S0 | RP28 | MedF | 1 | 4 | 1 | 3 | 0 |
| S0 | RP28 | MedF | 1 | 4 | 1 | 1 | 0 |
| S0 | RP28 | MedF | 2 | 4 | 1 | 2 | 0 |
| S0 | RP28 | MedF | 2 | 4 | 1 | 3 | 0 |
| S0 | RP28 | MedF | 2 | 4 | 1 | 1 | 0 |
| S0 | RP28 | MedF | 1 | 5 | 1 | 2 | 0 |
| S0 | RP28 | MedF | 1 | 5 | 1 | 3 | 0 |
| S0 | RP28 | MedF | 1 | 5 | 1 | 1 | 0 |
| S0 | RP28 | MedF | 2 | 5 | 1 | 2 | 0 |
| S0 | RP28 | MedF | 2 | 5 | 1 | 3 | 0 |
| S0 | RP28 | MedF | 2 | 5 | 1 | 1 | 0 |
| S0 | RP28 | MedF | 1 | 1 | 1 | 2 | 0 |
| S0 | RP28 | MedF | 1 | 1 | 1 | 3 | 0 |
| S0 | RP28 | MedF | 1 | 1 | 1 | 1 | 0 |
| S0 | RP28 | MedF | 2 | 1 | 1 | 2 | 0 |
| S0 | RP28 | MedF | 2 | 1 | 1 | 3 | 0 |
| S0 | RP28 | MedF | 2 | 1 | 1 | 1 | 0 |
| S1 | RP3 | DxT | 2 | 1 | 1 | 2 | 0.9 |
| S1 | RP3 | DxT | 2 | 1 | 1 | 1 | 0.9 |
| S1 | RP3 | DxT | 2 | 1 | 1 | 3 | 0.9 |
| S1 | RP3 | Kashi | 1 | 1 | 1 | 2 | 1 |
| S1 | RP3 | Kashi | 1 | 1 | 1 | 3 | 1.1 |
| S1 | RP3 | Kashi | 1 | 1 | 1 | 1 | 0.9 |
| S1 | RP3 | Kashi | 1 | 2 | 1 | 2 | 1.2 |
| S1 | RP3 | Kashi | 1 | 2 | 1 | 3 | 1.1 |
| S1 | RP3 | Kashi | 1 | 2 | 1 | 1 | 1 |
| S1 | RP3 | Kashi | 2 | 1 | 1 | 2 | 1.6 |
| S1 | RP3 | Kashi | 2 | 1 | 1 | 3 | 1.3 |
| S1 | RP3 | Kashi | 2 | 1 | 1 | 1 | 1.5 |
| S1 | RP3 | Kashi | 2 | 2 | 1 | 2 | 1.3 |
| S1 | RP3 | Kashi | 2 | 2 | 1 | 3 | 1.3 |
| S1 | RP3 | Kashi | 2 | 2 | 1 | 1 | 1 |
| S1 | RP3 | DxT | 2 | 2 | 1 | 2 | 0.9 |
| S1 | RP3 | DxT | 2 | 2 | 1 | 1 | 1 |
| S1 | RP3 | DxT | 2 | 2 | 1 | 3 | 1 |
| S1 | RP3 | DxT | 1 | 2 | 1 | 2 | 0.8 |
| S1 | RP3 | DxT | 1 | 2 | 1 | 1 | 1 |
| S1 | RP3 | DxT | 1 | 2 | 1 | 3 | 0.8 |
| S1 | RP3 | DxT | 2 | 1 | 2 | 2 | 1 |
| S1 | RP3 | DxT | 2 | 1 | 2 | 1 | 1.1 |
| S1 | RP3 | DxT | 2 | 1 | 2 | 3 | 1 |
| S1 | RP3 | DxT | 1 | 3 | 1 | 2 | 0.9 |
| S1 | RP3 | DxT | 1 | 3 | 1 | 1 | 1.1 |
| S1 | RP3 | DxT | 1 | 3 | 1 | 3 | 0.9 |
| S1 | RP3 | DxT | 1 | 3 | 2 | 2 | 1 |
| S1 | RP3 | DxT | 1 | 3 | 2 | 1 | 0.9 |
| S1 | RP3 | DxT | 1 | 3 | 2 | 3 | 1 |
| S1 | RP3 | DxT | 2 | 3 | 1 | 2 | 0.8 |
| S1 | RP3 | DxT | 2 | 3 | 1 | 1 | 0.9 |
| S1 | RP3 | DxT | 2 | 3 | 1 | 3 | 0.8 |
| S1 | RP3 | DxT | 2 | 3 | 2 | 2 | 1.3 |
| S1 | RP3 | DxT | 2 | 3 | 2 | 1 | 1 |
| S1 | RP3 | DxT | 2 | 3 | 2 | 3 | 1.1 |
| S1 | RP3 | Kashi | 1 | 3 | 1 | 2 | 1 |
| S1 | RP3 | Kashi | 1 | 3 | 1 | 3 | 1 |
| S1 | RP3 | Kashi | 1 | 3 | 1 | 1 | 0.9 |
| S1 | RP3 | Kashi | 1 | 4 | 1 | 2 | 1.1 |
| S1 | RP3 | Kashi | 1 | 4 | 1 | 3 | 1.1 |
| S1 | RP3 | Kashi | 1 | 4 | 1 | 1 | 1 |
| S1 | RP3 | Kashi | 1 | 5 | 1 | 2 | 1.1 |
| S1 | RP3 | Kashi | 1 | 5 | 1 | 3 | 1.2 |
| S1 | RP3 | Kashi | 1 | 5 | 1 | 1 | 0.9 |
| S1 | RP3 | Kashi | 2 | 3 | 1 | 2 | 1 |
| S1 | RP3 | Kashi | 2 | 3 | 1 | 3 | 0.9 |
| S1 | RP3 | Kashi | 2 | 3 | 1 | 1 | 0.9 |
| S1 | RP3 | Kashi | 2 | 4 | 1 | 2 | 0.9 |
| S1 | RP3 | Kashi | 2 | 4 | 1 | 3 | 0.9 |
| S1 | RP3 | Kashi | 2 | 4 | 1 | 1 | 0.9 |
| S1 | RP3 | Kashi | 2 | 5 | 1 | 2 | 1.2 |
| S1 | RP3 | Kashi | 2 | 5 | 1 | 3 | 1.1 |
| S1 | RP3 | Kashi | 2 | 5 | 1 | 1 | 1 |
| S1 | RP3 | DxT | 2 | 4 | 1 | 1 | 0.9 |
| S1 | RP3 | DxT | 2 | 4 | 1 | 3 | 0.8 |
| S1 | RP3 | DxT | 2 | 4 | 2 | 2 | 0.9 |
| S1 | RP3 | DxT | 2 | 4 | 2 | 1 | 1.2 |
| S1 | RP3 | DxT | 2 | 4 | 2 | 3 | 0.9 |
| S1 | RP3 | DxT | 1 | 4 | 2 | 2 | 0.9 |
| S1 | RP3 | DxT | 1 | 4 | 2 | 1 | 1.1 |
| S1 | RP3 | DxT | 1 | 4 | 2 | 3 | 1 |
| S1 | RP3 | DxT | 1 | 5 | 1 | 2 | 0.8 |
| S1 | RP3 | DxT | 1 | 5 | 1 | 1 | 0.8 |
| S1 | RP3 | DxT | 1 | 5 | 1 | 3 | 0.8 |
| S1 | RP3 | DxT | 1 | 5 | 2 | 2 | 1 |
| S1 | RP3 | DxT | 1 | 5 | 2 | 1 | 1 |
| S1 | RP3 | DxT | 1 | 5 | 2 | 3 | 1 |
| S1 | RP3 | DxT | 2 | 5 | 1 | 2 | 0.8 |
| S1 | RP3 | DxT | 2 | 5 | 1 | 1 | 0.9 |
| S1 | RP3 | DxT | 2 | 5 | 1 | 3 | 0.8 |
| S1 | RP3 | DxT | 2 | 2 | 2 | 2 | 1 |
| S1 | RP3 | DxT | 2 | 2 | 2 | 1 | 1 |
| S1 | RP3 | DxT | 2 | 2 | 2 | 3 | 1.2 |
| S1 | RP3 | DxT | 1 | 2 | 2 | 2 | 0.9 |
| S1 | RP3 | DxT | 1 | 2 | 2 | 1 | 1 |
| S1 | RP3 | DxT | 1 | 2 | 2 | 3 | 1 |
| S1 | RP3 | DxT | 2 | 5 | 2 | 2 | 0.9 |
| S1 | RP3 | DxT | 2 | 5 | 2 | 1 | 1 |
| S1 | RP3 | DxT | 2 | 5 | 2 | 3 | 1 |
| S1 | RP3 | DxT | 1 | 4 | 1 | 2 | 0.8 |
| S1 | RP3 | DxT | 1 | 4 | 1 | 1 | 0.8 |
| S1 | RP3 | DxT | 1 | 4 | 1 | 3 | 0.8 |
| S1 | RP3 | DxT | 1 | 1 | 2 | 2 | 1 |
| S1 | RP3 | DxT | 1 | 1 | 2 | 1 | 0.9 |
| S1 | RP3 | DxT | 1 | 1 | 2 | 3 | 1 |
| S1 | RP3 | DxT | 1 | 1 | 1 | 2 | 1 |
| S1 | RP3 | DxT | 1 | 1 | 1 | 1 | 1.1 |
| S1 | RP3 | DxT | 1 | 1 | 1 | 3 | 1 |
| S1 | RP3 | DxT | 2 | 4 | 1 | 2 | 0.9 |
| S1 | RP3 | MedF | 2 | 3 | 1 | 2 | 1 |
| S1 | RP3 | MedF | 2 | 3 | 1 | 1 | 1 |
| S1 | RP3 | MedF | 2 | 3 | 1 | 3 | 1 |
| S1 | RP3 | MedF | 1 | 3 | 1 | 2 | 1 |
| S1 | RP3 | MedF | 1 | 3 | 1 | 1 | 1.1 |
| S1 | RP3 | MedF | 1 | 3 | 1 | 3 | 1 |
| S1 | RP3 | MedF | 2 | 2 | 1 | 2 | 1.1 |
| S1 | RP3 | MedF | 2 | 2 | 1 | 1 | 1.4 |
| S1 | RP3 | MedF | 2 | 2 | 1 | 3 | 1 |
| S1 | RP3 | MedF | 1 | 2 | 1 | 2 | 1 |
| S1 | RP3 | MedF | 1 | 2 | 1 | 1 | 0.8 |
| S1 | RP3 | MedF | 1 | 2 | 1 | 3 | 1 |
| S1 | RP3 | MedF | 1 | 4 | 1 | 2 | 1 |
| S1 | RP3 | MedF | 1 | 4 | 1 | 1 | 1 |
| S1 | RP3 | MedF | 1 | 4 | 1 | 3 | 1.1 |
| S1 | RP3 | MedF | 2 | 4 | 1 | 2 | 1.2 |
| S1 | RP3 | MedF | 2 | 4 | 1 | 1 | 1.1 |
| S1 | RP3 | MedF | 2 | 4 | 1 | 3 | 1.2 |
| S1 | RP3 | MedF | 1 | 5 | 1 | 2 | 1 |
| S1 | RP3 | MedF | 1 | 5 | 1 | 1 | 1.1 |
| S1 | RP3 | MedF | 1 | 5 | 1 | 3 | 1 |
| S1 | RP3 | MedF | 2 | 5 | 1 | 2 | 1.2 |
| S1 | RP3 | MedF | 2 | 5 | 1 | 1 | 1.1 |
| S1 | RP3 | MedF | 2 | 5 | 1 | 3 | 0.9 |
| S1 | RP3 | MedF | 1 | 1 | 1 | 2 | 0.8 |
| S1 | RP3 | MedF | 1 | 1 | 1 | 1 | 0.8 |
| S1 | RP3 | MedF | 1 | 1 | 1 | 3 | 1.1 |
| S1 | RP3 | MedF | 2 | 1 | 1 | 2 | 1 |
| S1 | RP3 | MedF | 2 | 1 | 1 | 1 | 1.7 |
| S1 | RP3 | MedF | 2 | 1 | 1 | 3 | 1 |
| S10 | RP15 | DxT | 1 | 1 | 1 | 3 | 3.2 |
| S10 | RP15 | DxT | 1 | 1 | 1 | 1 | 3.5 |
| S10 | RP15 | DxT | 1 | 1 | 1 | 2 | 3.3 |
| S10 | RP15 | DxT | 2 | 1 | 1 | 3 | 3.7 |
| S10 | RP15 | DxT | 2 | 1 | 1 | 1 | 3.7 |
| S10 | RP15 | DxT | 2 | 1 | 1 | 2 | 3.6 |
| S10 | RP15 | Kashi | 1 | 1 | 1 | 2 | 3.4 |
| S10 | RP15 | Kashi | 1 | 1 | 1 | 1 | 3.1 |
| S10 | RP15 | Kashi | 1 | 1 | 1 | 3 | 3 |
| S10 | RP15 | Kashi | 1 | 2 | 1 | 2 | 3.7 |
| S10 | RP15 | Kashi | 1 | 2 | 1 | 1 | 3.5 |
| S10 | RP15 | Kashi | 1 | 2 | 1 | 3 | 3.5 |
| S10 | RP15 | Kashi | 2 | 1 | 1 | 2 | 4 |
| S10 | RP15 | Kashi | 2 | 1 | 1 | 1 | 2.2 |
| S10 | RP15 | Kashi | 2 | 1 | 1 | 3 | 4.2 |
| S10 | RP15 | Kashi | 2 | 2 | 1 | 2 | 3.4 |
| S10 | RP15 | Kashi | 2 | 2 | 1 | 1 | 3.6 |
| S10 | RP15 | Kashi | 2 | 2 | 1 | 3 | 3.2 |
| S10 | RP15 | DxT | 2 | 2 | 1 | 3 | 3.7 |
| S10 | RP15 | DxT | 2 | 2 | 1 | 1 | 3.3 |
| S10 | RP15 | DxT | 2 | 2 | 1 | 2 | 3.7 |
| S10 | RP15 | DxT | 1 | 2 | 1 | 3 | 3.3 |
| S10 | RP15 | DxT | 1 | 2 | 1 | 1 | 3.4 |
| S10 | RP15 | DxT | 1 | 2 | 1 | 2 | 4 |
| S10 | RP15 | DxT | 2 | 1 | 2 | 3 | 3.9 |
| S10 | RP15 | DxT | 2 | 1 | 2 | 1 | 4 |
| S10 | RP15 | DxT | 2 | 1 | 2 | 2 | 3.8 |
| S10 | RP15 | DxT | 1 | 3 | 1 | 3 | 3.8 |
| S10 | RP15 | DxT | 1 | 3 | 1 | 1 | 3.4 |
| S10 | RP15 | DxT | 1 | 3 | 1 | 2 | 3.6 |
| S10 | RP15 | DxT | 1 | 3 | 2 | 3 | 3.6 |
| S10 | RP15 | DxT | 1 | 3 | 2 | 1 | 3.7 |
| S10 | RP15 | DxT | 1 | 3 | 2 | 2 | 3.3 |
| S10 | RP15 | DxT | 2 | 3 | 1 | 3 | 3.5 |
| S10 | RP15 | DxT | 2 | 3 | 1 | 1 | 3.5 |
| S10 | RP15 | DxT | 2 | 3 | 1 | 2 | 3.8 |
| S10 | RP15 | DxT | 2 | 3 | 2 | 3 | 3.5 |
| S10 | RP15 | DxT | 2 | 3 | 2 | 1 | 3.8 |
| S10 | RP15 | DxT | 2 | 3 | 2 | 2 | 3.7 |
| S10 | RP15 | Kashi | 1 | 3 | 1 | 2 | 3.4 |
| S10 | RP15 | Kashi | 1 | 3 | 1 | 1 | 3.3 |
| S10 | RP15 | Kashi | 1 | 3 | 1 | 3 | 3 |
| S10 | RP15 | Kashi | 1 | 4 | 1 | 2 | 3.7 |
| S10 | RP15 | Kashi | 1 | 4 | 1 | 1 | 4 |
| S10 | RP15 | Kashi | 1 | 4 | 1 | 3 | 3.6 |
| S10 | RP15 | Kashi | 1 | 5 | 1 | 2 | 3.5 |
| S10 | RP15 | Kashi | 1 | 5 | 1 | 1 | 3.6 |
| S10 | RP15 | Kashi | 1 | 5 | 1 | 3 | 3.6 |
| S10 | RP15 | Kashi | 2 | 3 | 1 | 2 | 3.4 |
| S10 | RP15 | Kashi | 2 | 3 | 1 | 1 | 3.4 |
| S10 | RP15 | Kashi | 2 | 3 | 1 | 3 | 3.4 |
| S10 | RP15 | Kashi | 2 | 4 | 1 | 2 | 3.1 |
| S10 | RP15 | Kashi | 2 | 4 | 1 | 1 | 3.3 |
| S10 | RP15 | Kashi | 2 | 4 | 1 | 3 | 3.3 |
| S10 | RP15 | Kashi | 2 | 5 | 1 | 2 | 4.2 |
| S10 | RP15 | Kashi | 2 | 5 | 1 | 1 | 3.5 |
| S10 | RP15 | Kashi | 2 | 5 | 1 | 3 | 3.5 |
| S10 | RP15 | DxT | 2 | 4 | 1 | 3 | 3.1 |
| S10 | RP15 | DxT | 2 | 4 | 1 | 1 | 3.2 |
| S10 | RP15 | DxT | 2 | 4 | 1 | 2 | 3.3 |
| S10 | RP15 | DxT | 2 | 4 | 2 | 3 | 3.8 |
| S10 | RP15 | DxT | 2 | 4 | 2 | 1 | 3.9 |
| S10 | RP15 | DxT | 2 | 4 | 2 | 2 | 3.2 |
| S10 | RP15 | DxT | 1 | 4 | 2 | 3 | 3.7 |
| S10 | RP15 | DxT | 1 | 4 | 2 | 1 | 3.7 |
| S10 | RP15 | DxT | 1 | 4 | 2 | 2 | 3.7 |
| S10 | RP15 | DxT | 1 | 5 | 1 | 3 | 3.5 |
| S10 | RP15 | DxT | 1 | 5 | 1 | 1 | 3.6 |
| S10 | RP15 | DxT | 1 | 5 | 1 | 2 | 3.5 |
| S10 | RP15 | DxT | 1 | 5 | 2 | 3 | 3.5 |
| S10 | RP15 | DxT | 1 | 5 | 2 | 1 | 4 |
| S10 | RP15 | DxT | 1 | 5 | 2 | 2 | 4.1 |
| S10 | RP15 | DxT | 2 | 5 | 1 | 3 | 3.4 |
| S10 | RP15 | DxT | 2 | 5 | 1 | 1 | 3.4 |
| S10 | RP15 | DxT | 2 | 5 | 1 | 2 | 3.4 |
| S10 | RP15 | DxT | 2 | 2 | 2 | 3 | 3.7 |
| S10 | RP15 | DxT | 2 | 2 | 2 | 1 | 3.9 |
| S10 | RP15 | DxT | 2 | 2 | 2 | 2 | 3.7 |
| S10 | RP15 | DxT | 1 | 2 | 2 | 3 | 4 |
| S10 | RP15 | DxT | 1 | 2 | 2 | 1 | 3.7 |
| S10 | RP15 | DxT | 1 | 2 | 2 | 2 | 3.8 |
| S10 | RP15 | DxT | 2 | 5 | 2 | 3 | 3.7 |
| S10 | RP15 | DxT | 2 | 5 | 2 | 1 | 3.3 |
| S10 | RP15 | DxT | 2 | 5 | 2 | 2 | 3.4 |
| S10 | RP15 | DxT | 1 | 4 | 1 | 3 | 3.3 |
| S10 | RP15 | DxT | 1 | 4 | 1 | 1 | 3.4 |
| S10 | RP15 | DxT | 1 | 4 | 1 | 2 | 3.2 |
| S10 | RP15 | DxT | 1 | 1 | 2 | 3 | 3.6 |
| S10 | RP15 | DxT | 1 | 1 | 2 | 1 | 4 |
| S10 | RP15 | DxT | 1 | 1 | 2 | 2 | 3.8 |
| S10 | RP15 | MedF | 2 | 3 | 1 | 3 | 3.5 |
| S10 | RP15 | MedF | 2 | 3 | 1 | 1 | 4 |
| S10 | RP15 | MedF | 2 | 3 | 1 | 2 | 4 |
| S10 | RP15 | MedF | 1 | 3 | 1 | 3 | 3.9 |
| S10 | RP15 | MedF | 1 | 3 | 1 | 1 | 3.8 |
| S10 | RP15 | MedF | 1 | 3 | 1 | 2 | 3.8 |
| S10 | RP15 | MedF | 2 | 2 | 1 | 3 | 3.4 |
| S10 | RP15 | MedF | 2 | 2 | 1 | 1 | 4 |
| S10 | RP15 | MedF | 2 | 2 | 1 | 2 | 3.7 |
| S10 | RP15 | MedF | 1 | 2 | 1 | 3 | 3.7 |
| S10 | RP15 | MedF | 1 | 2 | 1 | 1 | 3.5 |
| S10 | RP15 | MedF | 1 | 2 | 1 | 2 | 3.7 |
| S10 | RP15 | MedF | 1 | 4 | 1 | 3 | 3.9 |
| S10 | RP15 | MedF | 1 | 4 | 1 | 1 | 4 |
| S10 | RP15 | MedF | 1 | 4 | 1 | 2 | 3.9 |
| S10 | RP15 | MedF | 2 | 4 | 1 | 3 | 3.7 |
| S10 | RP15 | MedF | 2 | 4 | 1 | 1 | 3.9 |
| S10 | RP15 | MedF | 2 | 4 | 1 | 2 | 4 |
| S10 | RP15 | MedF | 1 | 5 | 1 | 3 | 3.9 |
| S10 | RP15 | MedF | 1 | 5 | 1 | 1 | 3.7 |
| S10 | RP15 | MedF | 1 | 5 | 1 | 2 | 3.7 |
| S10 | RP15 | MedF | 2 | 5 | 1 | 3 | 3.4 |
| S10 | RP15 | MedF | 2 | 5 | 1 | 1 | 4 |
| S10 | RP15 | MedF | 2 | 5 | 1 | 2 | 3.5 |
| S10 | RP15 | MedF | 1 | 1 | 1 | 3 | 3.4 |
| S10 | RP15 | MedF | 1 | 1 | 1 | 1 | 3.3 |
| S10 | RP15 | MedF | 1 | 1 | 1 | 2 | 3.2 |
| S10 | RP15 | MedF | 2 | 1 | 1 | 3 | 2.6 |
| S10 | RP15 | MedF | 2 | 1 | 1 | 1 | 3.8 |
| S10 | RP15 | MedF | 2 | 1 | 1 | 2 | 3.3 |
| S11 | RP5 | DxT | 1 | 1 | 1 | 1 | 4.4 |
| S11 | RP5 | DxT | 1 | 1 | 1 | 3 | 4.2 |
| S11 | RP5 | DxT | 1 | 1 | 1 | 2 | 4.5 |
| S11 | RP5 | DxT | 2 | 1 | 1 | 1 | 4.8 |
| S11 | RP5 | DxT | 2 | 1 | 1 | 3 | 4.4 |
| S11 | RP5 | DxT | 2 | 1 | 1 | 2 | 4.3 |
| S11 | RP5 | Kashi | 1 | 1 | 1 | 3 | 4.4 |
| S11 | RP5 | Kashi | 1 | 1 | 1 | 1 | 5 |
| S11 | RP5 | Kashi | 1 | 1 | 1 | 2 | 4.6 |
| S11 | RP5 | Kashi | 1 | 2 | 1 | 3 | 4.1 |
| S11 | RP5 | Kashi | 1 | 2 | 1 | 1 | 5.2 |
| S11 | RP5 | Kashi | 1 | 2 | 1 | 2 | 4.5 |
| S11 | RP5 | Kashi | 2 | 1 | 1 | 3 | 3.9 |
| S11 | RP5 | Kashi | 2 | 1 | 1 | 1 | 5.3 |
| S11 | RP5 | Kashi | 2 | 1 | 1 | 2 | 5.1 |
| S11 | RP5 | Kashi | 2 | 2 | 1 | 3 | 4.2 |
| S11 | RP5 | Kashi | 2 | 2 | 1 | 1 | 5.1 |
| S11 | RP5 | Kashi | 2 | 2 | 1 | 2 | 5.1 |
| S11 | RP5 | DxT | 2 | 2 | 1 | 1 | 4.5 |
| S11 | RP5 | DxT | 2 | 2 | 1 | 3 | 4.9 |
| S11 | RP5 | DxT | 2 | 2 | 1 | 2 | 3.8 |
| S11 | RP5 | DxT | 1 | 2 | 1 | 1 | 4.5 |
| S11 | RP5 | DxT | 1 | 2 | 1 | 3 | 4.3 |
| S11 | RP5 | DxT | 1 | 2 | 1 | 2 | 4.5 |
| S11 | RP5 | DxT | 2 | 1 | 2 | 1 | 4.6 |
| S11 | RP5 | DxT | 2 | 1 | 2 | 3 | 4.7 |
| S11 | RP5 | DxT | 2 | 1 | 2 | 2 | 4.7 |
| S11 | RP5 | DxT | 1 | 3 | 1 | 1 | 4.4 |
| S11 | RP5 | DxT | 1 | 3 | 1 | 3 | 4.7 |
| S11 | RP5 | DxT | 1 | 3 | 1 | 2 | 4.5 |
| S11 | RP5 | DxT | 1 | 3 | 2 | 1 | 4.7 |
| S11 | RP5 | DxT | 1 | 3 | 2 | 3 | 4.4 |
| S11 | RP5 | DxT | 2 | 3 | 1 | 1 | 5.1 |
| S11 | RP5 | DxT | 2 | 3 | 1 | 3 | 5.2 |
| S11 | RP5 | DxT | 2 | 3 | 1 | 2 | 4.5 |
| S11 | RP5 | DxT | 2 | 3 | 2 | 1 | 4.7 |
| S11 | RP5 | DxT | 2 | 3 | 2 | 3 | 4.5 |
| S11 | RP5 | DxT | 2 | 3 | 2 | 2 | 5.1 |
| S11 | RP5 | Kashi | 1 | 3 | 1 | 3 | 3.6 |
| S11 | RP5 | Kashi | 1 | 3 | 1 | 1 | 4.5 |
| S11 | RP5 | Kashi | 1 | 3 | 1 | 2 | 4.8 |
| S11 | RP5 | Kashi | 1 | 4 | 1 | 3 | 5.4 |
| S11 | RP5 | Kashi | 1 | 4 | 1 | 1 | 4.6 |
| S11 | RP5 | Kashi | 1 | 4 | 1 | 2 | 5.2 |
| S11 | RP5 | Kashi | 1 | 5 | 1 | 3 | 4.8 |
| S11 | RP5 | Kashi | 1 | 5 | 1 | 1 | 4.5 |
| S11 | RP5 | Kashi | 1 | 5 | 1 | 2 | 4.7 |
| S11 | RP5 | Kashi | 2 | 3 | 1 | 3 | 4.4 |
| S11 | RP5 | Kashi | 2 | 3 | 1 | 1 | 4.2 |
| S11 | RP5 | Kashi | 2 | 3 | 1 | 2 | 4.5 |
| S11 | RP5 | Kashi | 2 | 4 | 1 | 3 | 3.7 |
| S11 | RP5 | Kashi | 2 | 4 | 1 | 1 | 4.2 |
| S11 | RP5 | Kashi | 2 | 4 | 1 | 2 | 4.1 |
| S11 | RP5 | Kashi | 2 | 5 | 1 | 3 | 5.1 |
| S11 | RP5 | Kashi | 2 | 5 | 1 | 1 | 5 |
| S11 | RP5 | Kashi | 2 | 5 | 1 | 2 | 4.9 |
| S11 | RP5 | DxT | 2 | 4 | 1 | 1 | 4 |
| S11 | RP5 | DxT | 2 | 4 | 1 | 3 | 4.3 |
| S11 | RP5 | DxT | 2 | 4 | 1 | 2 | 4 |
| S11 | RP5 | DxT | 2 | 4 | 2 | 1 | 5 |
| S11 | RP5 | DxT | 2 | 4 | 2 | 3 | 4.9 |
| S11 | RP5 | DxT | 2 | 4 | 2 | 2 | 4.6 |
| S11 | RP5 | DxT | 1 | 4 | 2 | 1 | 4.4 |
| S11 | RP5 | DxT | 1 | 4 | 2 | 3 | 4.1 |
| S11 | RP5 | DxT | 1 | 4 | 2 | 2 | 4.5 |
| S11 | RP5 | DxT | 1 | 5 | 1 | 1 | 4.6 |
| S11 | RP5 | DxT | 1 | 5 | 1 | 3 | 4.5 |
| S11 | RP5 | DxT | 1 | 5 | 1 | 2 | 4.2 |
| S11 | RP5 | DxT | 1 | 5 | 2 | 1 | 4 |
| S11 | RP5 | DxT | 1 | 5 | 2 | 3 | 4.3 |
| S11 | RP5 | DxT | 1 | 5 | 2 | 2 | 4.6 |
| S11 | RP5 | DxT | 2 | 5 | 1 | 1 | 4.6 |
| S11 | RP5 | DxT | 2 | 5 | 1 | 3 | 4 |
| S11 | RP5 | DxT | 2 | 5 | 1 | 2 | 4.4 |
| S11 | RP5 | DxT | 2 | 2 | 2 | 1 | 4.6 |
| S11 | RP5 | DxT | 2 | 2 | 2 | 3 | 4.6 |
| S11 | RP5 | DxT | 2 | 2 | 2 | 2 | 4.6 |
| S11 | RP5 | DxT | 1 | 2 | 2 | 1 | 4.9 |
| S11 | RP5 | DxT | 1 | 2 | 2 | 3 | 5 |
| S11 | RP5 | DxT | 1 | 2 | 2 | 2 | 4.7 |
| S11 | RP5 | DxT | 2 | 5 | 2 | 1 | 4.9 |
| S11 | RP5 | DxT | 2 | 5 | 2 | 3 | 4.5 |
| S11 | RP5 | DxT | 2 | 5 | 2 | 2 | 3.9 |
| S11 | RP5 | DxT | 1 | 4 | 1 | 1 | 4.6 |
| S11 | RP5 | DxT | 1 | 4 | 1 | 3 | 3.8 |
| S11 | RP5 | DxT | 1 | 4 | 1 | 2 | 4.2 |
| S11 | RP5 | DxT | 1 | 1 | 2 | 1 | 5 |
| S11 | RP5 | DxT | 1 | 1 | 2 | 3 | 4.8 |
| S11 | RP5 | DxT | 1 | 1 | 2 | 2 | 5.1 |
| S11 | RP5 | DxT | 1 | 3 | 2 | 2 | 4.5 |
| S11 | RP5 | MedF | 2 | 3 | 1 | 1 | 5.1 |
| S11 | RP5 | MedF | 2 | 3 | 1 | 3 | 4.9 |
| S11 | RP5 | MedF | 2 | 3 | 1 | 2 | 5 |
| S11 | RP5 | MedF | 1 | 3 | 1 | 1 | 4.8 |
| S11 | RP5 | MedF | 1 | 3 | 1 | 3 | 5.3 |
| S11 | RP5 | MedF | 1 | 3 | 1 | 2 | 5.6 |
| S11 | RP5 | MedF | 2 | 2 | 1 | 1 | 5.2 |
| S11 | RP5 | MedF | 2 | 2 | 1 | 3 | 5 |
| S11 | RP5 | MedF | 2 | 2 | 1 | 2 | 5.1 |
| S11 | RP5 | MedF | 1 | 2 | 1 | 1 | 5 |
| S11 | RP5 | MedF | 1 | 2 | 1 | 3 | 4.1 |
| S11 | RP5 | MedF | 1 | 2 | 1 | 2 | 4.6 |
| S11 | RP5 | MedF | 1 | 4 | 1 | 1 | 4.6 |
| S11 | RP5 | MedF | 1 | 4 | 1 | 3 | 5.8 |
| S11 | RP5 | MedF | 1 | 4 | 1 | 2 | 4.7 |
| S11 | RP5 | MedF | 2 | 4 | 1 | 1 | 5.4 |
| S11 | RP5 | MedF | 2 | 4 | 1 | 3 | 5.7 |
| S11 | RP5 | MedF | 2 | 4 | 1 | 2 | 5.3 |
| S11 | RP5 | MedF | 1 | 5 | 1 | 1 | 4.7 |
| S11 | RP5 | MedF | 1 | 5 | 1 | 3 | 5.4 |
| S11 | RP5 | MedF | 1 | 5 | 1 | 2 | 4.8 |
| S11 | RP5 | MedF | 2 | 5 | 1 | 1 | 4.6 |
| S11 | RP5 | MedF | 2 | 5 | 1 | 3 | 5 |
| S11 | RP5 | MedF | 2 | 5 | 1 | 2 | 4.5 |
| S11 | RP5 | MedF | 1 | 1 | 1 | 1 | 3.6 |
| S11 | RP5 | MedF | 1 | 1 | 1 | 3 | 4.3 |
| S11 | RP5 | MedF | 1 | 1 | 1 | 2 | 4.5 |
| S11 | RP5 | MedF | 2 | 1 | 1 | 1 | 4.4 |
| S11 | RP5 | MedF | 2 | 1 | 1 | 3 | 4.4 |
| S11 | RP5 | MedF | 2 | 1 | 1 | 2 | 5.3 |
| S12 | RP4 | DxT | 1 | 1 | 1 | 2 | 4.8 |
| S12 | RP4 | DxT | 1 | 1 | 1 | 1 | 5.3 |
| S12 | RP4 | DxT | 1 | 1 | 1 | 3 | 4.4 |
| S12 | RP4 | DxT | 2 | 1 | 1 | 2 | 5.2 |
| S12 | RP4 | DxT | 2 | 1 | 1 | 1 | 5.1 |
| S12 | RP4 | DxT | 2 | 1 | 1 | 3 | 4.1 |
| S12 | RP4 | Kashi | 1 | 1 | 1 | 2 | 5.2 |
| S12 | RP4 | Kashi | 1 | 1 | 1 | 1 | 5.5 |
| S12 | RP4 | Kashi | 1 | 1 | 1 | 3 | 3.9 |
| S12 | RP4 | Kashi | 1 | 2 | 1 | 2 | 4.2 |
| S12 | RP4 | Kashi | 1 | 2 | 1 | 1 | 5.1 |
| S12 | RP4 | Kashi | 1 | 2 | 1 | 3 | 4.4 |
| S12 | RP4 | Kashi | 2 | 1 | 1 | 2 | 6.1 |
| S12 | RP4 | Kashi | 2 | 1 | 1 | 1 | 6 |
| S12 | RP4 | Kashi | 2 | 1 | 1 | 3 | 6 |
| S12 | RP4 | Kashi | 2 | 2 | 1 | 2 | 5.2 |
| S12 | RP4 | Kashi | 2 | 2 | 1 | 1 | 5.4 |
| S12 | RP4 | Kashi | 2 | 2 | 1 | 3 | 6.1 |
| S12 | RP4 | DxT | 2 | 2 | 1 | 2 | 5 |
| S12 | RP4 | DxT | 2 | 2 | 1 | 1 | 4.5 |
| S12 | RP4 | DxT | 2 | 2 | 1 | 3 | 5 |
| S12 | RP4 | DxT | 1 | 2 | 1 | 2 | 4.9 |
| S12 | RP4 | DxT | 1 | 2 | 1 | 1 | 4.5 |
| S12 | RP4 | DxT | 1 | 2 | 1 | 3 | 4.6 |
| S12 | RP4 | DxT | 2 | 1 | 2 | 2 | 5.6 |
| S12 | RP4 | DxT | 2 | 1 | 2 | 1 | 5.6 |
| S12 | RP4 | DxT | 2 | 1 | 2 | 3 | 5 |
| S12 | RP4 | DxT | 1 | 3 | 1 | 2 | 4.2 |
| S12 | RP4 | DxT | 1 | 3 | 1 | 1 | 5.5 |
| S12 | RP4 | DxT | 1 | 3 | 1 | 3 | 4.7 |
| S12 | RP4 | DxT | 1 | 3 | 2 | 2 | 5.2 |
| S12 | RP4 | DxT | 1 | 3 | 2 | 1 | 4.1 |
| S12 | RP4 | DxT | 1 | 3 | 2 | 3 | 4.5 |
| S12 | RP4 | DxT | 2 | 3 | 1 | 2 | 4.5 |
| S12 | RP4 | DxT | 2 | 3 | 1 | 1 | 4.5 |
| S12 | RP4 | DxT | 2 | 3 | 1 | 3 | 5.4 |
| S12 | RP4 | DxT | 2 | 3 | 2 | 2 | 5.9 |
| S12 | RP4 | DxT | 2 | 3 | 2 | 1 | 5.1 |
| S12 | RP4 | DxT | 2 | 3 | 2 | 3 | 4.4 |
| S12 | RP4 | Kashi | 1 | 3 | 1 | 2 | 4.6 |
| S12 | RP4 | Kashi | 1 | 3 | 1 | 1 | 5.7 |
| S12 | RP4 | Kashi | 1 | 3 | 1 | 3 | 4.6 |
| S12 | RP4 | Kashi | 1 | 4 | 1 | 2 | 5.8 |
| S12 | RP4 | Kashi | 1 | 4 | 1 | 1 | 5.7 |
| S12 | RP4 | Kashi | 1 | 4 | 1 | 3 | 4.5 |
| S12 | RP4 | Kashi | 1 | 5 | 1 | 2 | 4.6 |
| S12 | RP4 | Kashi | 1 | 5 | 1 | 1 | 5.4 |
| S12 | RP4 | Kashi | 1 | 5 | 1 | 3 | 5.1 |
| S12 | RP4 | Kashi | 2 | 3 | 1 | 2 | 4.1 |
| S12 | RP4 | Kashi | 2 | 3 | 1 | 1 | 6 |
| S12 | RP4 | Kashi | 2 | 3 | 1 | 3 | 4 |
| S12 | RP4 | Kashi | 2 | 4 | 1 | 2 | 4.2 |
| S12 | RP4 | Kashi | 2 | 4 | 1 | 1 | 4 |
| S12 | RP4 | Kashi | 2 | 4 | 1 | 3 | 4 |
| S12 | RP4 | Kashi | 2 | 5 | 1 | 2 | 5.6 |
| S12 | RP4 | Kashi | 2 | 5 | 1 | 1 | 4.3 |
| S12 | RP4 | Kashi | 2 | 5 | 1 | 3 | 5.3 |
| S12 | RP4 | DxT | 2 | 4 | 1 | 2 | 4.6 |
| S12 | RP4 | DxT | 2 | 4 | 1 | 1 | 4.7 |
| S12 | RP4 | DxT | 2 | 4 | 1 | 3 | 4.4 |
| S12 | RP4 | DxT | 2 | 4 | 2 | 2 | 4.5 |
| S12 | RP4 | DxT | 2 | 4 | 2 | 1 | 5.6 |
| S12 | RP4 | DxT | 2 | 4 | 2 | 3 | 4.1 |
| S12 | RP4 | DxT | 1 | 4 | 2 | 2 | 4.3 |
| S12 | RP4 | DxT | 1 | 4 | 2 | 1 | 5.2 |
| S12 | RP4 | DxT | 1 | 4 | 2 | 3 | 4.5 |
| S12 | RP4 | DxT | 1 | 5 | 1 | 2 | 4.8 |
| S12 | RP4 | DxT | 1 | 5 | 1 | 1 | 4.7 |
| S12 | RP4 | DxT | 1 | 5 | 1 | 3 | 4.4 |
| S12 | RP4 | DxT | 1 | 5 | 2 | 2 | 5.2 |
| S12 | RP4 | DxT | 1 | 5 | 2 | 1 | 4.8 |
| S12 | RP4 | DxT | 1 | 5 | 2 | 3 | 4.7 |
| S12 | RP4 | DxT | 2 | 5 | 1 | 2 | 5.1 |
| S12 | RP4 | DxT | 2 | 5 | 1 | 1 | 4.8 |
| S12 | RP4 | DxT | 2 | 5 | 1 | 3 | 5.3 |
| S12 | RP4 | DxT | 2 | 2 | 2 | 2 | 5.1 |
| S12 | RP4 | DxT | 2 | 2 | 2 | 1 | 5.4 |
| S12 | RP4 | DxT | 2 | 2 | 2 | 3 | 5.3 |
| S12 | RP4 | DxT | 1 | 2 | 2 | 2 | 5.5 |
| S12 | RP4 | DxT | 1 | 2 | 2 | 1 | 5.5 |
| S12 | RP4 | DxT | 1 | 2 | 2 | 3 | 4.8 |
| S12 | RP4 | DxT | 2 | 5 | 2 | 2 | 4.2 |
| S12 | RP4 | DxT | 2 | 5 | 2 | 1 | 4.8 |
| S12 | RP4 | DxT | 2 | 5 | 2 | 3 | 4 |
| S12 | RP4 | DxT | 1 | 4 | 1 | 2 | 4.6 |
| S12 | RP4 | DxT | 1 | 4 | 1 | 1 | 5.8 |
| S12 | RP4 | DxT | 1 | 4 | 1 | 3 | 4.3 |
| S12 | RP4 | DxT | 1 | 1 | 2 | 2 | 5.6 |
| S12 | RP4 | DxT | 1 | 1 | 2 | 1 | 5.1 |
| S12 | RP4 | DxT | 1 | 1 | 2 | 3 | 5.3 |
| S12 | RP4 | MedF | 2 | 3 | 1 | 2 | 4.5 |
| S12 | RP4 | MedF | 2 | 3 | 1 | 1 | 6.2 |
| S12 | RP4 | MedF | 2 | 3 | 1 | 3 | 5.5 |
| S12 | RP4 | MedF | 1 | 3 | 1 | 2 | 5.5 |
| S12 | RP4 | MedF | 1 | 3 | 1 | 1 | 5.7 |
| S12 | RP4 | MedF | 1 | 3 | 1 | 3 | 4.8 |
| S12 | RP4 | MedF | 2 | 2 | 1 | 2 | 4.5 |
| S12 | RP4 | MedF | 2 | 2 | 1 | 1 | 5.3 |
| S12 | RP4 | MedF | 2 | 2 | 1 | 3 | 4.9 |
| S12 | RP4 | MedF | 1 | 2 | 1 | 2 | 5.1 |
| S12 | RP4 | MedF | 1 | 2 | 1 | 1 | 5.2 |
| S12 | RP4 | MedF | 1 | 2 | 1 | 3 | 5.3 |
| S12 | RP4 | MedF | 1 | 4 | 1 | 2 | 5.7 |
| S12 | RP4 | MedF | 1 | 4 | 1 | 1 | 6.3 |
| S12 | RP4 | MedF | 1 | 4 | 1 | 3 | 6.5 |
| S12 | RP4 | MedF | 2 | 4 | 1 | 2 | 4.9 |
| S12 | RP4 | MedF | 2 | 4 | 1 | 1 | 7.2 |
| S12 | RP4 | MedF | 2 | 4 | 1 | 3 | 5.5 |
| S12 | RP4 | MedF | 1 | 5 | 1 | 2 | 4.8 |
| S12 | RP4 | MedF | 1 | 5 | 1 | 1 | 5.7 |
| S12 | RP4 | MedF | 1 | 5 | 1 | 3 | 6.1 |
| S12 | RP4 | MedF | 2 | 5 | 1 | 2 | 4.4 |
| S12 | RP4 | MedF | 2 | 5 | 1 | 1 | 4.5 |
| S12 | RP4 | MedF | 2 | 5 | 1 | 3 | 4 |
| S12 | RP4 | MedF | 1 | 1 | 1 | 2 | 3.9 |
| S12 | RP4 | MedF | 1 | 1 | 1 | 1 | 4.2 |
| S12 | RP4 | MedF | 1 | 1 | 1 | 3 | 4 |
| S12 | RP4 | MedF | 2 | 1 | 1 | 2 | 4.9 |
| S12 | RP4 | MedF | 2 | 1 | 1 | 1 | 2.4 |
| S12 | RP4 | MedF | 2 | 1 | 1 | 3 | 5.5 |
| S13 | RP6 | DxT | 1 | 1 | 1 | 1 | 5.5 |
| S13 | RP6 | DxT | 1 | 1 | 1 | 3 | 5.2 |
| S13 | RP6 | DxT | 1 | 1 | 1 | 2 | 5.5 |
| S13 | RP6 | DxT | 2 | 1 | 1 | 1 | 7.4 |
| S13 | RP6 | DxT | 2 | 1 | 1 | 3 | 5 |
| S13 | RP6 | DxT | 2 | 1 | 1 | 2 | 5.7 |
| S13 | RP6 | Kashi | 1 | 1 | 1 | 3 | 4.4 |
| S13 | RP6 | Kashi | 1 | 1 | 1 | 1 | 5.4 |
| S13 | RP6 | Kashi | 1 | 1 | 1 | 2 | 5.4 |
| S13 | RP6 | Kashi | 1 | 2 | 1 | 3 | 5.3 |
| S13 | RP6 | Kashi | 1 | 2 | 1 | 1 | 5.6 |
| S13 | RP6 | Kashi | 1 | 2 | 1 | 2 | 5.6 |
| S13 | RP6 | Kashi | 2 | 1 | 1 | 3 | 4.1 |
| S13 | RP6 | Kashi | 2 | 1 | 1 | 1 | 6.8 |
| S13 | RP6 | Kashi | 2 | 1 | 1 | 2 | 6.2 |
| S13 | RP6 | Kashi | 2 | 2 | 1 | 3 | 5.3 |
| S13 | RP6 | Kashi | 2 | 2 | 1 | 1 | 4.9 |
| S13 | RP6 | Kashi | 2 | 2 | 1 | 2 | 5.4 |
| S13 | RP6 | DxT | 2 | 2 | 1 | 1 | 5 |
| S13 | RP6 | DxT | 2 | 2 | 1 | 3 | 5.6 |
| S13 | RP6 | DxT | 2 | 2 | 1 | 2 | 5.7 |
| S13 | RP6 | DxT | 1 | 2 | 1 | 1 | 5.2 |
| S13 | RP6 | DxT | 1 | 2 | 1 | 3 | 4.9 |
| S13 | RP6 | DxT | 1 | 2 | 1 | 2 | 6.1 |
| S13 | RP6 | DxT | 2 | 1 | 2 | 1 | 7.6 |
| S13 | RP6 | DxT | 2 | 1 | 2 | 3 | 6.2 |
| S13 | RP6 | DxT | 2 | 1 | 2 | 2 | 6.3 |
| S13 | RP6 | DxT | 1 | 3 | 1 | 1 | 5.4 |
| S13 | RP6 | DxT | 1 | 3 | 1 | 3 | 5.4 |
| S13 | RP6 | DxT | 1 | 3 | 1 | 2 | 5.6 |
| S13 | RP6 | DxT | 1 | 3 | 2 | 1 | 5.6 |
| S13 | RP6 | DxT | 1 | 3 | 2 | 3 | 5.6 |
| S13 | RP6 | DxT | 1 | 3 | 2 | 2 | 5.8 |
| S13 | RP6 | DxT | 2 | 3 | 1 | 1 | 5.2 |
| S13 | RP6 | DxT | 2 | 3 | 1 | 3 | 5.9 |
| S13 | RP6 | DxT | 2 | 3 | 1 | 2 | 5.7 |
| S13 | RP6 | DxT | 2 | 3 | 2 | 1 | 5.6 |
| S13 | RP6 | DxT | 2 | 3 | 2 | 3 | 5.5 |
| S13 | RP6 | DxT | 2 | 3 | 2 | 2 | 5.7 |
| S13 | RP6 | Kashi | 1 | 3 | 1 | 3 | 4.5 |
| S13 | RP6 | Kashi | 1 | 3 | 1 | 1 | 5.1 |
| S13 | RP6 | Kashi | 1 | 3 | 1 | 2 | 5.7 |
| S13 | RP6 | Kashi | 1 | 4 | 1 | 3 | 5.2 |
| S13 | RP6 | Kashi | 1 | 4 | 1 | 1 | 5.7 |
| S13 | RP6 | Kashi | 1 | 4 | 1 | 2 | 5.9 |
| S13 | RP6 | Kashi | 1 | 5 | 1 | 3 | 5.5 |
| S13 | RP6 | Kashi | 1 | 5 | 1 | 1 | 5.3 |
| S13 | RP6 | Kashi | 1 | 5 | 1 | 2 | 5.3 |
| S13 | RP6 | Kashi | 2 | 3 | 1 | 3 | 0.8 |
| S13 | RP6 | Kashi | 2 | 3 | 1 | 1 | 5.6 |
| S13 | RP6 | Kashi | 2 | 3 | 1 | 2 | 5.4 |
| S13 | RP6 | Kashi | 2 | 4 | 1 | 3 | 4.6 |
| S13 | RP6 | Kashi | 2 | 4 | 1 | 1 | 4.7 |
| S13 | RP6 | Kashi | 2 | 4 | 1 | 2 | 4.8 |
| S13 | RP6 | Kashi | 2 | 5 | 1 | 3 | 6.1 |
| S13 | RP6 | Kashi | 2 | 5 | 1 | 1 | 5.4 |
| S13 | RP6 | Kashi | 2 | 5 | 1 | 2 | 5.6 |
| S13 | RP6 | DxT | 2 | 4 | 1 | 1 | 4.8 |
| S13 | RP6 | DxT | 2 | 4 | 1 | 3 | 5.7 |
| S13 | RP6 | DxT | 2 | 4 | 1 | 2 | 5.5 |
| S13 | RP6 | DxT | 2 | 4 | 2 | 1 | 5.7 |
| S13 | RP6 | DxT | 2 | 4 | 2 | 3 | 5.7 |
| S13 | RP6 | DxT | 2 | 4 | 2 | 2 | 5.3 |
| S13 | RP6 | DxT | 1 | 4 | 2 | 1 | 5.2 |
| S13 | RP6 | DxT | 1 | 4 | 2 | 3 | 5.6 |
| S13 | RP6 | DxT | 1 | 4 | 2 | 2 | 5.9 |
| S13 | RP6 | DxT | 1 | 5 | 1 | 1 | 5.2 |
| S13 | RP6 | DxT | 1 | 5 | 1 | 3 | 4.5 |
| S13 | RP6 | DxT | 1 | 5 | 1 | 2 | 5 |
| S13 | RP6 | DxT | 1 | 5 | 2 | 1 | 5.2 |
| S13 | RP6 | DxT | 1 | 5 | 2 | 3 | 5.6 |
| S13 | RP6 | DxT | 1 | 5 | 2 | 2 | 6.4 |
| S13 | RP6 | DxT | 2 | 5 | 1 | 1 | 8.1 |
| S13 | RP6 | DxT | 2 | 5 | 1 | 3 | 5.1 |
| S13 | RP6 | DxT | 2 | 5 | 1 | 2 | 5 |
| S13 | RP6 | DxT | 2 | 2 | 2 | 1 | 4.9 |
| S13 | RP6 | DxT | 2 | 2 | 2 | 3 | 5.4 |
| S13 | RP6 | DxT | 2 | 2 | 2 | 2 | 6.6 |
| S13 | RP6 | DxT | 1 | 2 | 2 | 1 | 5.2 |
| S13 | RP6 | DxT | 1 | 2 | 2 | 3 | 5.9 |
| S13 | RP6 | DxT | 1 | 2 | 2 | 2 | 6.7 |
| S13 | RP6 | DxT | 2 | 5 | 2 | 1 | 5.5 |
| S13 | RP6 | DxT | 2 | 5 | 2 | 3 | 5.1 |
| S13 | RP6 | DxT | 2 | 5 | 2 | 2 | 5 |
| S13 | RP6 | DxT | 1 | 4 | 1 | 1 | 5.6 |
| S13 | RP6 | DxT | 1 | 4 | 1 | 3 | 4.8 |
| S13 | RP6 | DxT | 1 | 4 | 1 | 2 | 5.1 |
| S13 | RP6 | DxT | 1 | 1 | 2 | 1 | 5.5 |
| S13 | RP6 | DxT | 1 | 1 | 2 | 3 | 6.1 |
| S13 | RP6 | DxT | 1 | 1 | 2 | 2 | 5.9 |
| S13 | RP6 | MedF | 2 | 3 | 1 | 1 | 6.4 |
| S13 | RP6 | MedF | 2 | 3 | 1 | 3 | 5.3 |
| S13 | RP6 | MedF | 2 | 3 | 1 | 2 | 6.3 |
| S13 | RP6 | MedF | 1 | 3 | 1 | 1 | 6.1 |
| S13 | RP6 | MedF | 1 | 3 | 1 | 3 | 5.8 |
| S13 | RP6 | MedF | 1 | 3 | 1 | 2 | 5.5 |
| S13 | RP6 | MedF | 2 | 2 | 1 | 1 | 5.8 |
| S13 | RP6 | MedF | 2 | 2 | 1 | 3 | 4.8 |
| S13 | RP6 | MedF | 2 | 2 | 1 | 2 | 6 |
| S13 | RP6 | MedF | 1 | 2 | 1 | 1 | 5.5 |
| S13 | RP6 | MedF | 1 | 2 | 1 | 3 | 5.5 |
| S13 | RP6 | MedF | 1 | 2 | 1 | 2 | 5.8 |
| S13 | RP6 | MedF | 1 | 4 | 1 | 1 | 6.1 |
| S13 | RP6 | MedF | 1 | 4 | 1 | 3 | 6 |
| S13 | RP6 | MedF | 1 | 4 | 1 | 2 | 6.6 |
| S13 | RP6 | MedF | 2 | 4 | 1 | 1 | 6 |
| S13 | RP6 | MedF | 2 | 4 | 1 | 3 | 5.8 |
| S13 | RP6 | MedF | 2 | 4 | 1 | 2 | 6.4 |
| S13 | RP6 | MedF | 1 | 5 | 1 | 1 | 6.4 |
| S13 | RP6 | MedF | 1 | 5 | 1 | 3 | 5.7 |
| S13 | RP6 | MedF | 1 | 5 | 1 | 2 | 5.8 |
| S13 | RP6 | MedF | 2 | 5 | 1 | 1 | 5.5 |
| S13 | RP6 | MedF | 2 | 5 | 1 | 3 | 5.6 |
| S13 | RP6 | MedF | 2 | 5 | 1 | 2 | 6.1 |
| S13 | RP6 | MedF | 1 | 1 | 1 | 1 | 4.6 |
| S13 | RP6 | MedF | 1 | 1 | 1 | 3 | 5.5 |
| S13 | RP6 | MedF | 1 | 1 | 1 | 2 | 5.4 |
| S13 | RP6 | MedF | 2 | 1 | 1 | 1 | 5.2 |
| S13 | RP6 | MedF | 2 | 1 | 1 | 3 | 4.5 |
| S13 | RP6 | MedF | 2 | 1 | 1 | 2 | 5.2 |
| S14 | RP25 | DxT | 1 | 1 | 1 | 2 | 5.1 |
| S14 | RP25 | DxT | 1 | 1 | 1 | 3 | 5.5 |
| S14 | RP25 | DxT | 1 | 1 | 1 | 1 | 5.9 |
| S14 | RP25 | DxT | 2 | 1 | 1 | 2 | 5.8 |
| S14 | RP25 | DxT | 2 | 1 | 1 | 3 | 5.5 |
| S14 | RP25 | DxT | 2 | 1 | 1 | 1 | 5.9 |
| S14 | RP25 | Kashi | 1 | 1 | 1 | 2 | 5.1 |
| S14 | RP25 | Kashi | 1 | 1 | 1 | 3 | 6.2 |
| S14 | RP25 | Kashi | 1 | 1 | 1 | 1 | 5.9 |
| S14 | RP25 | Kashi | 1 | 2 | 1 | 2 | 6 |
| S14 | RP25 | Kashi | 1 | 2 | 1 | 3 | 6.3 |
| S14 | RP25 | Kashi | 1 | 2 | 1 | 1 | 5.9 |
| S14 | RP25 | Kashi | 2 | 1 | 1 | 2 | 6.5 |
| S14 | RP25 | Kashi | 2 | 1 | 1 | 3 | 6.4 |
| S14 | RP25 | Kashi | 2 | 1 | 1 | 1 | 6 |
| S14 | RP25 | Kashi | 2 | 2 | 1 | 2 | 5.8 |
| S14 | RP25 | Kashi | 2 | 2 | 1 | 3 | 5.8 |
| S14 | RP25 | Kashi | 2 | 2 | 1 | 1 | 5.9 |
| S14 | RP25 | DxT | 2 | 2 | 1 | 2 | 5.5 |
| S14 | RP25 | DxT | 2 | 2 | 1 | 3 | 5.3 |
| S14 | RP25 | DxT | 2 | 2 | 1 | 1 | 6 |
| S14 | RP25 | DxT | 1 | 2 | 1 | 2 | 5.6 |
| S14 | RP25 | DxT | 1 | 2 | 1 | 3 | 5.2 |
| S14 | RP25 | DxT | 1 | 2 | 1 | 1 | 5.5 |
| S14 | RP25 | DxT | 2 | 1 | 2 | 2 | 6.3 |
| S14 | RP25 | DxT | 2 | 1 | 2 | 3 | 5.6 |
| S14 | RP25 | DxT | 2 | 1 | 2 | 1 | 5.9 |
| S14 | RP25 | DxT | 1 | 3 | 1 | 2 | 5.5 |
| S14 | RP25 | DxT | 1 | 3 | 1 | 3 | 5.4 |
| S14 | RP25 | DxT | 1 | 3 | 1 | 1 | 5.9 |
| S14 | RP25 | DxT | 1 | 3 | 2 | 2 | 6 |
| S14 | RP25 | DxT | 1 | 3 | 2 | 3 | 5.2 |
| S14 | RP25 | DxT | 1 | 3 | 2 | 1 | 9.5 |
| S14 | RP25 | DxT | 2 | 3 | 1 | 2 | 5.8 |
| S14 | RP25 | DxT | 2 | 3 | 1 | 3 | 5.5 |
| S14 | RP25 | DxT | 2 | 3 | 1 | 1 | 6.1 |
| S14 | RP25 | DxT | 2 | 3 | 2 | 2 | 5.6 |
| S14 | RP25 | DxT | 2 | 3 | 2 | 3 | 6.2 |
| S14 | RP25 | DxT | 2 | 3 | 2 | 1 | 6.1 |
| S14 | RP25 | Kashi | 1 | 3 | 1 | 2 | 5.6 |
| S14 | RP25 | Kashi | 1 | 3 | 1 | 3 | 5.1 |
| S14 | RP25 | Kashi | 1 | 3 | 1 | 1 | 5.4 |
| S14 | RP25 | Kashi | 1 | 4 | 1 | 2 | 5.8 |
| S14 | RP25 | Kashi | 1 | 4 | 1 | 3 | 5.8 |
| S14 | RP25 | Kashi | 1 | 4 | 1 | 1 | 6.2 |
| S14 | RP25 | Kashi | 1 | 5 | 1 | 2 | 5.6 |
| S14 | RP25 | Kashi | 1 | 5 | 1 | 3 | 6 |
| S14 | RP25 | Kashi | 1 | 5 | 1 | 1 | 6.1 |
| S14 | RP25 | Kashi | 2 | 3 | 1 | 2 | 5.5 |
| S14 | RP25 | Kashi | 2 | 3 | 1 | 3 | 2.8 |
| S14 | RP25 | Kashi | 2 | 3 | 1 | 1 | 5.9 |
| S14 | RP25 | Kashi | 2 | 4 | 1 | 2 | 5.8 |
| S14 | RP25 | Kashi | 2 | 4 | 1 | 3 | 5.4 |
| S14 | RP25 | Kashi | 2 | 4 | 1 | 1 | 5.1 |
| S14 | RP25 | Kashi | 2 | 5 | 1 | 2 | 5.2 |
| S14 | RP25 | Kashi | 2 | 5 | 1 | 3 | 6.3 |
| S14 | RP25 | Kashi | 2 | 5 | 1 | 1 | 5.9 |
| S14 | RP25 | DxT | 2 | 4 | 1 | 2 | 5.6 |
| S14 | RP25 | DxT | 2 | 4 | 1 | 3 | 5.1 |
| S14 | RP25 | DxT | 2 | 4 | 1 | 1 | 5.2 |
| S14 | RP25 | DxT | 2 | 4 | 2 | 2 | 5.4 |
| S14 | RP25 | DxT | 2 | 4 | 2 | 3 | 5.3 |
| S14 | RP25 | DxT | 2 | 4 | 2 | 1 | 5.4 |
| S14 | RP25 | DxT | 1 | 4 | 2 | 2 | 5.5 |
| S14 | RP25 | DxT | 1 | 4 | 2 | 3 | 5.4 |
| S14 | RP25 | DxT | 1 | 4 | 2 | 1 | 5.5 |
| S14 | RP25 | DxT | 1 | 5 | 1 | 2 | 5.7 |
| S14 | RP25 | DxT | 1 | 5 | 1 | 3 | 5.1 |
| S14 | RP25 | DxT | 1 | 5 | 1 | 1 | 5.4 |
| S14 | RP25 | DxT | 1 | 5 | 2 | 2 | 5.6 |
| S14 | RP25 | DxT | 1 | 5 | 2 | 3 | 5.7 |
| S14 | RP25 | DxT | 1 | 5 | 2 | 1 | 6.2 |
| S14 | RP25 | DxT | 2 | 5 | 1 | 2 | 5.5 |
| S14 | RP25 | DxT | 2 | 5 | 1 | 3 | 5.8 |
| S14 | RP25 | DxT | 2 | 5 | 1 | 1 | 5.4 |
| S14 | RP25 | DxT | 2 | 2 | 2 | 2 | 5.5 |
| S14 | RP25 | DxT | 2 | 2 | 2 | 3 | 5.7 |
| S14 | RP25 | DxT | 2 | 2 | 2 | 1 | 5.9 |
| S14 | RP25 | DxT | 1 | 2 | 2 | 2 | 5.7 |
| S14 | RP25 | DxT | 1 | 2 | 2 | 3 | 5.8 |
| S14 | RP25 | DxT | 1 | 2 | 2 | 1 | 5.6 |
| S14 | RP25 | DxT | 2 | 5 | 2 | 2 | 5.5 |
| S14 | RP25 | DxT | 2 | 5 | 2 | 3 | 5.8 |
| S14 | RP25 | DxT | 2 | 5 | 2 | 1 | 5.2 |
| S14 | RP25 | DxT | 1 | 4 | 1 | 2 | 5.5 |
| S14 | RP25 | DxT | 1 | 4 | 1 | 3 | 5.3 |
| S14 | RP25 | DxT | 1 | 4 | 1 | 1 | 5.5 |
| S14 | RP25 | DxT | 1 | 1 | 2 | 2 | 5.5 |
| S14 | RP25 | DxT | 1 | 1 | 2 | 3 | 5.4 |
| S14 | RP25 | DxT | 1 | 1 | 2 | 1 | 5.9 |
| S14 | RP25 | MedF | 2 | 3 | 1 | 2 | 6.6 |
| S14 | RP25 | MedF | 2 | 3 | 1 | 3 | 5.8 |
| S14 | RP25 | MedF | 2 | 3 | 1 | 1 | 5.9 |
| S14 | RP25 | MedF | 1 | 3 | 1 | 2 | 6.1 |
| S14 | RP25 | MedF | 1 | 3 | 1 | 3 | 6.3 |
| S14 | RP25 | MedF | 1 | 3 | 1 | 1 | 6.1 |
| S14 | RP25 | MedF | 2 | 2 | 1 | 2 | 6 |
| S14 | RP25 | MedF | 2 | 2 | 1 | 3 | 4.7 |
| S14 | RP25 | MedF | 2 | 2 | 1 | 1 | 6.9 |
| S14 | RP25 | MedF | 1 | 2 | 1 | 2 | 5.6 |
| S14 | RP25 | MedF | 1 | 2 | 1 | 3 | 5.4 |
| S14 | RP25 | MedF | 1 | 2 | 1 | 1 | 5.4 |
| S14 | RP25 | MedF | 1 | 4 | 1 | 2 | 5.5 |
| S14 | RP25 | MedF | 1 | 4 | 1 | 3 | 6 |
| S14 | RP25 | MedF | 1 | 4 | 1 | 1 | 5.9 |
| S14 | RP25 | MedF | 2 | 4 | 1 | 2 | 6.9 |
| S14 | RP25 | MedF | 2 | 4 | 1 | 3 | 5.7 |
| S14 | RP25 | MedF | 2 | 4 | 1 | 1 | 6.4 |
| S14 | RP25 | MedF | 1 | 5 | 1 | 2 | 5.5 |
| S14 | RP25 | MedF | 1 | 5 | 1 | 3 | 6.1 |
| S14 | RP25 | MedF | 1 | 5 | 1 | 1 | 5.4 |
| S14 | RP25 | MedF | 2 | 5 | 1 | 2 | 5.4 |
| S14 | RP25 | MedF | 2 | 5 | 1 | 3 | 5.1 |
| S14 | RP25 | MedF | 2 | 5 | 1 | 1 | 5.5 |
| S14 | RP25 | MedF | 1 | 1 | 1 | 2 | 5.6 |
| S14 | RP25 | MedF | 1 | 1 | 1 | 3 | 5.9 |
| S14 | RP25 | MedF | 1 | 1 | 1 | 1 | 5.2 |
| S14 | RP25 | MedF | 2 | 1 | 1 | 2 | 6.3 |
| S14 | RP25 | MedF | 2 | 1 | 1 | 3 | 4.9 |
| S14 | RP25 | MedF | 2 | 1 | 1 | 1 | 5.4 |
| S15 | RP9 | DxT | 1 | 1 | 1 | 2 | 5.8 |
| S15 | RP9 | DxT | 1 | 1 | 1 | 1 | 6.2 |
| S15 | RP9 | DxT | 1 | 1 | 1 | 3 | 6 |
| S15 | RP9 | DxT | 2 | 1 | 1 | 2 | 5.6 |
| S15 | RP9 | DxT | 2 | 1 | 1 | 1 | 6.4 |
| S15 | RP9 | DxT | 2 | 1 | 1 | 3 | 6.4 |
| S15 | RP9 | Kashi | 1 | 1 | 1 | 2 | 6.7 |
| S15 | RP9 | Kashi | 1 | 1 | 1 | 3 | 6.2 |
| S15 | RP9 | Kashi | 1 | 1 | 1 | 1 | 5.8 |
| S15 | RP9 | Kashi | 1 | 2 | 1 | 2 | 6.6 |
| S15 | RP9 | Kashi | 1 | 2 | 1 | 3 | 6.1 |
| S15 | RP9 | Kashi | 1 | 2 | 1 | 1 | 6.9 |
| S15 | RP9 | Kashi | 2 | 1 | 1 | 2 | 6.7 |
| S15 | RP9 | Kashi | 2 | 1 | 1 | 3 | 4.7 |
| S15 | RP9 | Kashi | 2 | 1 | 1 | 1 | 7.2 |
| S15 | RP9 | Kashi | 2 | 2 | 1 | 2 | 6.6 |
| S15 | RP9 | Kashi | 2 | 2 | 1 | 3 | 7.1 |
| S15 | RP9 | Kashi | 2 | 2 | 1 | 1 | 6.4 |
| S15 | RP9 | DxT | 2 | 2 | 1 | 2 | 6 |
| S15 | RP9 | DxT | 2 | 2 | 1 | 1 | 7.4 |
| S15 | RP9 | DxT | 2 | 2 | 1 | 3 | 6.2 |
| S15 | RP9 | DxT | 1 | 2 | 1 | 2 | 6 |
| S15 | RP9 | DxT | 1 | 2 | 1 | 1 | 5.8 |
| S15 | RP9 | DxT | 1 | 2 | 1 | 3 | 6.1 |
| S15 | RP9 | DxT | 2 | 1 | 2 | 2 | 6.6 |
| S15 | RP9 | DxT | 2 | 1 | 2 | 1 | 6.5 |
| S15 | RP9 | DxT | 2 | 1 | 2 | 3 | 6.8 |
| S15 | RP9 | DxT | 1 | 3 | 1 | 2 | 6.3 |
| S15 | RP9 | DxT | 1 | 3 | 1 | 1 | 5.7 |
| S15 | RP9 | DxT | 1 | 3 | 1 | 3 | 6.3 |
| S15 | RP9 | DxT | 1 | 3 | 2 | 2 | 6.5 |
| S15 | RP9 | DxT | 1 | 3 | 2 | 1 | 6.2 |
| S15 | RP9 | DxT | 1 | 3 | 2 | 3 | 6.7 |
| S15 | RP9 | DxT | 2 | 3 | 1 | 2 | 6.7 |
| S15 | RP9 | DxT | 2 | 3 | 1 | 1 | 5.9 |
| S15 | RP9 | DxT | 2 | 3 | 1 | 3 | 6.3 |
| S15 | RP9 | DxT | 2 | 3 | 2 | 2 | 6.9 |
| S15 | RP9 | DxT | 2 | 3 | 2 | 1 | 6.3 |
| S15 | RP9 | DxT | 2 | 3 | 2 | 3 | 6.2 |
| S15 | RP9 | Kashi | 1 | 3 | 1 | 2 | 5.7 |
| S15 | RP9 | Kashi | 1 | 3 | 1 | 3 | 6.4 |
| S15 | RP9 | Kashi | 1 | 3 | 1 | 1 | 6.4 |
| S15 | RP9 | Kashi | 1 | 4 | 1 | 2 | 7 |
| S15 | RP9 | Kashi | 1 | 4 | 1 | 3 | 6.2 |
| S15 | RP9 | Kashi | 1 | 4 | 1 | 1 | 6.2 |
| S15 | RP9 | Kashi | 1 | 5 | 1 | 2 | 6.6 |
| S15 | RP9 | Kashi | 1 | 5 | 1 | 3 | 6.1 |
| S15 | RP9 | Kashi | 1 | 5 | 1 | 1 | 6.8 |
| S15 | RP9 | Kashi | 2 | 3 | 1 | 2 | 6.1 |
| S15 | RP9 | Kashi | 2 | 3 | 1 | 3 | 2.6 |
| S15 | RP9 | Kashi | 2 | 3 | 1 | 1 | 6.1 |
| S15 | RP9 | Kashi | 2 | 4 | 1 | 2 | 6.1 |
| S15 | RP9 | Kashi | 2 | 4 | 1 | 3 | 6.3 |
| S15 | RP9 | Kashi | 2 | 4 | 1 | 1 | 4.9 |
| S15 | RP9 | Kashi | 2 | 5 | 1 | 2 | 6.7 |
| S15 | RP9 | Kashi | 2 | 5 | 1 | 3 | 6.9 |
| S15 | RP9 | Kashi | 2 | 5 | 1 | 1 | 6.6 |
| S15 | RP9 | DxT | 2 | 4 | 1 | 2 | 6 |
| S15 | RP9 | DxT | 2 | 4 | 1 | 1 | 6.1 |
| S15 | RP9 | DxT | 2 | 4 | 1 | 3 | 5.9 |
| S15 | RP9 | DxT | 2 | 4 | 2 | 2 | 6 |
| S15 | RP9 | DxT | 2 | 4 | 2 | 1 | 6.4 |
| S15 | RP9 | DxT | 2 | 4 | 2 | 3 | 6 |
| S15 | RP9 | DxT | 1 | 4 | 2 | 2 | 5.3 |
| S15 | RP9 | DxT | 1 | 4 | 2 | 1 | 6.3 |
| S15 | RP9 | DxT | 1 | 4 | 2 | 3 | 6.6 |
| S15 | RP9 | DxT | 1 | 5 | 1 | 2 | 6 |
| S15 | RP9 | DxT | 1 | 5 | 1 | 1 | 6.3 |
| S15 | RP9 | DxT | 1 | 5 | 1 | 3 | 5.7 |
| S15 | RP9 | DxT | 1 | 5 | 2 | 2 | 6.2 |
| S15 | RP9 | DxT | 1 | 5 | 2 | 1 | 6.4 |
| S15 | RP9 | DxT | 1 | 5 | 2 | 3 | 6.6 |
| S15 | RP9 | DxT | 2 | 5 | 1 | 2 | 6.5 |
| S15 | RP9 | DxT | 2 | 5 | 1 | 1 | 6.9 |
| S15 | RP9 | DxT | 2 | 5 | 1 | 3 | 6.4 |
| S15 | RP9 | DxT | 2 | 2 | 2 | 2 | 6.5 |
| S15 | RP9 | DxT | 2 | 2 | 2 | 1 | 6.4 |
| S15 | RP9 | DxT | 2 | 2 | 2 | 3 | 6.3 |
| S15 | RP9 | DxT | 1 | 2 | 2 | 2 | 6.9 |
| S15 | RP9 | DxT | 1 | 2 | 2 | 1 | 6.7 |
| S15 | RP9 | DxT | 1 | 2 | 2 | 3 | 6.7 |
| S15 | RP9 | DxT | 2 | 5 | 2 | 2 | 6.1 |
| S15 | RP9 | DxT | 2 | 5 | 2 | 1 | 5.8 |
| S15 | RP9 | DxT | 2 | 5 | 2 | 3 | 6.3 |
| S15 | RP9 | DxT | 1 | 4 | 1 | 2 | 5.9 |
| S15 | RP9 | DxT | 1 | 4 | 1 | 1 | 6.5 |
| S15 | RP9 | DxT | 1 | 4 | 1 | 3 | 6.1 |
| S15 | RP9 | DxT | 1 | 1 | 2 | 2 | 6.3 |
| S15 | RP9 | DxT | 1 | 1 | 2 | 1 | 6 |
| S15 | RP9 | DxT | 1 | 1 | 2 | 3 | 6.4 |
| S15 | RP9 | MedF | 2 | 3 | 1 | 2 | 6.3 |
| S15 | RP9 | MedF | 2 | 3 | 1 | 1 | 7 |
| S15 | RP9 | MedF | 2 | 3 | 1 | 3 | 6.3 |
| S15 | RP9 | MedF | 1 | 3 | 1 | 2 | 6.7 |
| S15 | RP9 | MedF | 1 | 3 | 1 | 1 | 7 |
| S15 | RP9 | MedF | 1 | 3 | 1 | 3 | 7 |
| S15 | RP9 | MedF | 2 | 2 | 1 | 2 | 6.7 |
| S15 | RP9 | MedF | 2 | 2 | 1 | 1 | 6.3 |
| S15 | RP9 | MedF | 2 | 2 | 1 | 3 | 6.5 |
| S15 | RP9 | MedF | 1 | 2 | 1 | 2 | 6.5 |
| S15 | RP9 | MedF | 1 | 2 | 1 | 1 | 6.2 |
| S15 | RP9 | MedF | 1 | 2 | 1 | 3 | 7 |
| S15 | RP9 | MedF | 1 | 4 | 1 | 2 | 6.4 |
| S15 | RP9 | MedF | 1 | 4 | 1 | 1 | 6.7 |
| S15 | RP9 | MedF | 1 | 4 | 1 | 3 | 6.3 |
| S15 | RP9 | MedF | 2 | 4 | 1 | 2 | 7 |
| S15 | RP9 | MedF | 2 | 4 | 1 | 1 | 7.6 |
| S15 | RP9 | MedF | 2 | 4 | 1 | 3 | 6 |
| S15 | RP9 | MedF | 1 | 5 | 1 | 2 | 5.7 |
| S15 | RP9 | MedF | 1 | 5 | 1 | 1 | 6.7 |
| S15 | RP9 | MedF | 1 | 5 | 1 | 3 | 6.6 |
| S15 | RP9 | MedF | 2 | 5 | 1 | 2 | 6.6 |
| S15 | RP9 | MedF | 2 | 5 | 1 | 1 | 6 |
| S15 | RP9 | MedF | 2 | 5 | 1 | 3 | 6 |
| S15 | RP9 | MedF | 1 | 1 | 1 | 2 | 5.9 |
| S15 | RP9 | MedF | 1 | 1 | 1 | 1 | 6.2 |
| S15 | RP9 | MedF | 1 | 1 | 1 | 3 | 6.3 |
| S15 | RP9 | MedF | 2 | 1 | 1 | 2 | 5.4 |
| S15 | RP9 | MedF | 2 | 1 | 1 | 1 | 5.6 |
| S15 | RP9 | MedF | 2 | 1 | 1 | 3 | 5.2 |
| S16 | RP26 | DxT | 1 | 1 | 1 | 2 | 6 |
| S16 | RP26 | DxT | 1 | 1 | 1 | 3 | 5.8 |
| S16 | RP26 | DxT | 1 | 1 | 1 | 1 | 6 |
| S16 | RP26 | DxT | 2 | 1 | 1 | 2 | 6.9 |
| S16 | RP26 | DxT | 2 | 1 | 1 | 3 | 6.2 |
| S16 | RP26 | DxT | 2 | 1 | 1 | 1 | 6.4 |
| S16 | RP26 | Kashi | 1 | 1 | 1 | 3 | 5.4 |
| S16 | RP26 | Kashi | 1 | 1 | 1 | 1 | 6.4 |
| S16 | RP26 | Kashi | 1 | 1 | 1 | 2 | 6.5 |
| S16 | RP26 | Kashi | 1 | 2 | 1 | 3 | 6.8 |
| S16 | RP26 | Kashi | 1 | 2 | 1 | 1 | 6.6 |
| S16 | RP26 | Kashi | 1 | 2 | 1 | 2 | 6.6 |
| S16 | RP26 | Kashi | 2 | 1 | 1 | 3 | 6.7 |
| S16 | RP26 | Kashi | 2 | 1 | 1 | 1 | 6.4 |
| S16 | RP26 | Kashi | 2 | 2 | 1 | 3 | 6.8 |
| S16 | RP26 | Kashi | 2 | 2 | 1 | 1 | 6 |
| S16 | RP26 | Kashi | 2 | 2 | 1 | 2 | 6.9 |
| S16 | RP26 | DxT | 2 | 2 | 1 | 2 | 6.3 |
| S16 | RP26 | DxT | 2 | 2 | 1 | 3 | 6.5 |
| S16 | RP26 | DxT | 2 | 2 | 1 | 1 | 5.9 |
| S16 | RP26 | DxT | 1 | 2 | 1 | 2 | 6.2 |
| S16 | RP26 | DxT | 1 | 2 | 1 | 3 | 6 |
| S16 | RP26 | DxT | 1 | 2 | 1 | 1 | 6 |
| S16 | RP26 | DxT | 2 | 1 | 2 | 2 | 6 |
| S16 | RP26 | DxT | 2 | 1 | 2 | 3 | 6.5 |
| S16 | RP26 | DxT | 2 | 1 | 2 | 1 | 6 |
| S16 | RP26 | DxT | 1 | 3 | 1 | 2 | 6.8 |
| S16 | RP26 | DxT | 1 | 3 | 1 | 3 | 6.1 |
| S16 | RP26 | DxT | 1 | 3 | 1 | 1 | 6.2 |
| S16 | RP26 | DxT | 1 | 3 | 2 | 2 | 6 |
| S16 | RP26 | DxT | 1 | 3 | 2 | 3 | 5.7 |
| S16 | RP26 | DxT | 1 | 3 | 2 | 1 | 6.3 |
| S16 | RP26 | DxT | 2 | 3 | 1 | 2 | 6.4 |
| S16 | RP26 | DxT | 2 | 3 | 1 | 3 | 6.7 |
| S16 | RP26 | DxT | 2 | 3 | 1 | 1 | 6.7 |
| S16 | RP26 | DxT | 2 | 3 | 2 | 2 | 6.5 |
| S16 | RP26 | DxT | 2 | 3 | 2 | 3 | 6.3 |
| S16 | RP26 | DxT | 2 | 3 | 2 | 1 | 6.2 |
| S16 | RP26 | Kashi | 1 | 3 | 1 | 3 | 6 |
| S16 | RP26 | Kashi | 1 | 3 | 1 | 1 | 5.6 |
| S16 | RP26 | Kashi | 1 | 3 | 1 | 2 | 6 |
| S16 | RP26 | Kashi | 1 | 4 | 1 | 3 | 6.2 |
| S16 | RP26 | Kashi | 1 | 4 | 1 | 1 | 6.5 |
| S16 | RP26 | Kashi | 1 | 4 | 1 | 2 | 6.1 |
| S16 | RP26 | Kashi | 1 | 5 | 1 | 3 | 6.5 |
| S16 | RP26 | Kashi | 1 | 5 | 1 | 1 | 6.7 |
| S16 | RP26 | Kashi | 1 | 5 | 1 | 2 | 5.9 |
| S16 | RP26 | Kashi | 2 | 3 | 1 | 3 | 5.9 |
| S16 | RP26 | Kashi | 2 | 3 | 1 | 1 | 6.5 |
| S16 | RP26 | Kashi | 2 | 3 | 1 | 2 | 5.9 |
| S16 | RP26 | Kashi | 2 | 4 | 1 | 3 | 5.8 |
| S16 | RP26 | Kashi | 2 | 4 | 1 | 1 | 6.7 |
| S16 | RP26 | Kashi | 2 | 4 | 1 | 2 | 6 |
| S16 | RP26 | Kashi | 2 | 5 | 1 | 3 | 6.4 |
| S16 | RP26 | Kashi | 2 | 5 | 1 | 1 | 6.2 |
| S16 | RP26 | Kashi | 2 | 5 | 1 | 2 | 6.1 |
| S16 | RP26 | DxT | 2 | 4 | 1 | 2 | 5.8 |
| S16 | RP26 | DxT | 2 | 4 | 1 | 3 | 6.2 |
| S16 | RP26 | DxT | 2 | 4 | 1 | 1 | 6.1 |
| S16 | RP26 | DxT | 2 | 4 | 2 | 2 | 6.3 |
| S16 | RP26 | DxT | 2 | 4 | 2 | 3 | 5.8 |
| S16 | RP26 | DxT | 2 | 4 | 2 | 1 | 6.7 |
| S16 | RP26 | DxT | 1 | 4 | 2 | 2 | 6.8 |
| S16 | RP26 | DxT | 1 | 4 | 2 | 3 | 6.2 |
| S16 | RP26 | DxT | 1 | 4 | 2 | 1 | 6.4 |
| S16 | RP26 | DxT | 1 | 5 | 1 | 2 | 6.2 |
| S16 | RP26 | DxT | 1 | 5 | 1 | 3 | 5.9 |
| S16 | RP26 | DxT | 1 | 5 | 1 | 1 | 6 |
| S16 | RP26 | DxT | 1 | 5 | 2 | 2 | 6.5 |
| S16 | RP26 | DxT | 1 | 5 | 2 | 3 | 6.7 |
| S16 | RP26 | DxT | 1 | 5 | 2 | 1 | 6.4 |
| S16 | RP26 | DxT | 2 | 5 | 1 | 2 | 5.9 |
| S16 | RP26 | DxT | 2 | 5 | 1 | 3 | 6.4 |
| S16 | RP26 | DxT | 2 | 5 | 1 | 1 | 6.5 |
| S16 | RP26 | DxT | 2 | 2 | 2 | 2 | 6.6 |
| S16 | RP26 | DxT | 2 | 2 | 2 | 3 | 6 |
| S16 | RP26 | DxT | 2 | 2 | 2 | 1 | 6.6 |
| S16 | RP26 | DxT | 1 | 2 | 2 | 2 | 6 |
| S16 | RP26 | DxT | 1 | 2 | 2 | 3 | 6.5 |
| S16 | RP26 | DxT | 1 | 2 | 2 | 1 | 6.2 |
| S16 | RP26 | DxT | 2 | 5 | 2 | 2 | 5.7 |
| S16 | RP26 | DxT | 2 | 5 | 2 | 3 | 5.9 |
| S16 | RP26 | DxT | 2 | 5 | 2 | 1 | 6.2 |
| S16 | RP26 | DxT | 1 | 4 | 1 | 2 | 6.4 |
| S16 | RP26 | DxT | 1 | 4 | 1 | 3 | 6.2 |
| S16 | RP26 | DxT | 1 | 4 | 1 | 1 | 6.7 |
| S16 | RP26 | DxT | 1 | 1 | 2 | 2 | 5.9 |
| S16 | RP26 | DxT | 1 | 1 | 2 | 3 | 6.9 |
| S16 | RP26 | DxT | 1 | 1 | 2 | 1 | 6.7 |
| S16 | RP26 | Kashi | 2 | 1 | 1 | 2 | 7.3 |
| S16 | RP26 | MedF | 2 | 3 | 1 | 2 | 6.2 |
| S16 | RP26 | MedF | 2 | 3 | 1 | 3 | 6.3 |
| S16 | RP26 | MedF | 2 | 3 | 1 | 1 | 6.2 |
| S16 | RP26 | MedF | 1 | 3 | 1 | 2 | 6.7 |
| S16 | RP26 | MedF | 1 | 3 | 1 | 3 | 6.8 |
| S16 | RP26 | MedF | 1 | 3 | 1 | 1 | 6.2 |
| S16 | RP26 | MedF | 2 | 2 | 1 | 2 | 6.6 |
| S16 | RP26 | MedF | 2 | 2 | 1 | 3 | 7.3 |
| S16 | RP26 | MedF | 2 | 2 | 1 | 1 | 7.9 |
| S16 | RP26 | MedF | 1 | 2 | 1 | 2 | 6.1 |
| S16 | RP26 | MedF | 1 | 2 | 1 | 3 | 6.3 |
| S16 | RP26 | MedF | 1 | 2 | 1 | 1 | 6.1 |
| S16 | RP26 | MedF | 1 | 4 | 1 | 2 | 6.6 |
| S16 | RP26 | MedF | 1 | 4 | 1 | 3 | 6.8 |
| S16 | RP26 | MedF | 1 | 4 | 1 | 1 | 6.5 |
| S16 | RP26 | MedF | 2 | 4 | 1 | 2 | 6.7 |
| S16 | RP26 | MedF | 2 | 4 | 1 | 3 | 6 |
| S16 | RP26 | MedF | 2 | 4 | 1 | 1 | 6.5 |
| S16 | RP26 | MedF | 1 | 5 | 1 | 2 | 6 |
| S16 | RP26 | MedF | 1 | 5 | 1 | 3 | 6.7 |
| S16 | RP26 | MedF | 1 | 5 | 1 | 1 | 6.1 |
| S16 | RP26 | MedF | 2 | 5 | 1 | 2 | 6.2 |
| S16 | RP26 | MedF | 2 | 5 | 1 | 3 | 5.7 |
| S16 | RP26 | MedF | 2 | 5 | 1 | 1 | 6.6 |
| S16 | RP26 | MedF | 1 | 1 | 1 | 2 | 5.4 |
| S16 | RP26 | MedF | 1 | 1 | 1 | 3 | 7 |
| S16 | RP26 | MedF | 1 | 1 | 1 | 1 | 5.5 |
| S16 | RP26 | MedF | 2 | 1 | 1 | 2 | 6 |
| S16 | RP26 | MedF | 2 | 1 | 1 | 3 | 5.8 |
| S16 | RP26 | MedF | 2 | 1 | 1 | 1 | 6.5 |
| S17 | RP2 | DxT | 1 | 1 | 1 | 2 | 6.7 |
| S17 | RP2 | DxT | 1 | 1 | 1 | 1 | 6.4 |
| S17 | RP2 | DxT | 1 | 1 | 1 | 3 | 6.4 |
| S17 | RP2 | DxT | 2 | 1 | 1 | 2 | 6.3 |
| S17 | RP2 | DxT | 2 | 1 | 1 | 1 | 6.5 |
| S17 | RP2 | DxT | 2 | 1 | 1 | 3 | 6.6 |
| S17 | RP2 | Kashi | 1 | 1 | 1 | 2 | 6.8 |
| S17 | RP2 | Kashi | 1 | 1 | 1 | 1 | 6.2 |
| S17 | RP2 | Kashi | 1 | 1 | 1 | 3 | 6.6 |
| S17 | RP2 | Kashi | 1 | 2 | 1 | 2 | 7 |
| S17 | RP2 | Kashi | 1 | 2 | 1 | 1 | 6.6 |
| S17 | RP2 | Kashi | 1 | 2 | 1 | 3 | 6.9 |
| S17 | RP2 | Kashi | 2 | 1 | 1 | 2 | 7.5 |
| S17 | RP2 | Kashi | 2 | 1 | 1 | 1 | 7.8 |
| S17 | RP2 | Kashi | 2 | 1 | 1 | 3 | 7.4 |
| S17 | RP2 | Kashi | 2 | 2 | 1 | 2 | 6.3 |
| S17 | RP2 | Kashi | 2 | 2 | 1 | 1 | 7.3 |
| S17 | RP2 | Kashi | 2 | 2 | 1 | 3 | 7.1 |
| S17 | RP2 | DxT | 2 | 2 | 1 | 2 | 6.4 |
| S17 | RP2 | DxT | 2 | 2 | 1 | 1 | 6.8 |
| S17 | RP2 | DxT | 2 | 2 | 1 | 3 | 6.4 |
| S17 | RP2 | DxT | 1 | 2 | 1 | 2 | 6.6 |
| S17 | RP2 | DxT | 1 | 2 | 1 | 1 | 7 |
| S17 | RP2 | DxT | 1 | 2 | 1 | 3 | 6.2 |
| S17 | RP2 | DxT | 2 | 1 | 2 | 2 | 6.6 |
| S17 | RP2 | DxT | 2 | 1 | 2 | 1 | 6.4 |
| S17 | RP2 | DxT | 2 | 1 | 2 | 3 | 6.9 |
| S17 | RP2 | DxT | 1 | 3 | 1 | 2 | 6.3 |
| S17 | RP2 | DxT | 1 | 3 | 1 | 1 | 6.6 |
| S17 | RP2 | DxT | 1 | 3 | 1 | 3 | 6.7 |
| S17 | RP2 | DxT | 1 | 3 | 2 | 2 | 6.1 |
| S17 | RP2 | DxT | 1 | 3 | 2 | 1 | 6.6 |
| S17 | RP2 | DxT | 1 | 3 | 2 | 3 | 6.2 |
| S17 | RP2 | DxT | 2 | 3 | 1 | 2 | 6.2 |
| S17 | RP2 | DxT | 2 | 3 | 1 | 1 | 7 |
| S17 | RP2 | DxT | 2 | 3 | 1 | 3 | 6.4 |
| S17 | RP2 | DxT | 2 | 3 | 2 | 2 | 6.8 |
| S17 | RP2 | DxT | 2 | 3 | 2 | 1 | 6.4 |
| S17 | RP2 | DxT | 2 | 3 | 2 | 3 | 6.9 |
| S17 | RP2 | Kashi | 1 | 3 | 1 | 2 | 6.6 |
| S17 | RP2 | Kashi | 1 | 3 | 1 | 1 | 6.2 |
| S17 | RP2 | Kashi | 1 | 3 | 1 | 3 | 6.5 |
| S17 | RP2 | Kashi | 1 | 4 | 1 | 2 | 6.6 |
| S17 | RP2 | Kashi | 1 | 4 | 1 | 1 | 6.9 |
| S17 | RP2 | Kashi | 1 | 4 | 1 | 3 | 7 |
| S17 | RP2 | Kashi | 1 | 5 | 1 | 2 | 6.8 |
| S17 | RP2 | Kashi | 1 | 5 | 1 | 1 | 7.1 |
| S17 | RP2 | Kashi | 1 | 5 | 1 | 3 | 7.2 |
| S17 | RP2 | Kashi | 2 | 3 | 1 | 2 | 6.4 |
| S17 | RP2 | Kashi | 2 | 3 | 1 | 1 | 7 |
| S17 | RP2 | Kashi | 2 | 3 | 1 | 3 | 7 |
| S17 | RP2 | Kashi | 2 | 4 | 1 | 2 | 3.5 |
| S17 | RP2 | Kashi | 2 | 4 | 1 | 1 | 6.5 |
| S17 | RP2 | Kashi | 2 | 4 | 1 | 3 | 6.3 |
| S17 | RP2 | Kashi | 2 | 5 | 1 | 2 | 7 |
| S17 | RP2 | Kashi | 2 | 5 | 1 | 1 | 7.1 |
| S17 | RP2 | Kashi | 2 | 5 | 1 | 3 | 7.2 |
| S17 | RP2 | DxT | 2 | 4 | 1 | 2 | 5.6 |
| S17 | RP2 | DxT | 2 | 4 | 1 | 1 | 5.7 |
| S17 | RP2 | DxT | 2 | 4 | 1 | 3 | 5.9 |
| S17 | RP2 | DxT | 2 | 4 | 2 | 2 | 7 |
| S17 | RP2 | DxT | 2 | 4 | 2 | 1 | 7 |
| S17 | RP2 | DxT | 2 | 4 | 2 | 3 | 6.9 |
| S17 | RP2 | DxT | 1 | 4 | 2 | 2 | 6.4 |
| S17 | RP2 | DxT | 1 | 4 | 2 | 1 | 6.9 |
| S17 | RP2 | DxT | 1 | 4 | 2 | 3 | 6.3 |
| S17 | RP2 | DxT | 1 | 5 | 1 | 2 | 6.3 |
| S17 | RP2 | DxT | 1 | 5 | 1 | 1 | 6.2 |
| S17 | RP2 | DxT | 1 | 5 | 1 | 3 | 6.2 |
| S17 | RP2 | DxT | 1 | 5 | 2 | 2 | 7 |
| S17 | RP2 | DxT | 1 | 5 | 2 | 1 | 6.7 |
| S17 | RP2 | DxT | 1 | 5 | 2 | 3 | 7 |
| S17 | RP2 | DxT | 2 | 5 | 1 | 2 | 6.2 |
| S17 | RP2 | DxT | 2 | 5 | 1 | 1 | 6.9 |
| S17 | RP2 | DxT | 2 | 5 | 1 | 3 | 6.7 |
| S17 | RP2 | DxT | 2 | 2 | 2 | 2 | 6.9 |
| S17 | RP2 | DxT | 2 | 2 | 2 | 1 | 6.6 |
| S17 | RP2 | DxT | 2 | 2 | 2 | 3 | 6.4 |
| S17 | RP2 | DxT | 1 | 2 | 2 | 2 | 6.8 |
| S17 | RP2 | DxT | 1 | 2 | 2 | 1 | 6.2 |
| S17 | RP2 | DxT | 1 | 2 | 2 | 3 | 6.9 |
| S17 | RP2 | DxT | 2 | 5 | 2 | 2 | 6.7 |
| S17 | RP2 | DxT | 2 | 5 | 2 | 1 | 6.2 |
| S17 | RP2 | DxT | 2 | 5 | 2 | 3 | 6.3 |
| S17 | RP2 | DxT | 1 | 4 | 1 | 2 | 6.7 |
| S17 | RP2 | DxT | 1 | 4 | 1 | 1 | 6.6 |
| S17 | RP2 | DxT | 1 | 4 | 1 | 3 | 6.2 |
| S17 | RP2 | DxT | 1 | 1 | 2 | 2 | 7.3 |
| S17 | RP2 | DxT | 1 | 1 | 2 | 1 | 6.5 |
| S17 | RP2 | DxT | 1 | 1 | 2 | 3 | 6.7 |
| S17 | RP2 | MedF | 2 | 3 | 1 | 2 | 7.4 |
| S17 | RP2 | MedF | 2 | 3 | 1 | 1 | 6.6 |
| S17 | RP2 | MedF | 2 | 3 | 1 | 3 | 7.3 |
| S17 | RP2 | MedF | 1 | 3 | 1 | 2 | 7.5 |
| S17 | RP2 | MedF | 1 | 3 | 1 | 1 | 7 |
| S17 | RP2 | MedF | 1 | 3 | 1 | 3 | 7 |
| S17 | RP2 | MedF | 2 | 2 | 1 | 2 | 7.3 |
| S17 | RP2 | MedF | 2 | 2 | 1 | 1 | 6.7 |
| S17 | RP2 | MedF | 2 | 2 | 1 | 3 | 6.5 |
| S17 | RP2 | MedF | 1 | 2 | 1 | 2 | 7 |
| S17 | RP2 | MedF | 1 | 2 | 1 | 1 | 6.7 |
| S17 | RP2 | MedF | 1 | 2 | 1 | 3 | 7.4 |
| S17 | RP2 | MedF | 1 | 4 | 1 | 2 | 6.9 |
| S17 | RP2 | MedF | 1 | 4 | 1 | 1 | 6.7 |
| S17 | RP2 | MedF | 1 | 4 | 1 | 3 | 7.1 |
| S17 | RP2 | MedF | 2 | 4 | 1 | 2 | 8 |
| S17 | RP2 | MedF | 2 | 4 | 1 | 1 | 7 |
| S17 | RP2 | MedF | 2 | 4 | 1 | 3 | 7.1 |
| S17 | RP2 | MedF | 1 | 5 | 1 | 2 | 7 |
| S17 | RP2 | MedF | 1 | 5 | 1 | 1 | 7.2 |
| S17 | RP2 | MedF | 1 | 5 | 1 | 3 | 6.6 |
| S17 | RP2 | MedF | 2 | 5 | 1 | 2 | 6.6 |
| S17 | RP2 | MedF | 2 | 5 | 1 | 1 | 6.1 |
| S17 | RP2 | MedF | 2 | 5 | 1 | 3 | 7.2 |
| S17 | RP2 | MedF | 1 | 1 | 1 | 2 | 6 |
| S17 | RP2 | MedF | 1 | 1 | 1 | 1 | 6.4 |
| S17 | RP2 | MedF | 1 | 1 | 1 | 3 | 6.1 |
| S17 | RP2 | MedF | 2 | 1 | 1 | 2 | 6.5 |
| S17 | RP2 | MedF | 2 | 1 | 1 | 1 | 5.3 |
| S17 | RP2 | MedF | 2 | 1 | 1 | 3 | 6.5 |
| S18 | RP13 | DxT | 1 | 1 | 1 | 3 | 4.9 |
| S18 | RP13 | DxT | 1 | 1 | 1 | 1 | 6.9 |
| S18 | RP13 | DxT | 1 | 1 | 1 | 2 | 6.9 |
| S18 | RP13 | DxT | 2 | 1 | 1 | 3 | 4.4 |
| S18 | RP13 | DxT | 2 | 1 | 1 | 1 | 7.5 |
| S18 | RP13 | DxT | 2 | 1 | 1 | 2 | 7.6 |
| S18 | RP13 | Kashi | 1 | 1 | 1 | 3 | 6.8 |
| S18 | RP13 | Kashi | 1 | 1 | 1 | 1 | 7.3 |
| S18 | RP13 | Kashi | 1 | 1 | 1 | 2 | 6 |
| S18 | RP13 | Kashi | 1 | 2 | 1 | 3 | 6.9 |
| S18 | RP13 | Kashi | 1 | 2 | 1 | 1 | 7.1 |
| S18 | RP13 | Kashi | 1 | 2 | 1 | 2 | 7.7 |
| S18 | RP13 | Kashi | 2 | 1 | 1 | 3 | 4.8 |
| S18 | RP13 | Kashi | 2 | 1 | 1 | 1 | 6.9 |
| S18 | RP13 | Kashi | 2 | 1 | 1 | 2 | 7 |
| S18 | RP13 | Kashi | 2 | 2 | 1 | 3 | 7.6 |
| S18 | RP13 | Kashi | 2 | 2 | 1 | 1 | 7.4 |
| S18 | RP13 | Kashi | 2 | 2 | 1 | 2 | 7.5 |
| S18 | RP13 | DxT | 2 | 2 | 1 | 3 | 6.6 |
| S18 | RP13 | DxT | 2 | 2 | 1 | 1 | 6.8 |
| S18 | RP13 | DxT | 2 | 2 | 1 | 2 | 9.3 |
| S18 | RP13 | DxT | 1 | 2 | 1 | 3 | 6.9 |
| S18 | RP13 | DxT | 1 | 2 | 1 | 1 | 7.1 |
| S18 | RP13 | DxT | 1 | 2 | 1 | 2 | 7.8 |
| S18 | RP13 | DxT | 2 | 1 | 2 | 3 | 7 |
| S18 | RP13 | DxT | 2 | 1 | 2 | 1 | 6.9 |
| S18 | RP13 | DxT | 2 | 1 | 2 | 2 | 6.8 |
| S18 | RP13 | DxT | 1 | 3 | 1 | 3 | 7.3 |
| S18 | RP13 | DxT | 1 | 3 | 1 | 1 | 6.7 |
| S18 | RP13 | DxT | 1 | 3 | 1 | 2 | 7.3 |
| S18 | RP13 | DxT | 1 | 3 | 2 | 3 | 7 |
| S18 | RP13 | DxT | 1 | 3 | 2 | 1 | 6.7 |
| S18 | RP13 | DxT | 1 | 3 | 2 | 2 | 7.2 |
| S18 | RP13 | DxT | 2 | 3 | 1 | 3 | 7.6 |
| S18 | RP13 | DxT | 2 | 3 | 1 | 1 | 7.3 |
| S18 | RP13 | DxT | 2 | 3 | 1 | 2 | 7.1 |
| S18 | RP13 | DxT | 2 | 3 | 2 | 3 | 7.2 |
| S18 | RP13 | DxT | 2 | 3 | 2 | 1 | 7.3 |
| S18 | RP13 | DxT | 2 | 3 | 2 | 2 | 7.4 |
| S18 | RP13 | Kashi | 1 | 3 | 1 | 3 | 6.6 |
| S18 | RP13 | Kashi | 1 | 3 | 1 | 1 | 7 |
| S18 | RP13 | Kashi | 1 | 3 | 1 | 2 | 7 |
| S18 | RP13 | Kashi | 1 | 4 | 1 | 3 | 6.5 |
| S18 | RP13 | Kashi | 1 | 4 | 1 | 1 | 6.9 |
| S18 | RP13 | Kashi | 1 | 4 | 1 | 2 | 7.2 |
| S18 | RP13 | Kashi | 1 | 5 | 1 | 3 | 6.1 |
| S18 | RP13 | Kashi | 1 | 5 | 1 | 1 | 7 |
| S18 | RP13 | Kashi | 1 | 5 | 1 | 2 | 6.9 |
| S18 | RP13 | Kashi | 2 | 3 | 1 | 3 | 2.3 |
| S18 | RP13 | Kashi | 2 | 3 | 1 | 1 | 6.1 |
| S18 | RP13 | Kashi | 2 | 3 | 1 | 2 | 6.6 |
| S18 | RP13 | Kashi | 2 | 4 | 1 | 3 | 6.7 |
| S18 | RP13 | Kashi | 2 | 4 | 1 | 1 | 7.5 |
| S18 | RP13 | Kashi | 2 | 4 | 1 | 2 | 6 |
| S18 | RP13 | Kashi | 2 | 5 | 1 | 3 | 7.1 |
| S18 | RP13 | Kashi | 2 | 5 | 1 | 1 | 7.2 |
| S18 | RP13 | Kashi | 2 | 5 | 1 | 2 | 7.4 |
| S18 | RP13 | DxT | 2 | 4 | 1 | 3 | 6.3 |
| S18 | RP13 | DxT | 2 | 4 | 1 | 1 | 6.7 |
| S18 | RP13 | DxT | 2 | 4 | 1 | 2 | 6.2 |
| S18 | RP13 | DxT | 2 | 4 | 2 | 3 | 7.4 |
| S18 | RP13 | DxT | 2 | 4 | 2 | 1 | 7 |
| S18 | RP13 | DxT | 2 | 4 | 2 | 2 | 6.9 |
| S18 | RP13 | DxT | 1 | 4 | 2 | 3 | 6.9 |
| S18 | RP13 | DxT | 1 | 4 | 2 | 1 | 6 |
| S18 | RP13 | DxT | 1 | 4 | 2 | 2 | 6.8 |
| S18 | RP13 | DxT | 1 | 5 | 1 | 3 | 7 |
| S18 | RP13 | DxT | 1 | 5 | 1 | 1 | 7.7 |
| S18 | RP13 | DxT | 1 | 5 | 1 | 2 | 7 |
| S18 | RP13 | DxT | 1 | 5 | 2 | 3 | 6.7 |
| S18 | RP13 | DxT | 1 | 5 | 2 | 1 | 6.4 |
| S18 | RP13 | DxT | 1 | 5 | 2 | 2 | 6.8 |
| S18 | RP13 | DxT | 2 | 5 | 1 | 3 | 6.5 |
| S18 | RP13 | DxT | 2 | 5 | 1 | 1 | 7.3 |
| S18 | RP13 | DxT | 2 | 5 | 1 | 2 | 6.9 |
| S18 | RP13 | DxT | 2 | 2 | 2 | 3 | 6.9 |
| S18 | RP13 | DxT | 2 | 2 | 2 | 1 | 6.8 |
| S18 | RP13 | DxT | 2 | 2 | 2 | 2 | 6.9 |
| S18 | RP13 | DxT | 1 | 2 | 2 | 3 | 7 |
| S18 | RP13 | DxT | 1 | 2 | 2 | 1 | 6.7 |
| S18 | RP13 | DxT | 1 | 2 | 2 | 2 | 6.3 |
| S18 | RP13 | DxT | 2 | 5 | 2 | 3 | 6.5 |
| S18 | RP13 | DxT | 2 | 5 | 2 | 1 | 6.4 |
| S18 | RP13 | DxT | 2 | 5 | 2 | 2 | 6.6 |
| S18 | RP13 | DxT | 1 | 4 | 1 | 3 | 6.2 |
| S18 | RP13 | DxT | 1 | 4 | 1 | 1 | 6.9 |
| S18 | RP13 | DxT | 1 | 4 | 1 | 2 | 7.2 |
| S18 | RP13 | DxT | 1 | 1 | 2 | 3 | 6.3 |
| S18 | RP13 | DxT | 1 | 1 | 2 | 1 | 6.5 |
| S18 | RP13 | DxT | 1 | 1 | 2 | 2 | 7 |
| S18 | RP13 | MedF | 2 | 3 | 1 | 3 | 6.6 |
| S18 | RP13 | MedF | 2 | 3 | 1 | 1 | 6.9 |
| S18 | RP13 | MedF | 2 | 3 | 1 | 2 | 7.4 |
| S18 | RP13 | MedF | 1 | 3 | 1 | 3 | 6.1 |
| S18 | RP13 | MedF | 1 | 3 | 1 | 1 | 8.4 |
| S18 | RP13 | MedF | 1 | 3 | 1 | 2 | 6.7 |
| S18 | RP13 | MedF | 2 | 2 | 1 | 3 | 7.2 |
| S18 | RP13 | MedF | 2 | 2 | 1 | 1 | 7.3 |
| S18 | RP13 | MedF | 2 | 2 | 1 | 2 | 7.3 |
| S18 | RP13 | MedF | 1 | 2 | 1 | 3 | 6.4 |
| S18 | RP13 | MedF | 1 | 2 | 1 | 1 | 7.7 |
| S18 | RP13 | MedF | 1 | 2 | 1 | 2 | 8.3 |
| S18 | RP13 | MedF | 1 | 4 | 1 | 3 | 7.7 |
| S18 | RP13 | MedF | 1 | 4 | 1 | 1 | 7.1 |
| S18 | RP13 | MedF | 1 | 4 | 1 | 2 | 9 |
| S18 | RP13 | MedF | 2 | 4 | 1 | 3 | 6.5 |
| S18 | RP13 | MedF | 2 | 4 | 1 | 1 | 7.6 |
| S18 | RP13 | MedF | 2 | 4 | 1 | 2 | 7.4 |
| S18 | RP13 | MedF | 1 | 5 | 1 | 3 | 6.9 |
| S18 | RP13 | MedF | 1 | 5 | 1 | 1 | 7.4 |
| S18 | RP13 | MedF | 1 | 5 | 1 | 2 | 6.5 |
| S18 | RP13 | MedF | 2 | 5 | 1 | 3 | 6.2 |
| S18 | RP13 | MedF | 2 | 5 | 1 | 1 | 7.2 |
| S18 | RP13 | MedF | 2 | 5 | 1 | 2 | 7.2 |
| S18 | RP13 | MedF | 1 | 1 | 1 | 3 | 7.9 |
| S18 | RP13 | MedF | 1 | 1 | 1 | 1 | 6.2 |
| S18 | RP13 | MedF | 1 | 1 | 1 | 2 | 5.9 |
| S18 | RP13 | MedF | 2 | 1 | 1 | 3 | 5.6 |
| S18 | RP13 | MedF | 2 | 1 | 1 | 1 | 5.2 |
| S18 | RP13 | MedF | 2 | 1 | 1 | 2 | 6 |
| S19 | RP7 | DxT | 1 | 1 | 1 | 1 | 7.5 |
| S19 | RP7 | DxT | 1 | 1 | 1 | 3 | 6.9 |
| S19 | RP7 | DxT | 1 | 1 | 1 | 2 | 7.8 |
| S19 | RP7 | DxT | 2 | 1 | 1 | 1 | 7.1 |
| S19 | RP7 | DxT | 2 | 1 | 1 | 3 | 7.2 |
| S19 | RP7 | DxT | 2 | 1 | 1 | 2 | 7.3 |
| S19 | RP7 | Kashi | 1 | 1 | 1 | 2 | 6.9 |
| S19 | RP7 | Kashi | 1 | 1 | 1 | 3 | 7.2 |
| S19 | RP7 | Kashi | 1 | 1 | 1 | 1 | 7.3 |
| S19 | RP7 | Kashi | 1 | 2 | 1 | 2 | 7.1 |
| S19 | RP7 | Kashi | 1 | 2 | 1 | 1 | 7.8 |
| S19 | RP7 | Kashi | 2 | 1 | 1 | 2 | 8.8 |
| S19 | RP7 | Kashi | 2 | 1 | 1 | 3 | 7.6 |
| S19 | RP7 | Kashi | 2 | 1 | 1 | 1 | 8.6 |
| S19 | RP7 | Kashi | 2 | 2 | 1 | 2 | 7.7 |
| S19 | RP7 | Kashi | 2 | 2 | 1 | 3 | 7.4 |
| S19 | RP7 | Kashi | 2 | 2 | 1 | 1 | 7.7 |
| S19 | RP7 | DxT | 2 | 2 | 1 | 1 | 7.3 |
| S19 | RP7 | DxT | 2 | 2 | 1 | 3 | 7.4 |
| S19 | RP7 | DxT | 2 | 2 | 1 | 2 | 7.3 |
| S19 | RP7 | DxT | 1 | 2 | 1 | 1 | 7 |
| S19 | RP7 | DxT | 1 | 2 | 1 | 3 | 7.4 |
| S19 | RP7 | DxT | 1 | 2 | 1 | 2 | 7.4 |
| S19 | RP7 | DxT | 2 | 1 | 2 | 1 | 7.1 |
| S19 | RP7 | DxT | 2 | 1 | 2 | 3 | 7.8 |
| S19 | RP7 | DxT | 2 | 1 | 2 | 2 | 8 |
| S19 | RP7 | DxT | 1 | 3 | 1 | 1 | 7.3 |
| S19 | RP7 | DxT | 1 | 3 | 1 | 3 | 7.5 |
| S19 | RP7 | DxT | 1 | 3 | 1 | 2 | 7.3 |
| S19 | RP7 | DxT | 1 | 3 | 2 | 1 | 7.3 |
| S19 | RP7 | DxT | 1 | 3 | 2 | 3 | 7.6 |
| S19 | RP7 | DxT | 1 | 3 | 2 | 2 | 7.4 |
| S19 | RP7 | DxT | 2 | 3 | 1 | 1 | 7.7 |
| S19 | RP7 | DxT | 2 | 3 | 1 | 3 | 7.5 |
| S19 | RP7 | DxT | 2 | 3 | 1 | 2 | 7.8 |
| S19 | RP7 | DxT | 2 | 3 | 2 | 1 | 7.8 |
| S19 | RP7 | DxT | 2 | 3 | 2 | 3 | 7.8 |
| S19 | RP7 | DxT | 2 | 3 | 2 | 2 | 7.2 |
| S19 | RP7 | Kashi | 1 | 3 | 1 | 2 | 6.9 |
| S19 | RP7 | Kashi | 1 | 3 | 1 | 3 | 7.6 |
| S19 | RP7 | Kashi | 1 | 3 | 1 | 1 | 7.6 |
| S19 | RP7 | Kashi | 1 | 4 | 1 | 2 | 7.8 |
| S19 | RP7 | Kashi | 1 | 4 | 1 | 3 | 7.4 |
| S19 | RP7 | Kashi | 1 | 4 | 1 | 1 | 7.6 |
| S19 | RP7 | Kashi | 1 | 5 | 1 | 2 | 7.4 |
| S19 | RP7 | Kashi | 1 | 5 | 1 | 3 | 7.9 |
| S19 | RP7 | Kashi | 1 | 5 | 1 | 1 | 7.8 |
| S19 | RP7 | Kashi | 2 | 3 | 1 | 2 | 7.4 |
| S19 | RP7 | Kashi | 2 | 3 | 1 | 3 | 3.6 |
| S19 | RP7 | Kashi | 2 | 3 | 1 | 1 | 7.6 |
| S19 | RP7 | Kashi | 2 | 4 | 1 | 2 | 6.8 |
| S19 | RP7 | Kashi | 2 | 4 | 1 | 3 | 6.4 |
| S19 | RP7 | Kashi | 2 | 4 | 1 | 1 | 7.3 |
| S19 | RP7 | Kashi | 2 | 5 | 1 | 2 | 7.9 |
| S19 | RP7 | Kashi | 2 | 5 | 1 | 3 | 7.6 |
| S19 | RP7 | Kashi | 2 | 5 | 1 | 1 | 6.3 |
| S19 | RP7 | DxT | 2 | 4 | 1 | 1 | 6.4 |
| S19 | RP7 | DxT | 2 | 4 | 1 | 3 | 8 |
| S19 | RP7 | DxT | 2 | 4 | 1 | 2 | 7.4 |
| S19 | RP7 | DxT | 2 | 4 | 2 | 1 | 7.2 |
| S19 | RP7 | DxT | 2 | 4 | 2 | 3 | 7.4 |
| S19 | RP7 | DxT | 2 | 4 | 2 | 2 | 7.3 |
| S19 | RP7 | DxT | 1 | 4 | 2 | 1 | 7.7 |
| S19 | RP7 | DxT | 1 | 4 | 2 | 3 | 7 |
| S19 | RP7 | DxT | 1 | 4 | 2 | 2 | 8 |
| S19 | RP7 | DxT | 1 | 5 | 1 | 1 | 6.7 |
| S19 | RP7 | DxT | 1 | 5 | 1 | 3 | 6.5 |
| S19 | RP7 | DxT | 1 | 5 | 1 | 2 | 6.8 |
| S19 | RP7 | DxT | 1 | 5 | 2 | 1 | 7.4 |
| S19 | RP7 | DxT | 1 | 5 | 2 | 3 | 7.5 |
| S19 | RP7 | DxT | 1 | 5 | 2 | 2 | 8 |
| S19 | RP7 | DxT | 2 | 5 | 1 | 1 | 7 |
| S19 | RP7 | DxT | 2 | 5 | 1 | 3 | 7 |
| S19 | RP7 | DxT | 2 | 5 | 1 | 2 | 6.9 |
| S19 | RP7 | DxT | 2 | 2 | 2 | 1 | 7.8 |
| S19 | RP7 | DxT | 2 | 2 | 2 | 3 | 7.1 |
| S19 | RP7 | DxT | 2 | 2 | 2 | 2 | 7.4 |
| S19 | RP7 | DxT | 1 | 2 | 2 | 1 | 7.9 |
| S19 | RP7 | DxT | 1 | 2 | 2 | 3 | 7.6 |
| S19 | RP7 | DxT | 1 | 2 | 2 | 2 | 8.4 |
| S19 | RP7 | DxT | 2 | 5 | 2 | 1 | 7.3 |
| S19 | RP7 | DxT | 2 | 5 | 2 | 3 | 6.6 |
| S19 | RP7 | DxT | 2 | 5 | 2 | 2 | 7.2 |
| S19 | RP7 | DxT | 1 | 4 | 1 | 1 | 7.3 |
| S19 | RP7 | DxT | 1 | 4 | 1 | 3 | 7.1 |
| S19 | RP7 | DxT | 1 | 4 | 1 | 2 | 7.2 |
| S19 | RP7 | DxT | 1 | 1 | 2 | 1 | 7.9 |
| S19 | RP7 | DxT | 1 | 1 | 2 | 3 | 7.6 |
| S19 | RP7 | DxT | 1 | 1 | 2 | 2 | 7.5 |
| S19 | RP7 | Kashi | 1 | 2 | 1 | 3 | 7.1 |
| S19 | RP7 | MedF | 2 | 3 | 1 | 1 | 7.8 |
| S19 | RP7 | MedF | 2 | 3 | 1 | 3 | 7.1 |
| S19 | RP7 | MedF | 2 | 3 | 1 | 2 | 7.7 |
| S19 | RP7 | MedF | 1 | 3 | 1 | 1 | 7.7 |
| S19 | RP7 | MedF | 1 | 3 | 1 | 3 | 0.4 |
| S19 | RP7 | MedF | 1 | 3 | 1 | 2 | 8.1 |
| S19 | RP7 | MedF | 2 | 2 | 1 | 1 | 8.1 |
| S19 | RP7 | MedF | 2 | 2 | 1 | 3 | 7.3 |
| S19 | RP7 | MedF | 2 | 2 | 1 | 2 | 7.6 |
| S19 | RP7 | MedF | 1 | 2 | 1 | 1 | 8.2 |
| S19 | RP7 | MedF | 1 | 2 | 1 | 3 | 7.5 |
| S19 | RP7 | MedF | 1 | 2 | 1 | 2 | 7.7 |
| S19 | RP7 | MedF | 1 | 4 | 1 | 1 | 7.8 |
| S19 | RP7 | MedF | 1 | 4 | 1 | 3 | 7.7 |
| S19 | RP7 | MedF | 1 | 4 | 1 | 2 | 8 |
| S19 | RP7 | MedF | 2 | 4 | 1 | 1 | 8.1 |
| S19 | RP7 | MedF | 2 | 4 | 1 | 3 | 7.8 |
| S19 | RP7 | MedF | 2 | 4 | 1 | 2 | 7.8 |
| S19 | RP7 | MedF | 1 | 5 | 1 | 1 | 7.4 |
| S19 | RP7 | MedF | 1 | 5 | 1 | 3 | 7.8 |
| S19 | RP7 | MedF | 1 | 5 | 1 | 2 | 7.6 |
| S19 | RP7 | MedF | 2 | 5 | 1 | 1 | 7.9 |
| S19 | RP7 | MedF | 2 | 5 | 1 | 3 | 7.3 |
| S19 | RP7 | MedF | 2 | 5 | 1 | 2 | 7.3 |
| S19 | RP7 | MedF | 1 | 1 | 1 | 1 | 6.6 |
| S19 | RP7 | MedF | 1 | 1 | 1 | 3 | 7.4 |
| S19 | RP7 | MedF | 1 | 1 | 1 | 2 | 6.7 |
| S19 | RP7 | MedF | 2 | 1 | 1 | 1 | 7.9 |
| S19 | RP7 | MedF | 2 | 1 | 1 | 3 | 6.6 |
| S19 | RP7 | MedF | 2 | 1 | 1 | 2 | 7.2 |
| S2 | RP16 | DxT | 1 | 1 | 1 | 3 | 0.8 |
| S2 | RP16 | DxT | 1 | 1 | 1 | 1 | 0.9 |
| S2 | RP16 | DxT | 1 | 1 | 1 | 2 | 0.9 |
| S2 | RP16 | DxT | 2 | 1 | 1 | 3 | 1 |
| S2 | RP16 | DxT | 2 | 1 | 1 | 1 | 0.8 |
| S2 | RP16 | DxT | 2 | 1 | 1 | 2 | 0.9 |
| S2 | RP16 | Kashi | 1 | 1 | 1 | 2 | 0.8 |
| S2 | RP16 | Kashi | 1 | 1 | 1 | 3 | 1 |
| S2 | RP16 | Kashi | 1 | 1 | 1 | 1 | 1.9 |
| S2 | RP16 | Kashi | 1 | 2 | 1 | 2 | 1.2 |
| S2 | RP16 | Kashi | 1 | 2 | 1 | 3 | 1.1 |
| S2 | RP16 | Kashi | 1 | 2 | 1 | 1 | 1.2 |
| S2 | RP16 | Kashi | 2 | 1 | 1 | 2 | 1.4 |
| S2 | RP16 | Kashi | 2 | 1 | 1 | 3 | 1.2 |
| S2 | RP16 | Kashi | 2 | 1 | 1 | 1 | 1.5 |
| S2 | RP16 | Kashi | 2 | 2 | 1 | 2 | 1.1 |
| S2 | RP16 | Kashi | 2 | 2 | 1 | 3 | 1 |
| S2 | RP16 | Kashi | 2 | 2 | 1 | 1 | 1.4 |
| S2 | RP16 | DxT | 2 | 2 | 1 | 3 | 1 |
| S2 | RP16 | DxT | 2 | 2 | 1 | 1 | 1 |
| S2 | RP16 | DxT | 2 | 2 | 1 | 2 | 1 |
| S2 | RP16 | DxT | 1 | 2 | 1 | 3 | 0.9 |
| S2 | RP16 | DxT | 1 | 2 | 1 | 1 | 0.9 |
| S2 | RP16 | DxT | 1 | 2 | 1 | 2 | 0.9 |
| S2 | RP16 | DxT | 2 | 1 | 2 | 3 | 1.1 |
| S2 | RP16 | DxT | 2 | 1 | 2 | 1 | 1.1 |
| S2 | RP16 | DxT | 2 | 1 | 2 | 2 | 1.1 |
| S2 | RP16 | DxT | 1 | 3 | 1 | 3 | 1 |
| S2 | RP16 | DxT | 1 | 3 | 1 | 1 | 0.9 |
| S2 | RP16 | DxT | 1 | 3 | 1 | 2 | 0.9 |
| S2 | RP16 | DxT | 1 | 3 | 2 | 3 | 1.1 |
| S2 | RP16 | DxT | 1 | 3 | 2 | 1 | 1 |
| S2 | RP16 | DxT | 1 | 3 | 2 | 2 | 1 |
| S2 | RP16 | DxT | 2 | 3 | 1 | 3 | 1.2 |
| S2 | RP16 | DxT | 2 | 3 | 1 | 1 | 1.1 |
| S2 | RP16 | DxT | 2 | 3 | 1 | 2 | 1 |
| S2 | RP16 | DxT | 2 | 3 | 2 | 3 | 1.2 |
| S2 | RP16 | DxT | 2 | 3 | 2 | 1 | 1.2 |
| S2 | RP16 | DxT | 2 | 3 | 2 | 2 | 1.3 |
| S2 | RP16 | Kashi | 1 | 3 | 1 | 2 | 0.9 |
| S2 | RP16 | Kashi | 1 | 3 | 1 | 3 | 0.9 |
| S2 | RP16 | Kashi | 1 | 3 | 1 | 1 | 0.8 |
| S2 | RP16 | Kashi | 1 | 4 | 1 | 2 | 1.2 |
| S2 | RP16 | Kashi | 1 | 4 | 1 | 3 | 1.1 |
| S2 | RP16 | Kashi | 1 | 4 | 1 | 1 | 1 |
| S2 | RP16 | Kashi | 1 | 5 | 1 | 2 | 1 |
| S2 | RP16 | Kashi | 1 | 5 | 1 | 3 | 1.1 |
| S2 | RP16 | Kashi | 1 | 5 | 1 | 1 | 1 |
| S2 | RP16 | Kashi | 2 | 3 | 1 | 2 | 1 |
| S2 | RP16 | Kashi | 2 | 3 | 1 | 3 | 1 |
| S2 | RP16 | Kashi | 2 | 3 | 1 | 1 | 1 |
| S2 | RP16 | Kashi | 2 | 4 | 1 | 2 | 0.9 |
| S2 | RP16 | Kashi | 2 | 4 | 1 | 3 | 0.8 |
| S2 | RP16 | Kashi | 2 | 4 | 1 | 1 | 1 |
| S2 | RP16 | Kashi | 2 | 5 | 1 | 2 | 0.9 |
| S2 | RP16 | Kashi | 2 | 5 | 1 | 3 | 1.3 |
| S2 | RP16 | Kashi | 2 | 5 | 1 | 1 | 1.2 |
| S2 | RP16 | DxT | 2 | 4 | 1 | 3 | 1 |
| S2 | RP16 | DxT | 2 | 4 | 1 | 1 | 0.9 |
| S2 | RP16 | DxT | 2 | 4 | 1 | 2 | 1 |
| S2 | RP16 | DxT | 2 | 4 | 2 | 3 | 1.1 |
| S2 | RP16 | DxT | 2 | 4 | 2 | 1 | 1 |
| S2 | RP16 | DxT | 2 | 4 | 2 | 2 | 1.1 |
| S2 | RP16 | DxT | 1 | 4 | 2 | 3 | 1.1 |
| S2 | RP16 | DxT | 1 | 4 | 2 | 1 | 1.2 |
| S2 | RP16 | DxT | 1 | 4 | 2 | 2 | 1.2 |
| S2 | RP16 | DxT | 1 | 5 | 1 | 3 | 0.9 |
| S2 | RP16 | DxT | 1 | 5 | 1 | 1 | 0.8 |
| S2 | RP16 | DxT | 1 | 5 | 1 | 2 | 0.9 |
| S2 | RP16 | DxT | 1 | 5 | 2 | 3 | 1 |
| S2 | RP16 | DxT | 1 | 5 | 2 | 1 | 1.1 |
| S2 | RP16 | DxT | 1 | 5 | 2 | 2 | 1 |
| S2 | RP16 | DxT | 2 | 5 | 1 | 3 | 1.1 |
| S2 | RP16 | DxT | 2 | 5 | 1 | 1 | 0.8 |
| S2 | RP16 | DxT | 2 | 5 | 1 | 2 | 1 |
| S2 | RP16 | DxT | 2 | 2 | 2 | 3 | 1.1 |
| S2 | RP16 | DxT | 2 | 2 | 2 | 1 | 1.1 |
| S2 | RP16 | DxT | 2 | 2 | 2 | 2 | 1 |
| S2 | RP16 | DxT | 1 | 2 | 2 | 3 | 1.1 |
| S2 | RP16 | DxT | 1 | 2 | 2 | 1 | 1.1 |
| S2 | RP16 | DxT | 1 | 2 | 2 | 2 | 1.1 |
| S2 | RP16 | DxT | 2 | 5 | 2 | 3 | 1 |
| S2 | RP16 | DxT | 2 | 5 | 2 | 1 | 1 |
| S2 | RP16 | DxT | 2 | 5 | 2 | 2 | 1 |
| S2 | RP16 | DxT | 1 | 4 | 1 | 3 | 1 |
| S2 | RP16 | DxT | 1 | 4 | 1 | 1 | 0.9 |
| S2 | RP16 | DxT | 1 | 4 | 1 | 2 | 1 |
| S2 | RP16 | DxT | 1 | 1 | 2 | 3 | 1.1 |
| S2 | RP16 | DxT | 1 | 1 | 2 | 1 | 0.9 |
| S2 | RP16 | DxT | 1 | 1 | 2 | 2 | 1.1 |
| S2 | RP16 | MedF | 2 | 3 | 1 | 3 | 1.1 |
| S2 | RP16 | MedF | 2 | 3 | 1 | 1 | 1.2 |
| S2 | RP16 | MedF | 2 | 3 | 1 | 2 | 1.1 |
| S2 | RP16 | MedF | 1 | 3 | 1 | 3 | 1.2 |
| S2 | RP16 | MedF | 1 | 3 | 1 | 1 | 0.9 |
| S2 | RP16 | MedF | 1 | 3 | 1 | 2 | 1 |
| S2 | RP16 | MedF | 2 | 2 | 1 | 3 | 1 |
| S2 | RP16 | MedF | 2 | 2 | 1 | 1 | 1.2 |
| S2 | RP16 | MedF | 2 | 2 | 1 | 2 | 1.2 |
| S2 | RP16 | MedF | 1 | 2 | 1 | 3 | 1.1 |
| S2 | RP16 | MedF | 1 | 2 | 1 | 1 | 1 |
| S2 | RP16 | MedF | 1 | 2 | 1 | 2 | 1.1 |
| S2 | RP16 | MedF | 1 | 4 | 1 | 3 | 1.2 |
| S2 | RP16 | MedF | 1 | 4 | 1 | 1 | 1 |
| S2 | RP16 | MedF | 1 | 4 | 1 | 2 | 1.1 |
| S2 | RP16 | MedF | 2 | 4 | 1 | 3 | 1.3 |
| S2 | RP16 | MedF | 2 | 4 | 1 | 1 | 1.3 |
| S2 | RP16 | MedF | 2 | 4 | 1 | 2 | 1.3 |
| S2 | RP16 | MedF | 1 | 5 | 1 | 3 | 1.1 |
| S2 | RP16 | MedF | 1 | 5 | 1 | 1 | 1.1 |
| S2 | RP16 | MedF | 1 | 5 | 1 | 2 | 1.2 |
| S2 | RP16 | MedF | 2 | 5 | 1 | 3 | 0.9 |
| S2 | RP16 | MedF | 2 | 5 | 1 | 1 | 1 |
| S2 | RP16 | MedF | 2 | 5 | 1 | 2 | 0.9 |
| S2 | RP16 | MedF | 1 | 1 | 1 | 3 | 0.8 |
| S2 | RP16 | MedF | 1 | 1 | 1 | 1 | 0.8 |
| S2 | RP16 | MedF | 1 | 1 | 1 | 2 | 0.9 |
| S2 | RP16 | MedF | 2 | 1 | 1 | 3 | 1 |
| S2 | RP16 | MedF | 2 | 1 | 1 | 1 | 1 |
| S2 | RP16 | MedF | 2 | 1 | 1 | 2 | 1.4 |
| S20 | RP11 | DxT | 1 | 1 | 1 | 2 | 7.8 |
| S20 | RP11 | DxT | 1 | 1 | 1 | 1 | 7.4 |
| S20 | RP11 | DxT | 1 | 1 | 1 | 3 | 7.6 |
| S20 | RP11 | DxT | 2 | 1 | 1 | 2 | 7.7 |
| S20 | RP11 | DxT | 2 | 1 | 1 | 1 | 8 |
| S20 | RP11 | DxT | 2 | 1 | 1 | 3 | 7.3 |
| S20 | RP11 | Kashi | 1 | 1 | 1 | 2 | 7.9 |
| S20 | RP11 | Kashi | 1 | 1 | 1 | 1 | 7.8 |
| S20 | RP11 | Kashi | 1 | 1 | 1 | 3 | 6.9 |
| S20 | RP11 | Kashi | 1 | 2 | 1 | 2 | 7.7 |
| S20 | RP11 | Kashi | 1 | 2 | 1 | 1 | 9 |
| S20 | RP11 | Kashi | 1 | 2 | 1 | 3 | 7.5 |
| S20 | RP11 | Kashi | 2 | 1 | 1 | 2 | 8.3 |
| S20 | RP11 | Kashi | 2 | 1 | 1 | 1 | 9 |
| S20 | RP11 | Kashi | 2 | 1 | 1 | 3 | 8.3 |
| S20 | RP11 | Kashi | 2 | 2 | 1 | 2 | 8 |
| S20 | RP11 | Kashi | 2 | 2 | 1 | 1 | 7.8 |
| S20 | RP11 | Kashi | 2 | 2 | 1 | 3 | 7.8 |
| S20 | RP11 | DxT | 2 | 2 | 1 | 2 | 7.9 |
| S20 | RP11 | DxT | 2 | 2 | 1 | 1 | 7.5 |
| S20 | RP11 | DxT | 2 | 2 | 1 | 3 | 7.7 |
| S20 | RP11 | DxT | 1 | 2 | 1 | 2 | 7 |
| S20 | RP11 | DxT | 1 | 2 | 1 | 1 | 7.2 |
| S20 | RP11 | DxT | 1 | 2 | 1 | 3 | 8 |
| S20 | RP11 | DxT | 2 | 1 | 2 | 2 | 7.9 |
| S20 | RP11 | DxT | 2 | 1 | 2 | 1 | 8 |
| S20 | RP11 | DxT | 2 | 1 | 2 | 3 | 7.7 |
| S20 | RP11 | DxT | 1 | 3 | 1 | 2 | 7.5 |
| S20 | RP11 | DxT | 1 | 3 | 1 | 1 | 7.5 |
| S20 | RP11 | DxT | 1 | 3 | 1 | 3 | 7.9 |
| S20 | RP11 | DxT | 1 | 3 | 2 | 2 | 7.9 |
| S20 | RP11 | DxT | 1 | 3 | 2 | 1 | 7.8 |
| S20 | RP11 | DxT | 1 | 3 | 2 | 3 | 7.1 |
| S20 | RP11 | DxT | 2 | 3 | 1 | 2 | 7.6 |
| S20 | RP11 | DxT | 2 | 3 | 1 | 1 | 7.7 |
| S20 | RP11 | DxT | 2 | 3 | 1 | 3 | 7.7 |
| S20 | RP11 | DxT | 2 | 3 | 2 | 2 | 8.2 |
| S20 | RP11 | DxT | 2 | 3 | 2 | 1 | 7.7 |
| S20 | RP11 | DxT | 2 | 3 | 2 | 3 | 7.3 |
| S20 | RP11 | Kashi | 1 | 3 | 1 | 2 | 7.3 |
| S20 | RP11 | Kashi | 1 | 3 | 1 | 1 | 7.3 |
| S20 | RP11 | Kashi | 1 | 3 | 1 | 3 | 7.9 |
| S20 | RP11 | Kashi | 1 | 4 | 1 | 2 | 7.3 |
| S20 | RP11 | Kashi | 1 | 4 | 1 | 1 | 8.1 |
| S20 | RP11 | Kashi | 1 | 4 | 1 | 3 | 7.8 |
| S20 | RP11 | Kashi | 1 | 5 | 1 | 2 | 7.2 |
| S20 | RP11 | Kashi | 1 | 5 | 1 | 1 | 8.4 |
| S20 | RP11 | Kashi | 1 | 5 | 1 | 3 | 7.9 |
| S20 | RP11 | Kashi | 2 | 3 | 1 | 2 | 7.3 |
| S20 | RP11 | Kashi | 2 | 3 | 1 | 1 | 6.5 |
| S20 | RP11 | Kashi | 2 | 3 | 1 | 3 | 7.1 |
| S20 | RP11 | Kashi | 2 | 4 | 1 | 2 | 7.6 |
| S20 | RP11 | Kashi | 2 | 4 | 1 | 1 | 7.3 |
| S20 | RP11 | Kashi | 2 | 4 | 1 | 3 | 6.5 |
| S20 | RP11 | Kashi | 2 | 5 | 1 | 2 | 7.8 |
| S20 | RP11 | Kashi | 2 | 5 | 1 | 1 | 7.1 |
| S20 | RP11 | Kashi | 2 | 5 | 1 | 3 | 7.9 |
| S20 | RP11 | DxT | 2 | 4 | 1 | 2 | 7 |
| S20 | RP11 | DxT | 2 | 4 | 1 | 1 | 6.8 |
| S20 | RP11 | DxT | 2 | 4 | 1 | 3 | 6.8 |
| S20 | RP11 | DxT | 2 | 4 | 2 | 2 | 6.4 |
| S20 | RP11 | DxT | 2 | 4 | 2 | 1 | 8.1 |
| S20 | RP11 | DxT | 2 | 4 | 2 | 3 | 8.3 |
| S20 | RP11 | DxT | 1 | 4 | 2 | 2 | 8.3 |
| S20 | RP11 | DxT | 1 | 4 | 2 | 1 | 8 |
| S20 | RP11 | DxT | 1 | 4 | 2 | 3 | 7.4 |
| S20 | RP11 | DxT | 1 | 5 | 1 | 2 | 7.3 |
| S20 | RP11 | DxT | 1 | 5 | 1 | 1 | 7.1 |
| S20 | RP11 | DxT | 1 | 5 | 1 | 3 | 7.5 |
| S20 | RP11 | DxT | 1 | 5 | 2 | 2 | 7.9 |
| S20 | RP11 | DxT | 1 | 5 | 2 | 1 | 7.6 |
| S20 | RP11 | DxT | 1 | 5 | 2 | 3 | 7.4 |
| S20 | RP11 | DxT | 2 | 5 | 1 | 2 | 7.7 |
| S20 | RP11 | DxT | 2 | 5 | 1 | 1 | 7.8 |
| S20 | RP11 | DxT | 2 | 5 | 1 | 3 | 8.5 |
| S20 | RP11 | DxT | 2 | 2 | 2 | 2 | 8 |
| S20 | RP11 | DxT | 2 | 2 | 2 | 1 | 7.5 |
| S20 | RP11 | DxT | 2 | 2 | 2 | 3 | 7.5 |
| S20 | RP11 | DxT | 1 | 2 | 2 | 2 | 7.4 |
| S20 | RP11 | DxT | 1 | 2 | 2 | 1 | 7.8 |
| S20 | RP11 | DxT | 1 | 2 | 2 | 3 | 7.8 |
| S20 | RP11 | DxT | 2 | 5 | 2 | 2 | 7.3 |
| S20 | RP11 | DxT | 2 | 5 | 2 | 1 | 7.1 |
| S20 | RP11 | DxT | 2 | 5 | 2 | 3 | 7.2 |
| S20 | RP11 | DxT | 1 | 4 | 1 | 2 | 8 |
| S20 | RP11 | DxT | 1 | 4 | 1 | 1 | 7.6 |
| S20 | RP11 | DxT | 1 | 4 | 1 | 3 | 8 |
| S20 | RP11 | DxT | 1 | 1 | 2 | 2 | 7.3 |
| S20 | RP11 | DxT | 1 | 1 | 2 | 1 | 7.4 |
| S20 | RP11 | DxT | 1 | 1 | 2 | 3 | 7.5 |
| S20 | RP11 | MedF | 2 | 3 | 1 | 2 | 7.7 |
| S20 | RP11 | MedF | 2 | 3 | 1 | 1 | 8.6 |
| S20 | RP11 | MedF | 2 | 3 | 1 | 3 | 8.3 |
| S20 | RP11 | MedF | 1 | 3 | 1 | 2 | 8.6 |
| S20 | RP11 | MedF | 1 | 3 | 1 | 1 | 8.1 |
| S20 | RP11 | MedF | 1 | 3 | 1 | 3 | 8.1 |
| S20 | RP11 | MedF | 2 | 2 | 1 | 2 | 7.8 |
| S20 | RP11 | MedF | 2 | 2 | 1 | 1 | 7.4 |
| S20 | RP11 | MedF | 2 | 2 | 1 | 3 | 7 |
| S20 | RP11 | MedF | 1 | 2 | 1 | 2 | 8.2 |
| S20 | RP11 | MedF | 1 | 2 | 1 | 1 | 8.3 |
| S20 | RP11 | MedF | 1 | 2 | 1 | 3 | 7.6 |
| S20 | RP11 | MedF | 1 | 4 | 1 | 2 | 7.5 |
| S20 | RP11 | MedF | 1 | 4 | 1 | 1 | 7.9 |
| S20 | RP11 | MedF | 1 | 4 | 1 | 3 | 7.9 |
| S20 | RP11 | MedF | 2 | 4 | 1 | 2 | 8.6 |
| S20 | RP11 | MedF | 2 | 4 | 1 | 1 | 8.3 |
| S20 | RP11 | MedF | 2 | 4 | 1 | 3 | 7.6 |
| S20 | RP11 | MedF | 1 | 5 | 1 | 2 | 7.6 |
| S20 | RP11 | MedF | 1 | 5 | 1 | 1 | 7.7 |
| S20 | RP11 | MedF | 1 | 5 | 1 | 3 | 7.8 |
| S20 | RP11 | MedF | 2 | 5 | 1 | 2 | 8.1 |
| S20 | RP11 | MedF | 2 | 5 | 1 | 1 | 6.9 |
| S20 | RP11 | MedF | 2 | 5 | 1 | 3 | 7.3 |
| S20 | RP11 | MedF | 1 | 1 | 1 | 2 | 7.1 |
| S20 | RP11 | MedF | 1 | 1 | 1 | 1 | 6.7 |
| S20 | RP11 | MedF | 1 | 1 | 1 | 3 | 6.8 |
| S20 | RP11 | MedF | 2 | 1 | 1 | 2 | 7.6 |
| S20 | RP11 | MedF | 2 | 1 | 1 | 1 | 7.6 |
| S20 | RP11 | MedF | 2 | 1 | 1 | 3 | 6.7 |
| S21 | RP10 | DxT | 1 | 1 | 1 | 2 | 7.6 |
| S21 | RP10 | DxT | 1 | 1 | 1 | 1 | 8.1 |
| S21 | RP10 | DxT | 1 | 1 | 1 | 3 | 7.9 |
| S21 | RP10 | DxT | 2 | 1 | 1 | 2 | 7.6 |
| S21 | RP10 | DxT | 2 | 1 | 1 | 1 | 7.6 |
| S21 | RP10 | DxT | 2 | 1 | 1 | 3 | 7.4 |
| S21 | RP10 | Kashi | 1 | 1 | 1 | 2 | 7.5 |
| S21 | RP10 | Kashi | 1 | 1 | 1 | 1 | 8 |
| S21 | RP10 | Kashi | 1 | 1 | 1 | 3 | 8.2 |
| S21 | RP10 | Kashi | 1 | 2 | 1 | 2 | 8.3 |
| S21 | RP10 | Kashi | 1 | 2 | 1 | 1 | 8.6 |
| S21 | RP10 | Kashi | 1 | 2 | 1 | 3 | 8.3 |
| S21 | RP10 | Kashi | 2 | 1 | 1 | 2 | 8.9 |
| S21 | RP10 | Kashi | 2 | 1 | 1 | 1 | 9.3 |
| S21 | RP10 | Kashi | 2 | 1 | 1 | 3 | 8.8 |
| S21 | RP10 | Kashi | 2 | 2 | 1 | 2 | 7.7 |
| S21 | RP10 | Kashi | 2 | 2 | 1 | 1 | 8 |
| S21 | RP10 | Kashi | 2 | 2 | 1 | 3 | 7.5 |
| S21 | RP10 | DxT | 2 | 2 | 1 | 2 | 7.9 |
| S21 | RP10 | DxT | 2 | 2 | 1 | 1 | 7.8 |
| S21 | RP10 | DxT | 2 | 2 | 1 | 3 | 8 |
| S21 | RP10 | DxT | 1 | 2 | 1 | 2 | 7.7 |
| S21 | RP10 | DxT | 1 | 2 | 1 | 1 | 7.9 |
| S21 | RP10 | DxT | 1 | 2 | 1 | 3 | 7.1 |
| S21 | RP10 | DxT | 2 | 1 | 2 | 2 | 8.1 |
| S21 | RP10 | DxT | 2 | 1 | 2 | 1 | 7.8 |
| S21 | RP10 | DxT | 2 | 1 | 2 | 3 | 7.7 |
| S21 | RP10 | DxT | 1 | 3 | 1 | 2 | 8.1 |
| S21 | RP10 | DxT | 1 | 3 | 1 | 1 | 8 |
| S21 | RP10 | DxT | 1 | 3 | 1 | 3 | 7.5 |
| S21 | RP10 | DxT | 1 | 3 | 2 | 2 | 7.8 |
| S21 | RP10 | DxT | 1 | 3 | 2 | 1 | 7.8 |
| S21 | RP10 | DxT | 1 | 3 | 2 | 3 | 7.9 |
| S21 | RP10 | DxT | 2 | 3 | 1 | 2 | 6.5 |
| S21 | RP10 | DxT | 2 | 3 | 1 | 1 | 8.1 |
| S21 | RP10 | DxT | 2 | 3 | 1 | 3 | 8.5 |
| S21 | RP10 | DxT | 2 | 3 | 2 | 2 | 8.7 |
| S21 | RP10 | DxT | 2 | 3 | 2 | 1 | 7.9 |
| S21 | RP10 | DxT | 2 | 3 | 2 | 3 | 7.9 |
| S21 | RP10 | Kashi | 1 | 3 | 1 | 2 | 7.5 |
| S21 | RP10 | Kashi | 1 | 3 | 1 | 1 | 8.1 |
| S21 | RP10 | Kashi | 1 | 3 | 1 | 3 | 8.6 |
| S21 | RP10 | Kashi | 1 | 4 | 1 | 2 | 8.7 |
| S21 | RP10 | Kashi | 1 | 4 | 1 | 1 | 8.5 |
| S21 | RP10 | Kashi | 1 | 4 | 1 | 3 | 8.3 |
| S21 | RP10 | Kashi | 1 | 5 | 1 | 2 | 8.5 |
| S21 | RP10 | Kashi | 1 | 5 | 1 | 1 | 8.9 |
| S21 | RP10 | Kashi | 1 | 5 | 1 | 3 | 7.9 |
| S21 | RP10 | Kashi | 2 | 3 | 1 | 2 | 8.1 |
| S21 | RP10 | Kashi | 2 | 3 | 1 | 1 | 7.5 |
| S21 | RP10 | Kashi | 2 | 3 | 1 | 3 | 1.9 |
| S21 | RP10 | Kashi | 2 | 4 | 1 | 2 | 6.1 |
| S21 | RP10 | Kashi | 2 | 4 | 1 | 3 | 7.5 |
| S21 | RP10 | Kashi | 2 | 5 | 1 | 2 | 8.1 |
| S21 | RP10 | Kashi | 2 | 5 | 1 | 1 | 8.1 |
| S21 | RP10 | Kashi | 2 | 5 | 1 | 3 | 8.2 |
| S21 | RP10 | DxT | 2 | 4 | 1 | 2 | 7.6 |
| S21 | RP10 | DxT | 2 | 4 | 1 | 1 | 7.8 |
| S21 | RP10 | DxT | 2 | 4 | 1 | 3 | 7.4 |
| S21 | RP10 | DxT | 2 | 4 | 2 | 2 | 7.5 |
| S21 | RP10 | DxT | 2 | 4 | 2 | 1 | 8.1 |
| S21 | RP10 | DxT | 2 | 4 | 2 | 3 | 7.4 |
| S21 | RP10 | DxT | 1 | 4 | 2 | 2 | 8.1 |
| S21 | RP10 | DxT | 1 | 4 | 2 | 1 | 8.1 |
| S21 | RP10 | DxT | 1 | 4 | 2 | 3 | 8.6 |
| S21 | RP10 | DxT | 1 | 5 | 1 | 2 | 7.5 |
| S21 | RP10 | DxT | 1 | 5 | 1 | 1 | 7.4 |
| S21 | RP10 | DxT | 1 | 5 | 1 | 3 | 7.4 |
| S21 | RP10 | DxT | 1 | 5 | 2 | 2 | 8 |
| S21 | RP10 | DxT | 1 | 5 | 2 | 1 | 8 |
| S21 | RP10 | DxT | 1 | 5 | 2 | 3 | 8 |
| S21 | RP10 | DxT | 2 | 5 | 1 | 2 | 7.6 |
| S21 | RP10 | DxT | 2 | 5 | 1 | 1 | 8.2 |
| S21 | RP10 | DxT | 2 | 5 | 1 | 3 | 7.4 |
| S21 | RP10 | DxT | 2 | 2 | 2 | 2 | 8.4 |
| S21 | RP10 | DxT | 2 | 2 | 2 | 1 | 7.9 |
| S21 | RP10 | DxT | 2 | 2 | 2 | 3 | 7.6 |
| S21 | RP10 | DxT | 1 | 2 | 2 | 2 | 8.5 |
| S21 | RP10 | DxT | 1 | 2 | 2 | 1 | 7.9 |
| S21 | RP10 | DxT | 1 | 2 | 2 | 3 | 8.2 |
| S21 | RP10 | DxT | 2 | 5 | 2 | 2 | 7.5 |
| S21 | RP10 | DxT | 2 | 5 | 2 | 1 | 7.7 |
| S21 | RP10 | DxT | 2 | 5 | 2 | 3 | 7.2 |
| S21 | RP10 | DxT | 1 | 4 | 1 | 2 | 8.1 |
| S21 | RP10 | DxT | 1 | 4 | 1 | 1 | 7.7 |
| S21 | RP10 | DxT | 1 | 4 | 1 | 3 | 8.1 |
| S21 | RP10 | DxT | 1 | 1 | 2 | 2 | 8.2 |
| S21 | RP10 | DxT | 1 | 1 | 2 | 1 | 8.3 |
| S21 | RP10 | DxT | 1 | 1 | 2 | 3 | 8.2 |
| S21 | RP10 | Kashi | 2 | 4 | 1 | 1 | 9.2 |
| S21 | RP10 | MedF | 2 | 3 | 1 | 2 | 8.9 |
| S21 | RP10 | MedF | 2 | 3 | 1 | 1 | 8.7 |
| S21 | RP10 | MedF | 2 | 3 | 1 | 3 | 8.6 |
| S21 | RP10 | MedF | 1 | 3 | 1 | 2 | 8.4 |
| S21 | RP10 | MedF | 1 | 3 | 1 | 1 | 8.2 |
| S21 | RP10 | MedF | 1 | 3 | 1 | 3 | 8.3 |
| S21 | RP10 | MedF | 2 | 2 | 1 | 2 | 8.9 |
| S21 | RP10 | MedF | 2 | 2 | 1 | 1 | 8.2 |
| S21 | RP10 | MedF | 2 | 2 | 1 | 3 | 8.3 |
| S21 | RP10 | MedF | 1 | 2 | 1 | 2 | 9 |
| S21 | RP10 | MedF | 1 | 2 | 1 | 1 | 8.1 |
| S21 | RP10 | MedF | 1 | 2 | 1 | 3 | 8.2 |
| S21 | RP10 | MedF | 1 | 4 | 1 | 2 | 8.5 |
| S21 | RP10 | MedF | 1 | 4 | 1 | 1 | 8.1 |
| S21 | RP10 | MedF | 1 | 4 | 1 | 3 | 8.1 |
| S21 | RP10 | MedF | 2 | 4 | 1 | 2 | 8.6 |
| S21 | RP10 | MedF | 2 | 4 | 1 | 1 | 7.7 |
| S21 | RP10 | MedF | 2 | 4 | 1 | 3 | 8.4 |
| S21 | RP10 | MedF | 1 | 5 | 1 | 2 | 8 |
| S21 | RP10 | MedF | 1 | 5 | 1 | 1 | 8.8 |
| S21 | RP10 | MedF | 1 | 5 | 1 | 3 | 8.1 |
| S21 | RP10 | MedF | 2 | 5 | 1 | 2 | 8.4 |
| S21 | RP10 | MedF | 2 | 5 | 1 | 1 | 8.2 |
| S21 | RP10 | MedF | 2 | 5 | 1 | 3 | 7.9 |
| S21 | RP10 | MedF | 1 | 1 | 1 | 2 | 7.6 |
| S21 | RP10 | MedF | 1 | 1 | 1 | 1 | 7.5 |
| S21 | RP10 | MedF | 1 | 1 | 1 | 3 | 7.1 |
| S21 | RP10 | MedF | 2 | 1 | 1 | 2 | 7.9 |
| S21 | RP10 | MedF | 2 | 1 | 1 | 1 | 7.5 |
| S21 | RP10 | MedF | 2 | 1 | 1 | 3 | 7.9 |
| S22 | RP12 | DxT | 1 | 1 | 1 | 2 | 7.9 |
| S22 | RP12 | DxT | 1 | 1 | 1 | 3 | 10.5 |
| S22 | RP12 | DxT | 2 | 1 | 1 | 2 | 8.4 |
| S22 | RP12 | DxT | 2 | 1 | 1 | 1 | 8.5 |
| S22 | RP12 | DxT | 2 | 1 | 1 | 3 | 10.3 |
| S22 | RP12 | Kashi | 1 | 1 | 1 | 3 | 8.3 |
| S22 | RP12 | Kashi | 1 | 1 | 1 | 1 | 8.5 |
| S22 | RP12 | Kashi | 1 | 1 | 1 | 2 | 8.8 |
| S22 | RP12 | Kashi | 1 | 2 | 1 | 3 | 7.8 |
| S22 | RP12 | Kashi | 1 | 2 | 1 | 1 | 8.1 |
| S22 | RP12 | Kashi | 1 | 2 | 1 | 2 | 9.1 |
| S22 | RP12 | Kashi | 2 | 1 | 1 | 1 | 8.7 |
| S22 | RP12 | Kashi | 2 | 1 | 1 | 2 | 9.1 |
| S22 | RP12 | Kashi | 2 | 2 | 1 | 3 | 8.1 |
| S22 | RP12 | Kashi | 2 | 2 | 1 | 1 | 8.7 |
| S22 | RP12 | Kashi | 2 | 2 | 1 | 2 | 8.5 |
| S22 | RP12 | DxT | 2 | 2 | 1 | 2 | 7.8 |
| S22 | RP12 | DxT | 2 | 2 | 1 | 1 | 8.6 |
| S22 | RP12 | DxT | 2 | 2 | 1 | 3 | 8.2 |
| S22 | RP12 | DxT | 1 | 2 | 1 | 2 | 7.9 |
| S22 | RP12 | DxT | 1 | 2 | 1 | 1 | 8 |
| S22 | RP12 | DxT | 1 | 2 | 1 | 3 | 7.4 |
| S22 | RP12 | DxT | 2 | 1 | 2 | 2 | 8.5 |
| S22 | RP12 | DxT | 2 | 1 | 2 | 1 | 8.5 |
| S22 | RP12 | DxT | 2 | 1 | 2 | 3 | 8.4 |
| S22 | RP12 | DxT | 1 | 3 | 1 | 2 | 8 |
| S22 | RP12 | DxT | 1 | 3 | 1 | 1 | 8.2 |
| S22 | RP12 | DxT | 1 | 3 | 1 | 3 | 8.1 |
| S22 | RP12 | DxT | 1 | 3 | 2 | 2 | 7.9 |
| S22 | RP12 | DxT | 1 | 3 | 2 | 1 | 8.3 |
| S22 | RP12 | DxT | 1 | 3 | 2 | 3 | 7.7 |
| S22 | RP12 | DxT | 2 | 3 | 1 | 2 | 8.4 |
| S22 | RP12 | DxT | 2 | 3 | 1 | 1 | 9.3 |
| S22 | RP12 | DxT | 2 | 3 | 1 | 3 | 10.7 |
| S22 | RP12 | DxT | 2 | 3 | 2 | 2 | 7.5 |
| S22 | RP12 | DxT | 2 | 3 | 2 | 1 | 8.3 |
| S22 | RP12 | DxT | 2 | 3 | 2 | 3 | 9.9 |
| S22 | RP12 | Kashi | 1 | 3 | 1 | 3 | 7.7 |
| S22 | RP12 | Kashi | 1 | 3 | 1 | 1 | 8 |
| S22 | RP12 | Kashi | 1 | 3 | 1 | 2 | 8.4 |
| S22 | RP12 | Kashi | 1 | 4 | 1 | 3 | 8.2 |
| S22 | RP12 | Kashi | 1 | 4 | 1 | 1 | 8.4 |
| S22 | RP12 | Kashi | 1 | 4 | 1 | 2 | 8.9 |
| S22 | RP12 | Kashi | 1 | 5 | 1 | 3 | 9.3 |
| S22 | RP12 | Kashi | 1 | 5 | 1 | 1 | 8.4 |
| S22 | RP12 | Kashi | 1 | 5 | 1 | 2 | 8.6 |
| S22 | RP12 | Kashi | 2 | 3 | 1 | 3 | 4.7 |
| S22 | RP12 | Kashi | 2 | 3 | 1 | 1 | 8 |
| S22 | RP12 | Kashi | 2 | 3 | 1 | 2 | 7.8 |
| S22 | RP12 | Kashi | 2 | 4 | 1 | 3 | 7.8 |
| S22 | RP12 | Kashi | 2 | 4 | 1 | 1 | 8.5 |
| S22 | RP12 | Kashi | 2 | 4 | 1 | 2 | 6.5 |
| S22 | RP12 | Kashi | 2 | 5 | 1 | 3 | 8.5 |
| S22 | RP12 | Kashi | 2 | 5 | 1 | 1 | 8.8 |
| S22 | RP12 | Kashi | 2 | 5 | 1 | 2 | 8.5 |
| S22 | RP12 | DxT | 2 | 4 | 1 | 2 | 7.9 |
| S22 | RP12 | DxT | 2 | 4 | 1 | 1 | 8 |
| S22 | RP12 | DxT | 2 | 4 | 1 | 3 | 7.9 |
| S22 | RP12 | DxT | 2 | 4 | 2 | 2 | 7.8 |
| S22 | RP12 | DxT | 2 | 4 | 2 | 1 | 8.4 |
| S22 | RP12 | DxT | 2 | 4 | 2 | 3 | 9.5 |
| S22 | RP12 | DxT | 1 | 4 | 2 | 2 | 7.3 |
| S22 | RP12 | DxT | 1 | 4 | 2 | 1 | 8.5 |
| S22 | RP12 | DxT | 1 | 4 | 2 | 3 | 8.2 |
| S22 | RP12 | DxT | 1 | 5 | 1 | 2 | 8.2 |
| S22 | RP12 | DxT | 1 | 5 | 1 | 1 | 8 |
| S22 | RP12 | DxT | 1 | 5 | 1 | 3 | 10.3 |
| S22 | RP12 | DxT | 1 | 5 | 2 | 2 | 8.1 |
| S22 | RP12 | DxT | 1 | 5 | 2 | 1 | 8.3 |
| S22 | RP12 | DxT | 1 | 5 | 2 | 3 |  |
| S22 | RP12 | DxT | 2 | 5 | 1 | 2 | 8.2 |
| S22 | RP12 | DxT | 2 | 5 | 1 | 1 | 8.3 |
| S22 | RP12 | DxT | 2 | 5 | 1 | 3 | 9.9 |
| S22 | RP12 | DxT | 2 | 2 | 2 | 2 | 8.2 |
| S22 | RP12 | DxT | 2 | 2 | 2 | 1 | 8.3 |
| S22 | RP12 | DxT | 2 | 2 | 2 | 3 | 8.1 |
| S22 | RP12 | DxT | 1 | 2 | 2 | 2 | 8.4 |
| S22 | RP12 | DxT | 1 | 2 | 2 | 1 | 8.3 |
| S22 | RP12 | DxT | 1 | 2 | 2 | 3 | 8.5 |
| S22 | RP12 | DxT | 2 | 5 | 2 | 2 | 7.1 |
| S22 | RP12 | DxT | 2 | 5 | 2 | 1 | 7.9 |
| S22 | RP12 | DxT | 2 | 5 | 2 | 3 | 10.4 |
| S22 | RP12 | DxT | 1 | 4 | 1 | 2 | 7.9 |
| S22 | RP12 | DxT | 1 | 4 | 1 | 1 | 8.6 |
| S22 | RP12 | DxT | 1 | 4 | 1 | 3 | 8 |
| S22 | RP12 | DxT | 1 | 1 | 2 | 2 | 8.3 |
| S22 | RP12 | DxT | 1 | 1 | 2 | 1 | 8.4 |
| S22 | RP12 | DxT | 1 | 1 | 2 | 3 | 10.2 |
| S22 | RP12 | DxT | 1 | 1 | 1 | 1 | 8.9 |
| S22 | RP12 | Kashi | 2 | 1 | 1 | 3 | 8.7 |
| S22 | RP12 | MedF | 2 | 3 | 1 | 2 | 9 |
| S22 | RP12 | MedF | 2 | 3 | 1 | 1 | 8.8 |
| S22 | RP12 | MedF | 2 | 3 | 1 | 3 | 8.9 |
| S22 | RP12 | MedF | 1 | 3 | 1 | 2 | 8.3 |
| S22 | RP12 | MedF | 1 | 3 | 1 | 1 | 8.5 |
| S22 | RP12 | MedF | 1 | 3 | 1 | 3 | 9.8 |
| S22 | RP12 | MedF | 2 | 2 | 1 | 2 | 8.3 |
| S22 | RP12 | MedF | 2 | 2 | 1 | 1 | 6.7 |
| S22 | RP12 | MedF | 2 | 2 | 1 | 3 | 8.2 |
| S22 | RP12 | MedF | 1 | 2 | 1 | 2 | 8.7 |
| S22 | RP12 | MedF | 1 | 2 | 1 | 1 | 7.9 |
| S22 | RP12 | MedF | 1 | 2 | 1 | 3 | 8.9 |
| S22 | RP12 | MedF | 1 | 4 | 1 | 2 | 8.9 |
| S22 | RP12 | MedF | 1 | 4 | 1 | 1 | 8.4 |
| S22 | RP12 | MedF | 1 | 4 | 1 | 3 | 9 |
| S22 | RP12 | MedF | 2 | 4 | 1 | 2 | 8.9 |
| S22 | RP12 | MedF | 2 | 4 | 1 | 1 | 8.9 |
| S22 | RP12 | MedF | 2 | 4 | 1 | 3 | 8.7 |
| S22 | RP12 | MedF | 1 | 5 | 1 | 2 | 8.2 |
| S22 | RP12 | MedF | 1 | 5 | 1 | 1 | 8.5 |
| S22 | RP12 | MedF | 1 | 5 | 1 | 3 | 8.6 |
| S22 | RP12 | MedF | 2 | 5 | 1 | 2 | 8.5 |
| S22 | RP12 | MedF | 2 | 5 | 1 | 1 | 8.1 |
| S22 | RP12 | MedF | 2 | 5 | 1 | 3 | 7.6 |
| S22 | RP12 | MedF | 1 | 1 | 1 | 2 | 7.8 |
| S22 | RP12 | MedF | 1 | 1 | 1 | 1 | 9 |
| S22 | RP12 | MedF | 1 | 1 | 1 | 3 | 7.2 |
| S22 | RP12 | MedF | 2 | 1 | 1 | 2 | 8.7 |
| S22 | RP12 | MedF | 2 | 1 | 1 | 1 | 6.6 |
| S22 | RP12 | MedF | 2 | 1 | 1 | 3 | 7.9 |
| S23 | RP21 | DxT | 1 | 1 | 1 | 3 | 5 |
| S23 | RP21 | DxT | 1 | 1 | 1 | 1 | 7.9 |
| S23 | RP21 | DxT | 1 | 1 | 1 | 2 | 7.9 |
| S23 | RP21 | DxT | 2 | 1 | 1 | 3 | 8.7 |
| S23 | RP21 | DxT | 2 | 1 | 1 | 1 | 8.1 |
| S23 | RP21 | DxT | 2 | 1 | 1 | 2 | 8.1 |
| S23 | RP21 | Kashi | 1 | 1 | 1 | 1 | 8.5 |
| S23 | RP21 | Kashi | 1 | 1 | 1 | 3 | 8.5 |
| S23 | RP21 | Kashi | 1 | 1 | 1 | 2 | 8.3 |
| S23 | RP21 | Kashi | 1 | 2 | 1 | 1 | 9.5 |
| S23 | RP21 | Kashi | 1 | 2 | 1 | 3 | 9.3 |
| S23 | RP21 | Kashi | 1 | 2 | 1 | 2 | 8.9 |
| S23 | RP21 | Kashi | 2 | 1 | 1 | 1 | 9.7 |
| S23 | RP21 | Kashi | 2 | 1 | 1 | 2 | 8.7 |
| S23 | RP21 | Kashi | 2 | 2 | 1 | 1 | 8.8 |
| S23 | RP21 | Kashi | 2 | 2 | 1 | 3 | 8.4 |
| S23 | RP21 | DxT | 2 | 2 | 1 | 3 | 8.7 |
| S23 | RP21 | DxT | 2 | 2 | 1 | 1 | 7.9 |
| S23 | RP21 | DxT | 2 | 2 | 1 | 2 | 8.3 |
| S23 | RP21 | DxT | 1 | 2 | 1 | 3 | 8.4 |
| S23 | RP21 | DxT | 1 | 2 | 1 | 1 | 8.9 |
| S23 | RP21 | DxT | 1 | 2 | 1 | 2 | 7.8 |
| S23 | RP21 | DxT | 2 | 1 | 2 | 3 | 8.3 |
| S23 | RP21 | DxT | 2 | 1 | 2 | 1 | 9.1 |
| S23 | RP21 | DxT | 2 | 1 | 2 | 2 | 7.7 |
| S23 | RP21 | DxT | 1 | 3 | 1 | 3 | 7.8 |
| S23 | RP21 | DxT | 1 | 3 | 1 | 1 | 8.4 |
| S23 | RP21 | DxT | 1 | 3 | 1 | 2 | 8.4 |
| S23 | RP21 | DxT | 1 | 3 | 2 | 3 | 8.3 |
| S23 | RP21 | DxT | 1 | 3 | 2 | 1 | 8.3 |
| S23 | RP21 | DxT | 1 | 3 | 2 | 2 | 8 |
| S23 | RP21 | DxT | 2 | 3 | 1 | 3 | 8.5 |
| S23 | RP21 | DxT | 2 | 3 | 1 | 1 | 9.3 |
| S23 | RP21 | DxT | 2 | 3 | 1 | 2 | 8.4 |
| S23 | RP21 | DxT | 2 | 3 | 2 | 3 | 7.7 |
| S23 | RP21 | DxT | 2 | 3 | 2 | 1 | 8.4 |
| S23 | RP21 | DxT | 2 | 3 | 2 | 2 | 8.6 |
| S23 | RP21 | Kashi | 1 | 3 | 1 | 1 | 7.9 |
| S23 | RP21 | Kashi | 1 | 3 | 1 | 3 | 8.7 |
| S23 | RP21 | Kashi | 1 | 3 | 1 | 2 | 8.5 |
| S23 | RP21 | Kashi | 1 | 4 | 1 | 1 | 9.1 |
| S23 | RP21 | Kashi | 1 | 4 | 1 | 3 | 8.2 |
| S23 | RP21 | Kashi | 1 | 4 | 1 | 2 | 8.9 |
| S23 | RP21 | Kashi | 1 | 5 | 1 | 1 | 8.3 |
| S23 | RP21 | Kashi | 1 | 5 | 1 | 3 | 8.2 |
| S23 | RP21 | Kashi | 1 | 5 | 1 | 2 | 8.5 |
| S23 | RP21 | Kashi | 2 | 3 | 1 | 1 | 8.3 |
| S23 | RP21 | Kashi | 2 | 3 | 1 | 3 | 8.4 |
| S23 | RP21 | Kashi | 2 | 3 | 1 | 2 | 8.4 |
| S23 | RP21 | Kashi | 2 | 4 | 1 | 1 | 7.9 |
| S23 | RP21 | Kashi | 2 | 4 | 1 | 3 | 7.7 |
| S23 | RP21 | Kashi | 2 | 4 | 1 | 2 | 9.1 |
| S23 | RP21 | Kashi | 2 | 5 | 1 | 1 | 8.3 |
| S23 | RP21 | Kashi | 2 | 5 | 1 | 3 | 8.5 |
| S23 | RP21 | Kashi | 2 | 5 | 1 | 2 | 8.7 |
| S23 | RP21 | DxT | 2 | 4 | 1 | 3 | 7.7 |
| S23 | RP21 | DxT | 2 | 4 | 1 | 1 | 7.9 |
| S23 | RP21 | DxT | 2 | 4 | 1 | 2 | 8.6 |
| S23 | RP21 | DxT | 2 | 4 | 2 | 3 | 7.9 |
| S23 | RP21 | DxT | 2 | 4 | 2 | 1 | 9.3 |
| S23 | RP21 | DxT | 2 | 4 | 2 | 2 | 8.4 |
| S23 | RP21 | DxT | 1 | 4 | 2 | 3 | 9.2 |
| S23 | RP21 | DxT | 1 | 4 | 2 | 1 | 7.2 |
| S23 | RP21 | DxT | 1 | 4 | 2 | 2 | 8.2 |
| S23 | RP21 | DxT | 1 | 5 | 1 | 3 | 8.1 |
| S23 | RP21 | DxT | 1 | 5 | 1 | 1 | 8.1 |
| S23 | RP21 | DxT | 1 | 5 | 1 | 2 | 7.9 |
| S23 | RP21 | DxT | 1 | 5 | 2 | 3 | 7.7 |
| S23 | RP21 | DxT | 1 | 5 | 2 | 1 | 9.3 |
| S23 | RP21 | DxT | 1 | 5 | 2 | 2 | 8.3 |
| S23 | RP21 | DxT | 2 | 5 | 1 | 3 | 8.6 |
| S23 | RP21 | DxT | 2 | 5 | 1 | 1 | 8.3 |
| S23 | RP21 | DxT | 2 | 5 | 1 | 2 | 8.6 |
| S23 | RP21 | DxT | 2 | 2 | 2 | 3 | 8.5 |
| S23 | RP21 | DxT | 2 | 2 | 2 | 1 | 9 |
| S23 | RP21 | DxT | 2 | 2 | 2 | 2 | 7.7 |
| S23 | RP21 | DxT | 1 | 2 | 2 | 3 | 8.6 |
| S23 | RP21 | DxT | 1 | 2 | 2 | 1 | 8.8 |
| S23 | RP21 | DxT | 1 | 2 | 2 | 2 | 8.4 |
| S23 | RP21 | DxT | 2 | 5 | 2 | 3 | 7.9 |
| S23 | RP21 | DxT | 2 | 5 | 2 | 1 | 8.4 |
| S23 | RP21 | DxT | 2 | 5 | 2 | 2 | 8.4 |
| S23 | RP21 | DxT | 1 | 4 | 1 | 3 | 9.9 |
| S23 | RP21 | DxT | 1 | 4 | 1 | 1 | 7.9 |
| S23 | RP21 | DxT | 1 | 4 | 1 | 2 | 8.3 |
| S23 | RP21 | DxT | 1 | 1 | 2 | 3 | 8.8 |
| S23 | RP21 | DxT | 1 | 1 | 2 | 1 | 8.3 |
| S23 | RP21 | DxT | 1 | 1 | 2 | 2 | 8.4 |
| S23 | RP21 | Kashi | 2 | 1 | 1 | 3 | 9.1 |
| S23 | RP21 | Kashi | 2 | 2 | 1 | 2 | 9.4 |
| S23 | RP21 | MedF | 2 | 3 | 1 | 3 | 8.9 |
| S23 | RP21 | MedF | 2 | 3 | 1 | 1 | 9.4 |
| S23 | RP21 | MedF | 2 | 3 | 1 | 2 | 8.8 |
| S23 | RP21 | MedF | 1 | 3 | 1 | 3 | 9 |
| S23 | RP21 | MedF | 1 | 3 | 1 | 1 | 8.9 |
| S23 | RP21 | MedF | 1 | 3 | 1 | 2 | 9 |
| S23 | RP21 | MedF | 2 | 2 | 1 | 3 | 9.7 |
| S23 | RP21 | MedF | 2 | 2 | 1 | 1 | 8 |
| S23 | RP21 | MedF | 2 | 2 | 1 | 2 | 9 |
| S23 | RP21 | MedF | 1 | 2 | 1 | 3 | 9.4 |
| S23 | RP21 | MedF | 1 | 2 | 1 | 1 | 9 |
| S23 | RP21 | MedF | 1 | 2 | 1 | 2 | 8.5 |
| S23 | RP21 | MedF | 1 | 4 | 1 | 3 | 8.7 |
| S23 | RP21 | MedF | 1 | 4 | 1 | 1 | 8.6 |
| S23 | RP21 | MedF | 1 | 4 | 1 | 2 | 9.2 |
| S23 | RP21 | MedF | 2 | 4 | 1 | 3 | 8.9 |
| S23 | RP21 | MedF | 2 | 4 | 1 | 1 | 9.8 |
| S23 | RP21 | MedF | 2 | 4 | 1 | 2 | 9.1 |
| S23 | RP21 | MedF | 1 | 5 | 1 | 3 | 8.8 |
| S23 | RP21 | MedF | 1 | 5 | 1 | 1 | 8.4 |
| S23 | RP21 | MedF | 1 | 5 | 1 | 2 | 7.8 |
| S23 | RP21 | MedF | 2 | 5 | 1 | 3 | 8.3 |
| S23 | RP21 | MedF | 2 | 5 | 1 | 1 | 8.2 |
| S23 | RP21 | MedF | 2 | 5 | 1 | 2 | 7.9 |
| S23 | RP21 | MedF | 1 | 1 | 1 | 3 | 7.9 |
| S23 | RP21 | MedF | 1 | 1 | 1 | 1 | 7.8 |
| S23 | RP21 | MedF | 1 | 1 | 1 | 2 | 7.8 |
| S23 | RP21 | MedF | 2 | 1 | 1 | 3 | 8 |
| S23 | RP21 | MedF | 2 | 1 | 1 | 1 | 8.4 |
| S23 | RP21 | MedF | 2 | 1 | 1 | 2 | 8.2 |
| S24 | RP18 | DxT | 1 | 1 | 1 | 2 | 8.8 |
| S24 | RP18 | DxT | 1 | 1 | 1 | 3 | 9.4 |
| S24 | RP18 | DxT | 1 | 1 | 1 | 1 | 8.3 |
| S24 | RP18 | DxT | 2 | 1 | 1 | 2 | 8.6 |
| S24 | RP18 | DxT | 2 | 1 | 1 | 3 | 9.2 |
| S24 | RP18 | DxT | 2 | 1 | 1 | 1 | 9.5 |
| S24 | RP18 | Kashi | 1 | 1 | 1 | 3 | 9.2 |
| S24 | RP18 | Kashi | 1 | 1 | 1 | 1 | 8.6 |
| S24 | RP18 | Kashi | 1 | 1 | 1 | 2 | 8.8 |
| S24 | RP18 | Kashi | 1 | 2 | 1 | 3 | 8.6 |
| S24 | RP18 | Kashi | 1 | 2 | 1 | 1 | 9 |
| S24 | RP18 | Kashi | 1 | 2 | 1 | 2 | 9.7 |
| S24 | RP18 | Kashi | 2 | 1 | 1 | 3 | 9.2 |
| S24 | RP18 | Kashi | 2 | 1 | 1 | 1 | 10.2 |
| S24 | RP18 | Kashi | 2 | 1 | 1 | 2 | 10.1 |
| S24 | RP18 | Kashi | 2 | 2 | 1 | 3 | 8.5 |
| S24 | RP18 | Kashi | 2 | 2 | 1 | 1 | 9.7 |
| S24 | RP18 | Kashi | 2 | 2 | 1 | 2 | 9.3 |
| S24 | RP18 | DxT | 2 | 2 | 1 | 2 | 9 |
| S24 | RP18 | DxT | 2 | 2 | 1 | 3 | 8.8 |
| S24 | RP18 | DxT | 2 | 2 | 1 | 1 | 9.1 |
| S24 | RP18 | DxT | 1 | 2 | 1 | 2 | 9.2 |
| S24 | RP18 | DxT | 1 | 2 | 1 | 3 | 9.3 |
| S24 | RP18 | DxT | 1 | 2 | 1 | 1 | 8.9 |
| S24 | RP18 | DxT | 2 | 1 | 2 | 2 | 9.5 |
| S24 | RP18 | DxT | 2 | 1 | 2 | 3 | 9.5 |
| S24 | RP18 | DxT | 2 | 1 | 2 | 1 | 9.4 |
| S24 | RP18 | DxT | 1 | 3 | 1 | 2 | 9.1 |
| S24 | RP18 | DxT | 1 | 3 | 1 | 3 | 9.1 |
| S24 | RP18 | DxT | 1 | 3 | 1 | 1 | 9.2 |
| S24 | RP18 | DxT | 1 | 3 | 2 | 2 | 8.6 |
| S24 | RP18 | DxT | 1 | 3 | 2 | 3 | 9.1 |
| S24 | RP18 | DxT | 1 | 3 | 2 | 1 | 9.6 |
| S24 | RP18 | DxT | 2 | 3 | 1 | 2 | 9 |
| S24 | RP18 | DxT | 2 | 3 | 1 | 3 | 8.5 |
| S24 | RP18 | DxT | 2 | 3 | 1 | 1 | 9.4 |
| S24 | RP18 | DxT | 2 | 3 | 2 | 2 | 9 |
| S24 | RP18 | DxT | 2 | 3 | 2 | 3 | 9.6 |
| S24 | RP18 | DxT | 2 | 3 | 2 | 1 | 8.9 |
| S24 | RP18 | Kashi | 1 | 3 | 1 | 3 | 8.4 |
| S24 | RP18 | Kashi | 1 | 3 | 1 | 1 | 8.9 |
| S24 | RP18 | Kashi | 1 | 3 | 1 | 2 | 9.2 |
| S24 | RP18 | Kashi | 1 | 4 | 1 | 3 | 9.7 |
| S24 | RP18 | Kashi | 1 | 4 | 1 | 1 | 9.3 |
| S24 | RP18 | Kashi | 1 | 4 | 1 | 2 | 9.3 |
| S24 | RP18 | Kashi | 1 | 5 | 1 | 3 | 8.5 |
| S24 | RP18 | Kashi | 1 | 5 | 1 | 1 | 9.4 |
| S24 | RP18 | Kashi | 1 | 5 | 1 | 2 | 9.3 |
| S24 | RP18 | Kashi | 2 | 3 | 1 | 3 | 7.1 |
| S24 | RP18 | Kashi | 2 | 3 | 1 | 1 | 8.9 |
| S24 | RP18 | Kashi | 2 | 3 | 1 | 2 | 8.8 |
| S24 | RP18 | Kashi | 2 | 4 | 1 | 3 | 7 |
| S24 | RP18 | Kashi | 2 | 4 | 1 | 1 | 8.8 |
| S24 | RP18 | Kashi | 2 | 4 | 1 | 2 | 9.4 |
| S24 | RP18 | Kashi | 2 | 5 | 1 | 3 | 9 |
| S24 | RP18 | Kashi | 2 | 5 | 1 | 1 | 9.8 |
| S24 | RP18 | Kashi | 2 | 5 | 1 | 2 | 9.7 |
| S24 | RP18 | DxT | 2 | 4 | 1 | 2 | 7.8 |
| S24 | RP18 | DxT | 2 | 4 | 1 | 3 | 8.7 |
| S24 | RP18 | DxT | 2 | 4 | 1 | 1 | 8.7 |
| S24 | RP18 | DxT | 2 | 4 | 2 | 2 | 8.7 |
| S24 | RP18 | DxT | 2 | 4 | 2 | 3 | 8.5 |
| S24 | RP18 | DxT | 2 | 4 | 2 | 1 | 8.9 |
| S24 | RP18 | DxT | 1 | 4 | 2 | 2 | 9.4 |
| S24 | RP18 | DxT | 1 | 4 | 2 | 3 | 9 |
| S24 | RP18 | DxT | 1 | 4 | 2 | 1 | 9.3 |
| S24 | RP18 | DxT | 1 | 5 | 1 | 2 | 8.8 |
| S24 | RP18 | DxT | 1 | 5 | 1 | 3 | 9.1 |
| S24 | RP18 | DxT | 1 | 5 | 1 | 1 | 9.1 |
| S24 | RP18 | DxT | 1 | 5 | 2 | 2 | 9.1 |
| S24 | RP18 | DxT | 1 | 5 | 2 | 3 | 8.7 |
| S24 | RP18 | DxT | 1 | 5 | 2 | 1 | 8.9 |
| S24 | RP18 | DxT | 2 | 5 | 1 | 2 | 9.2 |
| S24 | RP18 | DxT | 2 | 5 | 1 | 3 | 8.8 |
| S24 | RP18 | DxT | 2 | 5 | 1 | 1 | 9 |
| S24 | RP18 | DxT | 2 | 2 | 2 | 2 | 9.1 |
| S24 | RP18 | DxT | 2 | 2 | 2 | 3 | 9.7 |
| S24 | RP18 | DxT | 2 | 2 | 2 | 1 | 9.4 |
| S24 | RP18 | DxT | 1 | 2 | 2 | 2 | 9.3 |
| S24 | RP18 | DxT | 1 | 2 | 2 | 3 | 9.1 |
| S24 | RP18 | DxT | 1 | 2 | 2 | 1 | 9.9 |
| S24 | RP18 | DxT | 2 | 5 | 2 | 2 | 8.2 |
| S24 | RP18 | DxT | 2 | 5 | 2 | 3 | 9.1 |
| S24 | RP18 | DxT | 2 | 5 | 2 | 1 | 9.6 |
| S24 | RP18 | DxT | 1 | 4 | 1 | 2 | 9.7 |
| S24 | RP18 | DxT | 1 | 4 | 1 | 3 | 9.1 |
| S24 | RP18 | DxT | 1 | 4 | 1 | 1 | 9.4 |
| S24 | RP18 | DxT | 1 | 1 | 2 | 2 | 9.3 |
| S24 | RP18 | DxT | 1 | 1 | 2 | 3 | 9.5 |
| S24 | RP18 | DxT | 1 | 1 | 2 | 1 | 8.5 |
| S24 | RP18 | MedF | 2 | 3 | 1 | 2 | 10.2 |
| S24 | RP18 | MedF | 2 | 3 | 1 | 3 | 10.3 |
| S24 | RP18 | MedF | 2 | 3 | 1 | 1 | 8.4 |
| S24 | RP18 | MedF | 1 | 3 | 1 | 2 | 9.3 |
| S24 | RP18 | MedF | 1 | 3 | 1 | 3 | 8.5 |
| S24 | RP18 | MedF | 1 | 3 | 1 | 1 | 10.2 |
| S24 | RP18 | MedF | 2 | 2 | 1 | 2 | 9.9 |
| S24 | RP18 | MedF | 2 | 2 | 1 | 3 | 9 |
| S24 | RP18 | MedF | 2 | 2 | 1 | 1 | 8.9 |
| S24 | RP18 | MedF | 1 | 2 | 1 | 2 | 9.4 |
| S24 | RP18 | MedF | 1 | 2 | 1 | 3 | 8.7 |
| S24 | RP18 | MedF | 1 | 2 | 1 | 1 | 9.9 |
| S24 | RP18 | MedF | 1 | 4 | 1 | 2 | 9.4 |
| S24 | RP18 | MedF | 1 | 4 | 1 | 3 | 10.2 |
| S24 | RP18 | MedF | 1 | 4 | 1 | 1 | 9.2 |
| S24 | RP18 | MedF | 2 | 4 | 1 | 2 | 10.7 |
| S24 | RP18 | MedF | 2 | 4 | 1 | 3 | 10 |
| S24 | RP18 | MedF | 2 | 4 | 1 | 1 | 9.6 |
| S24 | RP18 | MedF | 1 | 5 | 1 | 2 | 9.3 |
| S24 | RP18 | MedF | 1 | 5 | 1 | 3 | 10.1 |
| S24 | RP18 | MedF | 1 | 5 | 1 | 1 | 8.7 |
| S24 | RP18 | MedF | 2 | 5 | 1 | 2 | 8.6 |
| S24 | RP18 | MedF | 2 | 5 | 1 | 3 | 9.3 |
| S24 | RP18 | MedF | 2 | 5 | 1 | 1 | 9.8 |
| S24 | RP18 | MedF | 1 | 1 | 1 | 2 | 9.5 |
| S24 | RP18 | MedF | 1 | 1 | 1 | 3 | 8.6 |
| S24 | RP18 | MedF | 1 | 1 | 1 | 1 | 8.4 |
| S24 | RP18 | MedF | 2 | 1 | 1 | 2 | 9.1 |
| S24 | RP18 | MedF | 2 | 1 | 1 | 3 | 8.5 |
| S24 | RP18 | MedF | 2 | 1 | 1 | 1 | 9.5 |
| S25 | RP14 | DxT | 1 | 1 | 1 | 3 | 4.7 |
| S25 | RP14 | DxT | 1 | 1 | 1 | 1 | 10.8 |
| S25 | RP14 | DxT | 1 | 1 | 1 | 2 | 10.5 |
| S25 | RP14 | DxT | 2 | 1 | 1 | 3 | 10.3 |
| S25 | RP14 | DxT | 2 | 1 | 1 | 1 | 10.1 |
| S25 | RP14 | DxT | 2 | 1 | 1 | 2 | 10.7 |
| S25 | RP14 | Kashi | 1 | 1 | 1 | 2 | 10.7 |
| S25 | RP14 | Kashi | 1 | 1 | 1 | 3 | 10.1 |
| S25 | RP14 | Kashi | 1 | 1 | 1 | 1 | 11.1 |
| S25 | RP14 | Kashi | 1 | 2 | 1 | 2 | 10.6 |
| S25 | RP14 | Kashi | 1 | 2 | 1 | 3 | 10.4 |
| S25 | RP14 | Kashi | 1 | 2 | 1 | 1 | 10.4 |
| S25 | RP14 | Kashi | 2 | 1 | 1 | 2 | 11.3 |
| S25 | RP14 | Kashi | 2 | 1 | 1 | 3 | 12.3 |
| S25 | RP14 | Kashi | 2 | 1 | 1 | 1 | 11 |
| S25 | RP14 | Kashi | 2 | 2 | 1 | 2 | 9.8 |
| S25 | RP14 | Kashi | 2 | 2 | 1 | 3 | 10.6 |
| S25 | RP14 | Kashi | 2 | 2 | 1 | 1 | 10.8 |
| S25 | RP14 | DxT | 2 | 2 | 1 | 3 | 10.3 |
| S25 | RP14 | DxT | 2 | 2 | 1 | 1 | 10 |
| S25 | RP14 | DxT | 2 | 2 | 1 | 2 | 10.6 |
| S25 | RP14 | DxT | 1 | 2 | 1 | 3 | 10.3 |
| S25 | RP14 | DxT | 1 | 2 | 1 | 1 | 10.3 |
| S25 | RP14 | DxT | 1 | 2 | 1 | 2 | 10.4 |
| S25 | RP14 | DxT | 2 | 1 | 2 | 3 | 10.8 |
| S25 | RP14 | DxT | 2 | 1 | 2 | 1 | 13.1 |
| S25 | RP14 | DxT | 2 | 1 | 2 | 2 | 10.8 |
| S25 | RP14 | DxT | 1 | 3 | 1 | 3 | 9.6 |
| S25 | RP14 | DxT | 1 | 3 | 1 | 1 | 10.5 |
| S25 | RP14 | DxT | 1 | 3 | 1 | 2 | 10.3 |
| S25 | RP14 | DxT | 1 | 3 | 2 | 3 | 10.3 |
| S25 | RP14 | DxT | 1 | 3 | 2 | 1 | 10.2 |
| S25 | RP14 | DxT | 1 | 3 | 2 | 2 | 10 |
| S25 | RP14 | DxT | 2 | 3 | 1 | 3 | 10.2 |
| S25 | RP14 | DxT | 2 | 3 | 1 | 1 | 9.8 |
| S25 | RP14 | DxT | 2 | 3 | 1 | 2 | 10.7 |
| S25 | RP14 | DxT | 2 | 3 | 2 | 3 | 12.5 |
| S25 | RP14 | DxT | 2 | 3 | 2 | 1 | 10.9 |
| S25 | RP14 | DxT | 2 | 3 | 2 | 2 | 10.4 |
| S25 | RP14 | Kashi | 1 | 3 | 1 | 2 | 10.5 |
| S25 | RP14 | Kashi | 1 | 3 | 1 | 3 | 9.9 |
| S25 | RP14 | Kashi | 1 | 3 | 1 | 1 | 10.8 |
| S25 | RP14 | Kashi | 1 | 4 | 1 | 2 | 10.5 |
| S25 | RP14 | Kashi | 1 | 4 | 1 | 3 | 10.3 |
| S25 | RP14 | Kashi | 1 | 4 | 1 | 1 | 11.5 |
| S25 | RP14 | Kashi | 1 | 5 | 1 | 2 | 11.1 |
| S25 | RP14 | Kashi | 1 | 5 | 1 | 3 | 11.4 |
| S25 | RP14 | Kashi | 1 | 5 | 1 | 1 | 10.7 |
| S25 | RP14 | Kashi | 2 | 3 | 1 | 2 | 10.6 |
| S25 | RP14 | Kashi | 2 | 3 | 1 | 3 | 4.9 |
| S25 | RP14 | Kashi | 2 | 3 | 1 | 1 | 10.7 |
| S25 | RP14 | Kashi | 2 | 4 | 1 | 3 | 10 |
| S25 | RP14 | Kashi | 2 | 4 | 1 | 1 | 7.8 |
| S25 | RP14 | Kashi | 2 | 5 | 1 | 2 | 11.4 |
| S25 | RP14 | Kashi | 2 | 5 | 1 | 3 | 9.4 |
| S25 | RP14 | Kashi | 2 | 5 | 1 | 1 | 11.3 |
| S25 | RP14 | DxT | 2 | 4 | 1 | 3 | 10.2 |
| S25 | RP14 | DxT | 2 | 4 | 1 | 1 | 9.6 |
| S25 | RP14 | DxT | 2 | 4 | 1 | 2 | 11.3 |
| S25 | RP14 | DxT | 2 | 4 | 2 | 3 | 10.6 |
| S25 | RP14 | DxT | 2 | 4 | 2 | 1 | 10.5 |
| S25 | RP14 | DxT | 2 | 4 | 2 | 2 | 9.8 |
| S25 | RP14 | DxT | 1 | 4 | 2 | 3 | 9.2 |
| S25 | RP14 | DxT | 1 | 4 | 2 | 1 | 10 |
| S25 | RP14 | DxT | 1 | 4 | 2 | 2 | 10.6 |
| S25 | RP14 | DxT | 1 | 5 | 1 | 3 | 10.2 |
| S25 | RP14 | DxT | 1 | 5 | 1 | 1 | 10 |
| S25 | RP14 | DxT | 1 | 5 | 1 | 2 | 10.1 |
| S25 | RP14 | DxT | 1 | 5 | 2 | 3 | 10 |
| S25 | RP14 | DxT | 1 | 5 | 2 | 1 | 10.6 |
| S25 | RP14 | DxT | 1 | 5 | 2 | 2 | 10.1 |
| S25 | RP14 | DxT | 2 | 5 | 1 | 3 | 10 |
| S25 | RP14 | DxT | 2 | 5 | 1 | 1 | 10 |
| S25 | RP14 | DxT | 2 | 5 | 1 | 2 | 10.6 |
| S25 | RP14 | DxT | 2 | 2 | 2 | 3 | 9.7 |
| S25 | RP14 | DxT | 2 | 2 | 2 | 1 | 10.5 |
| S25 | RP14 | DxT | 2 | 2 | 2 | 2 | 11.1 |
| S25 | RP14 | DxT | 1 | 2 | 2 | 3 | 10.1 |
| S25 | RP14 | DxT | 1 | 2 | 2 | 1 | 10.2 |
| S25 | RP14 | DxT | 1 | 2 | 2 | 2 | 11.4 |
| S25 | RP14 | DxT | 2 | 5 | 2 | 3 | 10 |
| S25 | RP14 | DxT | 2 | 5 | 2 | 1 | 10 |
| S25 | RP14 | DxT | 2 | 5 | 2 | 2 | 9.6 |
| S25 | RP14 | DxT | 1 | 4 | 1 | 3 | 10.1 |
| S25 | RP14 | DxT | 1 | 4 | 1 | 1 | 11.2 |
| S25 | RP14 | DxT | 1 | 4 | 1 | 2 | 10.3 |
| S25 | RP14 | DxT | 1 | 1 | 2 | 3 | 10.4 |
| S25 | RP14 | DxT | 1 | 1 | 2 | 1 | 11.2 |
| S25 | RP14 | DxT | 1 | 1 | 2 | 2 | 10 |
| S25 | RP14 | Kashi | 2 | 4 | 1 | 2 | 11.5 |
| S25 | RP14 | MedF | 2 | 3 | 1 | 3 | 10.7 |
| S25 | RP14 | MedF | 2 | 3 | 1 | 1 | 11.9 |
| S25 | RP14 | MedF | 2 | 3 | 1 | 2 | 10.6 |
| S25 | RP14 | MedF | 1 | 3 | 1 | 3 | 9.8 |
| S25 | RP14 | MedF | 1 | 3 | 1 | 1 | 11.1 |
| S25 | RP14 | MedF | 1 | 3 | 1 | 2 | 10.7 |
| S25 | RP14 | MedF | 2 | 2 | 1 | 3 | 10.6 |
| S25 | RP14 | MedF | 2 | 2 | 1 | 1 | 11 |
| S25 | RP14 | MedF | 2 | 2 | 1 | 2 | 11.2 |
| S25 | RP14 | MedF | 1 | 2 | 1 | 3 | 10.5 |
| S25 | RP14 | MedF | 1 | 2 | 1 | 1 | 10.1 |
| S25 | RP14 | MedF | 1 | 2 | 1 | 2 | 10.9 |
| S25 | RP14 | MedF | 1 | 4 | 1 | 3 | 11.1 |
| S25 | RP14 | MedF | 1 | 4 | 1 | 1 | 11.8 |
| S25 | RP14 | MedF | 1 | 4 | 1 | 2 | 11.1 |
| S25 | RP14 | MedF | 2 | 4 | 1 | 3 | 10.4 |
| S25 | RP14 | MedF | 2 | 4 | 1 | 1 | 11.3 |
| S25 | RP14 | MedF | 2 | 4 | 1 | 2 | 11 |
| S25 | RP14 | MedF | 1 | 5 | 1 | 3 | 10.9 |
| S25 | RP14 | MedF | 1 | 5 | 1 | 1 | 10.8 |
| S25 | RP14 | MedF | 1 | 5 | 1 | 2 | 10.6 |
| S25 | RP14 | MedF | 2 | 5 | 1 | 3 | 10.4 |
| S25 | RP14 | MedF | 2 | 5 | 1 | 1 | 10.2 |
| S25 | RP14 | MedF | 2 | 5 | 1 | 2 | 10.2 |
| S25 | RP14 | MedF | 1 | 1 | 1 | 3 | 10.3 |
| S25 | RP14 | MedF | 1 | 1 | 1 | 1 | 10.5 |
| S25 | RP14 | MedF | 1 | 1 | 1 | 2 | 10.3 |
| S25 | RP14 | MedF | 2 | 1 | 1 | 3 | 10.5 |
| S25 | RP14 | MedF | 2 | 1 | 1 | 1 | 10.3 |
| S25 | RP14 | MedF | 2 | 1 | 1 | 2 | 9.5 |
| S3 | RP23 | DxT | 1 | 1 | 1 | 3 | 1.3 |
| S3 | RP23 | DxT | 1 | 1 | 1 | 1 | 1.2 |
| S3 | RP23 | DxT | 1 | 1 | 1 | 2 | 1.3 |
| S3 | RP23 | DxT | 2 | 1 | 1 | 3 | 1.3 |
| S3 | RP23 | DxT | 2 | 1 | 1 | 1 | 1.1 |
| S3 | RP23 | DxT | 2 | 1 | 1 | 2 | 1.4 |
| S3 | RP23 | Kashi | 1 | 1 | 1 | 1 | 1.4 |
| S3 | RP23 | Kashi | 1 | 1 | 1 | 3 | 1.4 |
| S3 | RP23 | Kashi | 1 | 1 | 1 | 2 | 1.4 |
| S3 | RP23 | Kashi | 1 | 2 | 1 | 1 | 1.6 |
| S3 | RP23 | Kashi | 1 | 2 | 1 | 3 | 1.6 |
| S3 | RP23 | Kashi | 1 | 2 | 1 | 2 | 1.7 |
| S3 | RP23 | Kashi | 2 | 1 | 1 | 1 | 2 |
| S3 | RP23 | Kashi | 2 | 1 | 1 | 3 | 2.2 |
| S3 | RP23 | Kashi | 2 | 1 | 1 | 2 | 1.8 |
| S3 | RP23 | Kashi | 2 | 2 | 1 | 1 | 1.5 |
| S3 | RP23 | Kashi | 2 | 2 | 1 | 3 | 1.6 |
| S3 | RP23 | Kashi | 2 | 2 | 1 | 2 | 1.5 |
| S3 | RP23 | DxT | 2 | 2 | 1 | 3 | 1.3 |
| S3 | RP23 | DxT | 2 | 2 | 1 | 1 | 1.4 |
| S3 | RP23 | DxT | 2 | 2 | 1 | 2 | 1.4 |
| S3 | RP23 | DxT | 1 | 2 | 1 | 3 | 1.3 |
| S3 | RP23 | DxT | 1 | 2 | 1 | 1 | 1.3 |
| S3 | RP23 | DxT | 1 | 2 | 1 | 2 | 1.4 |
| S3 | RP23 | DxT | 2 | 1 | 2 | 3 | 1.6 |
| S3 | RP23 | DxT | 2 | 1 | 2 | 1 | 1.7 |
| S3 | RP23 | DxT | 2 | 1 | 2 | 2 | 1.6 |
| S3 | RP23 | DxT | 1 | 3 | 1 | 3 | 1.3 |
| S3 | RP23 | DxT | 1 | 3 | 1 | 1 | 1.4 |
| S3 | RP23 | DxT | 1 | 3 | 1 | 2 | 1.5 |
| S3 | RP23 | DxT | 1 | 3 | 2 | 3 | 1.6 |
| S3 | RP23 | DxT | 1 | 3 | 2 | 1 | 1.7 |
| S3 | RP23 | DxT | 1 | 3 | 2 | 2 | 1.6 |
| S3 | RP23 | DxT | 2 | 3 | 1 | 3 | 1.5 |
| S3 | RP23 | DxT | 2 | 3 | 1 | 1 | 1.5 |
| S3 | RP23 | DxT | 2 | 3 | 1 | 2 | 1.4 |
| S3 | RP23 | DxT | 2 | 3 | 2 | 3 | 1.8 |
| S3 | RP23 | DxT | 2 | 3 | 2 | 1 | 1.7 |
| S3 | RP23 | DxT | 2 | 3 | 2 | 2 | 1.9 |
| S3 | RP23 | Kashi | 1 | 3 | 1 | 1 | 1.3 |
| S3 | RP23 | Kashi | 1 | 3 | 1 | 3 | 1.2 |
| S3 | RP23 | Kashi | 1 | 3 | 1 | 2 | 1.4 |
| S3 | RP23 | Kashi | 1 | 4 | 1 | 1 | 1.6 |
| S3 | RP23 | Kashi | 1 | 4 | 1 | 3 | 1.5 |
| S3 | RP23 | Kashi | 1 | 4 | 1 | 2 | 1.7 |
| S3 | RP23 | Kashi | 1 | 5 | 1 | 1 | 1.5 |
| S3 | RP23 | Kashi | 1 | 5 | 1 | 3 | 1.4 |
| S3 | RP23 | Kashi | 1 | 5 | 1 | 2 | 1.6 |
| S3 | RP23 | Kashi | 2 | 3 | 1 | 1 | 1.6 |
| S3 | RP23 | Kashi | 2 | 3 | 1 | 3 | 1.5 |
| S3 | RP23 | Kashi | 2 | 3 | 1 | 2 | 1.6 |
| S3 | RP23 | Kashi | 2 | 4 | 1 | 1 | 1.6 |
| S3 | RP23 | Kashi | 2 | 4 | 1 | 3 | 1.4 |
| S3 | RP23 | Kashi | 2 | 4 | 1 | 2 | 1.7 |
| S3 | RP23 | Kashi | 2 | 5 | 1 | 1 | 1.6 |
| S3 | RP23 | Kashi | 2 | 5 | 1 | 3 | 1.8 |
| S3 | RP23 | Kashi | 2 | 5 | 1 | 2 | 1.7 |
| S3 | RP23 | DxT | 2 | 4 | 1 | 3 | 1.3 |
| S3 | RP23 | DxT | 2 | 4 | 1 | 1 | 1.5 |
| S3 | RP23 | DxT | 2 | 4 | 1 | 2 | 1.5 |
| S3 | RP23 | DxT | 2 | 4 | 2 | 3 | 1.6 |
| S3 | RP23 | DxT | 2 | 4 | 2 | 1 | 1.7 |
| S3 | RP23 | DxT | 2 | 4 | 2 | 2 | 1.5 |
| S3 | RP23 | DxT | 1 | 4 | 2 | 3 | 1.6 |
| S3 | RP23 | DxT | 1 | 4 | 2 | 1 | 1.8 |
| S3 | RP23 | DxT | 1 | 4 | 2 | 2 | 1.7 |
| S3 | RP23 | DxT | 1 | 5 | 1 | 3 | 1.3 |
| S3 | RP23 | DxT | 1 | 5 | 1 | 1 | 1.3 |
| S3 | RP23 | DxT | 1 | 5 | 1 | 2 | 1.4 |
| S3 | RP23 | DxT | 1 | 5 | 2 | 3 | 1.5 |
| S3 | RP23 | DxT | 1 | 5 | 2 | 1 | 1.6 |
| S3 | RP23 | DxT | 1 | 5 | 2 | 2 | 1.6 |
| S3 | RP23 | DxT | 2 | 5 | 1 | 3 | 1.4 |
| S3 | RP23 | DxT | 2 | 5 | 1 | 1 | 1.6 |
| S3 | RP23 | DxT | 2 | 5 | 1 | 2 | 1.3 |
| S3 | RP23 | DxT | 2 | 2 | 2 | 3 | 1.5 |
| S3 | RP23 | DxT | 2 | 2 | 2 | 1 | 1.7 |
| S3 | RP23 | DxT | 2 | 2 | 2 | 2 | 1.6 |
| S3 | RP23 | DxT | 1 | 2 | 2 | 3 | 1.6 |
| S3 | RP23 | DxT | 1 | 2 | 2 | 1 | 1.5 |
| S3 | RP23 | DxT | 1 | 2 | 2 | 2 | 1.6 |
| S3 | RP23 | DxT | 2 | 5 | 2 | 3 | 1.4 |
| S3 | RP23 | DxT | 2 | 5 | 2 | 1 | 1.6 |
| S3 | RP23 | DxT | 2 | 5 | 2 | 2 | 1.5 |
| S3 | RP23 | DxT | 1 | 4 | 1 | 3 | 1.3 |
| S3 | RP23 | DxT | 1 | 4 | 1 | 1 | 1.4 |
| S3 | RP23 | DxT | 1 | 4 | 1 | 2 | 1.4 |
| S3 | RP23 | DxT | 1 | 1 | 2 | 3 | 1.6 |
| S3 | RP23 | DxT | 1 | 1 | 2 | 1 | 1.7 |
| S3 | RP23 | DxT | 1 | 1 | 2 | 2 | 1.8 |
| S3 | RP23 | MedF | 2 | 3 | 1 | 3 | 1.5 |
| S3 | RP23 | MedF | 2 | 3 | 1 | 1 | 1.4 |
| S3 | RP23 | MedF | 2 | 3 | 1 | 2 | 1.8 |
| S3 | RP23 | MedF | 1 | 3 | 1 | 3 | 1.9 |
| S3 | RP23 | MedF | 1 | 3 | 1 | 1 | 1.7 |
| S3 | RP23 | MedF | 1 | 3 | 1 | 2 | 1.6 |
| S3 | RP23 | MedF | 2 | 2 | 1 | 3 | 1.7 |
| S3 | RP23 | MedF | 2 | 2 | 1 | 1 | 1.9 |
| S3 | RP23 | MedF | 2 | 2 | 1 | 2 | 1.6 |
| S3 | RP23 | MedF | 1 | 2 | 1 | 3 | 1.6 |
| S3 | RP23 | MedF | 1 | 2 | 1 | 1 | 1.7 |
| S3 | RP23 | MedF | 1 | 2 | 1 | 2 | 1.6 |
| S3 | RP23 | MedF | 1 | 4 | 1 | 3 | 1.7 |
| S3 | RP23 | MedF | 1 | 4 | 1 | 1 | 1.5 |
| S3 | RP23 | MedF | 1 | 4 | 1 | 2 | 1.6 |
| S3 | RP23 | MedF | 2 | 4 | 1 | 3 | 1.8 |
| S3 | RP23 | MedF | 2 | 4 | 1 | 1 | 1.9 |
| S3 | RP23 | MedF | 2 | 4 | 1 | 2 | 2.4 |
| S3 | RP23 | MedF | 1 | 5 | 1 | 3 | 1.6 |
| S3 | RP23 | MedF | 1 | 5 | 1 | 1 | 1.7 |
| S3 | RP23 | MedF | 1 | 5 | 1 | 2 | 1.6 |
| S3 | RP23 | MedF | 2 | 5 | 1 | 3 | 1.3 |
| S3 | RP23 | MedF | 2 | 5 | 1 | 1 | 1.4 |
| S3 | RP23 | MedF | 2 | 5 | 1 | 2 | 1.5 |
| S3 | RP23 | MedF | 1 | 1 | 1 | 3 | 1.3 |
| S3 | RP23 | MedF | 1 | 1 | 1 | 1 | 1.5 |
| S3 | RP23 | MedF | 1 | 1 | 1 | 2 | 1.4 |
| S3 | RP23 | MedF | 2 | 1 | 1 | 3 | 1.4 |
| S3 | RP23 | MedF | 2 | 1 | 1 | 1 | 1.5 |
| S3 | RP23 | MedF | 2 | 1 | 1 | 2 | 1.9 |
| S4 | RP22 | DxT | 1 | 1 | 1 | 3 | 1.2 |
| S4 | RP22 | DxT | 1 | 1 | 1 | 1 | 1.8 |
| S4 | RP22 | DxT | 1 | 1 | 1 | 2 | 1.7 |
| S4 | RP22 | DxT | 2 | 1 | 1 | 3 | 1.8 |
| S4 | RP22 | DxT | 2 | 1 | 1 | 1 | 1.9 |
| S4 | RP22 | DxT | 2 | 1 | 1 | 2 | 2 |
| S4 | RP22 | Kashi | 1 | 1 | 1 | 3 | 1.6 |
| S4 | RP22 | Kashi | 1 | 1 | 1 | 1 | 1.8 |
| S4 | RP22 | Kashi | 1 | 1 | 1 | 2 | 1.8 |
| S4 | RP22 | Kashi | 1 | 2 | 1 | 3 | 1.8 |
| S4 | RP22 | Kashi | 1 | 2 | 1 | 1 | 2 |
| S4 | RP22 | Kashi | 1 | 2 | 1 | 2 | 2.1 |
| S4 | RP22 | Kashi | 2 | 1 | 1 | 3 | 2 |
| S4 | RP22 | Kashi | 2 | 1 | 1 | 1 | 2.3 |
| S4 | RP22 | Kashi | 2 | 1 | 1 | 2 | 2.3 |
| S4 | RP22 | Kashi | 2 | 2 | 1 | 3 | 2 |
| S4 | RP22 | Kashi | 2 | 2 | 1 | 1 | 1.9 |
| S4 | RP22 | Kashi | 2 | 2 | 1 | 2 | 2.1 |
| S4 | RP22 | DxT | 2 | 2 | 1 | 3 | 1.7 |
| S4 | RP22 | DxT | 2 | 2 | 1 | 1 | 2 |
| S4 | RP22 | DxT | 2 | 2 | 1 | 2 | 1.9 |
| S4 | RP22 | DxT | 1 | 2 | 1 | 3 | 1.8 |
| S4 | RP22 | DxT | 1 | 2 | 1 | 1 | 1.7 |
| S4 | RP22 | DxT | 1 | 2 | 1 | 2 | 1.9 |
| S4 | RP22 | DxT | 2 | 1 | 2 | 3 | 2.1 |
| S4 | RP22 | DxT | 2 | 1 | 2 | 1 | 2.2 |
| S4 | RP22 | DxT | 2 | 1 | 2 | 2 | 2 |
| S4 | RP22 | DxT | 1 | 3 | 1 | 3 | 1.7 |
| S4 | RP22 | DxT | 1 | 3 | 1 | 1 | 1.9 |
| S4 | RP22 | DxT | 1 | 3 | 1 | 2 | 1.8 |
| S4 | RP22 | DxT | 1 | 3 | 2 | 3 | 2 |
| S4 | RP22 | DxT | 1 | 3 | 2 | 1 | 2 |
| S4 | RP22 | DxT | 1 | 3 | 2 | 2 | 1.9 |
| S4 | RP22 | DxT | 2 | 3 | 1 | 3 | 2 |
| S4 | RP22 | DxT | 2 | 3 | 1 | 1 | 1.9 |
| S4 | RP22 | DxT | 2 | 3 | 1 | 2 | 1.8 |
| S4 | RP22 | DxT | 2 | 3 | 2 | 3 | 2.1 |
| S4 | RP22 | DxT | 2 | 3 | 2 | 1 | 2.2 |
| S4 | RP22 | DxT | 2 | 3 | 2 | 2 | 2.2 |
| S4 | RP22 | Kashi | 1 | 3 | 1 | 3 | 1.6 |
| S4 | RP22 | Kashi | 1 | 3 | 1 | 1 | 1.9 |
| S4 | RP22 | Kashi | 1 | 3 | 1 | 2 | 1.9 |
| S4 | RP22 | Kashi | 1 | 4 | 1 | 3 | 1.8 |
| S4 | RP22 | Kashi | 1 | 4 | 1 | 1 | 2.1 |
| S4 | RP22 | Kashi | 1 | 4 | 1 | 2 | 2 |
| S4 | RP22 | Kashi | 1 | 5 | 1 | 3 | 1.9 |
| S4 | RP22 | Kashi | 1 | 5 | 1 | 1 | 2 |
| S4 | RP22 | Kashi | 1 | 5 | 1 | 2 | 1.9 |
| S4 | RP22 | Kashi | 2 | 3 | 1 | 3 | 1.5 |
| S4 | RP22 | Kashi | 2 | 3 | 1 | 1 | 2 |
| S4 | RP22 | Kashi | 2 | 3 | 1 | 2 | 1.8 |
| S4 | RP22 | Kashi | 2 | 4 | 1 | 3 | 1.6 |
| S4 | RP22 | Kashi | 2 | 4 | 1 | 1 | 1.8 |
| S4 | RP22 | Kashi | 2 | 4 | 1 | 2 | 2 |
| S4 | RP22 | Kashi | 2 | 5 | 1 | 3 | 1.8 |
| S4 | RP22 | Kashi | 2 | 5 | 1 | 1 | 2.1 |
| S4 | RP22 | Kashi | 2 | 5 | 1 | 2 | 2.1 |
| S4 | RP22 | DxT | 2 | 4 | 1 | 3 | 1.7 |
| S4 | RP22 | DxT | 2 | 4 | 1 | 1 | 1.9 |
| S4 | RP22 | DxT | 2 | 4 | 1 | 2 | 1.9 |
| S4 | RP22 | DxT | 2 | 4 | 2 | 3 | 1.9 |
| S4 | RP22 | DxT | 2 | 4 | 2 | 1 | 1.9 |
| S4 | RP22 | DxT | 2 | 4 | 2 | 2 | 2 |
| S4 | RP22 | DxT | 1 | 4 | 2 | 3 | 1.8 |
| S4 | RP22 | DxT | 1 | 4 | 2 | 1 | 2 |
| S4 | RP22 | DxT | 1 | 4 | 2 | 2 | 2.1 |
| S4 | RP22 | DxT | 1 | 5 | 1 | 3 | 1.9 |
| S4 | RP22 | DxT | 1 | 5 | 1 | 1 | 1.7 |
| S4 | RP22 | DxT | 1 | 5 | 1 | 2 | 1.9 |
| S4 | RP22 | DxT | 1 | 5 | 2 | 3 | 1.7 |
| S4 | RP22 | DxT | 1 | 5 | 2 | 1 | 2 |
| S4 | RP22 | DxT | 1 | 5 | 2 | 2 | 2 |
| S4 | RP22 | DxT | 2 | 5 | 1 | 3 | 1.9 |
| S4 | RP22 | DxT | 2 | 5 | 1 | 1 | 1.9 |
| S4 | RP22 | DxT | 2 | 5 | 1 | 2 | 1.8 |
| S4 | RP22 | DxT | 2 | 2 | 2 | 3 | 2 |
| S4 | RP22 | DxT | 2 | 2 | 2 | 1 | 2 |
| S4 | RP22 | DxT | 2 | 2 | 2 | 2 | 1.9 |
| S4 | RP22 | DxT | 1 | 2 | 2 | 3 | 2 |
| S4 | RP22 | DxT | 1 | 2 | 2 | 1 | 2 |
| S4 | RP22 | DxT | 1 | 2 | 2 | 2 | 2.2 |
| S4 | RP22 | DxT | 2 | 5 | 2 | 3 | 1.9 |
| S4 | RP22 | DxT | 2 | 5 | 2 | 1 | 1.8 |
| S4 | RP22 | DxT | 2 | 5 | 2 | 2 | 1.9 |
| S4 | RP22 | DxT | 1 | 4 | 1 | 3 | 1.8 |
| S4 | RP22 | DxT | 1 | 4 | 1 | 1 | 1.8 |
| S4 | RP22 | DxT | 1 | 4 | 1 | 2 | 1.9 |
| S4 | RP22 | DxT | 1 | 1 | 2 | 3 | 1.9 |
| S4 | RP22 | DxT | 1 | 1 | 2 | 1 | 1.9 |
| S4 | RP22 | DxT | 1 | 1 | 2 | 2 | 1.9 |
| S4 | RP22 | MedF | 2 | 3 | 1 | 3 | 2 |
| S4 | RP22 | MedF | 2 | 3 | 1 | 1 | 2 |
| S4 | RP22 | MedF | 2 | 3 | 1 | 2 | 2.1 |
| S4 | RP22 | MedF | 1 | 3 | 1 | 3 | 2.2 |
| S4 | RP22 | MedF | 1 | 3 | 1 | 1 | 1.9 |
| S4 | RP22 | MedF | 1 | 3 | 1 | 2 | 2 |
| S4 | RP22 | MedF | 2 | 2 | 1 | 3 | 2.3 |
| S4 | RP22 | MedF | 2 | 2 | 1 | 1 | 2 |
| S4 | RP22 | MedF | 2 | 2 | 1 | 2 | 2.1 |
| S4 | RP22 | MedF | 1 | 2 | 1 | 3 | 2 |
| S4 | RP22 | MedF | 1 | 2 | 1 | 1 | 2 |
| S4 | RP22 | MedF | 1 | 2 | 1 | 2 | 2 |
| S4 | RP22 | MedF | 1 | 4 | 1 | 3 | 2.1 |
| S4 | RP22 | MedF | 1 | 4 | 1 | 1 | 2.1 |
| S4 | RP22 | MedF | 1 | 4 | 1 | 2 | 2.2 |
| S4 | RP22 | MedF | 2 | 4 | 1 | 3 | 1.8 |
| S4 | RP22 | MedF | 2 | 4 | 1 | 1 | 2.3 |
| S4 | RP22 | MedF | 2 | 4 | 1 | 2 | 2.1 |
| S4 | RP22 | MedF | 1 | 5 | 1 | 3 | 1.8 |
| S4 | RP22 | MedF | 1 | 5 | 1 | 1 | 1.9 |
| S4 | RP22 | MedF | 1 | 5 | 1 | 2 | 1.9 |
| S4 | RP22 | MedF | 2 | 5 | 1 | 3 | 1.7 |
| S4 | RP22 | MedF | 2 | 5 | 1 | 1 | 1.9 |
| S4 | RP22 | MedF | 2 | 5 | 1 | 2 | 1.7 |
| S4 | RP22 | MedF | 1 | 1 | 1 | 3 | 1.7 |
| S4 | RP22 | MedF | 1 | 1 | 1 | 1 | 1.7 |
| S4 | RP22 | MedF | 1 | 1 | 1 | 2 | 1.7 |
| S4 | RP22 | MedF | 2 | 1 | 1 | 3 | 1.6 |
| S4 | RP22 | MedF | 2 | 1 | 1 | 1 | 1.8 |
| S4 | RP22 | MedF | 2 | 1 | 1 | 2 | 1.8 |
| S5 | RP8 | DxT | 1 | 1 | 1 | 1 | 2.1 |
| S5 | RP8 | DxT | 1 | 1 | 1 | 3 | 2 |
| S5 | RP8 | DxT | 1 | 1 | 1 | 2 | 1.9 |
| S5 | RP8 | DxT | 2 | 1 | 1 | 1 | 2.1 |
| S5 | RP8 | DxT | 2 | 1 | 1 | 3 | 2 |
| S5 | RP8 | DxT | 2 | 1 | 1 | 2 | 2 |
| S5 | RP8 | Kashi | 1 | 1 | 1 | 2 | 2 |
| S5 | RP8 | Kashi | 1 | 1 | 1 | 1 | 2 |
| S5 | RP8 | Kashi | 1 | 1 | 1 | 3 | 2 |
| S5 | RP8 | Kashi | 1 | 2 | 1 | 2 | 2.2 |
| S5 | RP8 | Kashi | 1 | 2 | 1 | 1 | 2.1 |
| S5 | RP8 | Kashi | 1 | 2 | 1 | 3 | 2.1 |
| S5 | RP8 | Kashi | 2 | 1 | 1 | 2 | 2.4 |
| S5 | RP8 | Kashi | 2 | 1 | 1 | 1 | 2.7 |
| S5 | RP8 | Kashi | 2 | 1 | 1 | 3 | 2.5 |
| S5 | RP8 | Kashi | 2 | 2 | 1 | 2 | 1.9 |
| S5 | RP8 | Kashi | 2 | 2 | 1 | 1 | 2 |
| S5 | RP8 | Kashi | 2 | 2 | 1 | 3 | 2.3 |
| S5 | RP8 | DxT | 2 | 2 | 1 | 1 | 2.1 |
| S5 | RP8 | DxT | 2 | 2 | 1 | 3 | 2.1 |
| S5 | RP8 | DxT | 2 | 2 | 1 | 2 | 1.9 |
| S5 | RP8 | DxT | 1 | 2 | 1 | 1 | 2 |
| S5 | RP8 | DxT | 1 | 2 | 1 | 3 | 2 |
| S5 | RP8 | DxT | 1 | 2 | 1 | 2 | 2.1 |
| S5 | RP8 | DxT | 2 | 1 | 2 | 1 | 2.3 |
| S5 | RP8 | DxT | 2 | 1 | 2 | 3 | 2.1 |
| S5 | RP8 | DxT | 2 | 1 | 2 | 2 | 2.3 |
| S5 | RP8 | DxT | 1 | 3 | 1 | 1 | 2.1 |
| S5 | RP8 | DxT | 1 | 3 | 1 | 3 | 2.1 |
| S5 | RP8 | DxT | 1 | 3 | 1 | 2 | 2.1 |
| S5 | RP8 | DxT | 1 | 3 | 2 | 1 | 2.4 |
| S5 | RP8 | DxT | 1 | 3 | 2 | 3 | 2.1 |
| S5 | RP8 | DxT | 1 | 3 | 2 | 2 | 2.2 |
| S5 | RP8 | DxT | 2 | 3 | 1 | 1 | 2 |
| S5 | RP8 | DxT | 2 | 3 | 1 | 3 | 2.2 |
| S5 | RP8 | DxT | 2 | 3 | 1 | 2 | 2.2 |
| S5 | RP8 | DxT | 2 | 3 | 2 | 1 | 2.3 |
| S5 | RP8 | DxT | 2 | 3 | 2 | 3 | 2.4 |
| S5 | RP8 | DxT | 2 | 3 | 2 | 2 | 2.4 |
| S5 | RP8 | Kashi | 1 | 3 | 1 | 2 | 2.1 |
| S5 | RP8 | Kashi | 1 | 3 | 1 | 1 | 2.1 |
| S5 | RP8 | Kashi | 1 | 3 | 1 | 3 | 1.9 |
| S5 | RP8 | Kashi | 1 | 4 | 1 | 2 | 2.2 |
| S5 | RP8 | Kashi | 1 | 4 | 1 | 1 | 2.2 |
| S5 | RP8 | Kashi | 1 | 4 | 1 | 3 | 2.3 |
| S5 | RP8 | Kashi | 1 | 5 | 1 | 2 | 2.1 |
| S5 | RP8 | Kashi | 1 | 5 | 1 | 1 | 2.1 |
| S5 | RP8 | Kashi | 1 | 5 | 1 | 3 | 2 |
| S5 | RP8 | Kashi | 2 | 3 | 1 | 2 | 1.8 |
| S5 | RP8 | Kashi | 2 | 3 | 1 | 1 | 2 |
| S5 | RP8 | Kashi | 2 | 3 | 1 | 3 | 2 |
| S5 | RP8 | Kashi | 2 | 4 | 1 | 2 | 2.1 |
| S5 | RP8 | Kashi | 2 | 4 | 1 | 1 | 2 |
| S5 | RP8 | Kashi | 2 | 4 | 1 | 3 | 2.1 |
| S5 | RP8 | Kashi | 2 | 5 | 1 | 2 | 2.7 |
| S5 | RP8 | Kashi | 2 | 5 | 1 | 1 | 2.3 |
| S5 | RP8 | Kashi | 2 | 5 | 1 | 3 | 2.4 |
| S5 | RP8 | DxT | 2 | 4 | 1 | 1 | 2.1 |
| S5 | RP8 | DxT | 2 | 4 | 1 | 3 | 1.9 |
| S5 | RP8 | DxT | 2 | 4 | 1 | 2 | 1.8 |
| S5 | RP8 | DxT | 2 | 4 | 2 | 1 | 2.2 |
| S5 | RP8 | DxT | 2 | 4 | 2 | 3 | 2.1 |
| S5 | RP8 | DxT | 2 | 4 | 2 | 2 | 2.2 |
| S5 | RP8 | DxT | 1 | 4 | 2 | 1 | 2.2 |
| S5 | RP8 | DxT | 1 | 4 | 2 | 3 | 2.2 |
| S5 | RP8 | DxT | 1 | 4 | 2 | 2 | 2.2 |
| S5 | RP8 | DxT | 1 | 5 | 1 | 1 | 2 |
| S5 | RP8 | DxT | 1 | 5 | 1 | 3 | 1.9 |
| S5 | RP8 | DxT | 1 | 5 | 1 | 2 | 2.1 |
| S5 | RP8 | DxT | 1 | 5 | 2 | 1 | 2.1 |
| S5 | RP8 | DxT | 1 | 5 | 2 | 3 | 2.2 |
| S5 | RP8 | DxT | 1 | 5 | 2 | 2 | 2.5 |
| S5 | RP8 | DxT | 2 | 5 | 1 | 1 | 2.1 |
| S5 | RP8 | DxT | 2 | 5 | 1 | 3 | 3.6 |
| S5 | RP8 | DxT | 2 | 5 | 1 | 2 | 2.2 |
| S5 | RP8 | DxT | 2 | 2 | 2 | 1 | 2.3 |
| S5 | RP8 | DxT | 2 | 2 | 2 | 3 | 2.3 |
| S5 | RP8 | DxT | 2 | 2 | 2 | 2 | 2.4 |
| S5 | RP8 | DxT | 1 | 2 | 2 | 1 | 2.3 |
| S5 | RP8 | DxT | 1 | 2 | 2 | 3 | 2.3 |
| S5 | RP8 | DxT | 1 | 2 | 2 | 2 | 2.3 |
| S5 | RP8 | DxT | 2 | 5 | 2 | 1 | 2.3 |
| S5 | RP8 | DxT | 2 | 5 | 2 | 3 | 2 |
| S5 | RP8 | DxT | 2 | 5 | 2 | 2 | 2.1 |
| S5 | RP8 | DxT | 1 | 4 | 1 | 1 | 2.2 |
| S5 | RP8 | DxT | 1 | 4 | 1 | 3 | 2.1 |
| S5 | RP8 | DxT | 1 | 4 | 1 | 2 | 2.2 |
| S5 | RP8 | DxT | 1 | 1 | 2 | 1 | 2.2 |
| S5 | RP8 | DxT | 1 | 1 | 2 | 3 | 2.2 |
| S5 | RP8 | DxT | 1 | 1 | 2 | 2 | 2.2 |
| S5 | RP8 | MedF | 2 | 3 | 1 | 1 | 2.5 |
| S5 | RP8 | MedF | 2 | 3 | 1 | 3 | 2.3 |
| S5 | RP8 | MedF | 2 | 3 | 1 | 2 | 2.3 |
| S5 | RP8 | MedF | 1 | 3 | 1 | 1 | 2.3 |
| S5 | RP8 | MedF | 1 | 3 | 1 | 3 | 2.2 |
| S5 | RP8 | MedF | 1 | 3 | 1 | 2 | 2.3 |
| S5 | RP8 | MedF | 2 | 2 | 1 | 1 | 2.4 |
| S5 | RP8 | MedF | 2 | 2 | 1 | 3 | 2.1 |
| S5 | RP8 | MedF | 2 | 2 | 1 | 2 | 2.5 |
| S5 | RP8 | MedF | 1 | 2 | 1 | 1 | 2.5 |
| S5 | RP8 | MedF | 1 | 2 | 1 | 3 | 2.4 |
| S5 | RP8 | MedF | 1 | 2 | 1 | 2 | 2.2 |
| S5 | RP8 | MedF | 1 | 4 | 1 | 1 | 2.3 |
| S5 | RP8 | MedF | 1 | 4 | 1 | 3 | 2.2 |
| S5 | RP8 | MedF | 1 | 4 | 1 | 2 | 2.3 |
| S5 | RP8 | MedF | 2 | 4 | 1 | 1 | 2.2 |
| S5 | RP8 | MedF | 2 | 4 | 1 | 3 | 2.4 |
| S5 | RP8 | MedF | 2 | 4 | 1 | 2 | 2.4 |
| S5 | RP8 | MedF | 1 | 5 | 1 | 1 | 2.1 |
| S5 | RP8 | MedF | 1 | 5 | 1 | 3 | 2.2 |
| S5 | RP8 | MedF | 1 | 5 | 1 | 2 | 2.3 |
| S5 | RP8 | MedF | 2 | 5 | 1 | 1 | 2.2 |
| S5 | RP8 | MedF | 2 | 5 | 1 | 3 | 2 |
| S5 | RP8 | MedF | 2 | 5 | 1 | 2 | 2.4 |
| S5 | RP8 | MedF | 1 | 1 | 1 | 1 | 2 |
| S5 | RP8 | MedF | 1 | 1 | 1 | 3 | 1.9 |
| S5 | RP8 | MedF | 1 | 1 | 1 | 2 | 1.9 |
| S5 | RP8 | MedF | 2 | 1 | 1 | 1 | 2.1 |
| S5 | RP8 | MedF | 2 | 1 | 1 | 3 | 1.8 |
| S5 | RP8 | MedF | 2 | 1 | 1 | 2 | 2.3 |
| S6 | RP27 | DxT | 1 | 1 | 1 | 2 | 2.7 |
| S6 | RP27 | DxT | 1 | 1 | 1 | 3 | 2.9 |
| S6 | RP27 | DxT | 1 | 1 | 1 | 1 | 2.8 |
| S6 | RP27 | DxT | 2 | 1 | 1 | 2 | 2.8 |
| S6 | RP27 | DxT | 2 | 1 | 1 | 3 | 2.7 |
| S6 | RP27 | DxT | 2 | 1 | 1 | 1 | 2.9 |
| S6 | RP27 | Kashi | 1 | 1 | 1 | 2 | 2.5 |
| S6 | RP27 | Kashi | 1 | 1 | 1 | 3 | 3 |
| S6 | RP27 | Kashi | 1 | 1 | 1 | 1 | 2.7 |
| S6 | RP27 | Kashi | 1 | 2 | 1 | 2 | 2.7 |
| S6 | RP27 | Kashi | 1 | 2 | 1 | 3 | 2.7 |
| S6 | RP27 | Kashi | 1 | 2 | 1 | 1 | 2.9 |
| S6 | RP27 | Kashi | 2 | 1 | 1 | 2 | 2.7 |
| S6 | RP27 | Kashi | 2 | 1 | 1 | 1 | 3.4 |
| S6 | RP27 | Kashi | 2 | 2 | 1 | 2 | 3 |
| S6 | RP27 | Kashi | 2 | 2 | 1 | 3 | 2.7 |
| S6 | RP27 | Kashi | 2 | 2 | 1 | 1 | 2.9 |
| S6 | RP27 | DxT | 2 | 2 | 1 | 2 | 2.7 |
| S6 | RP27 | DxT | 2 | 2 | 1 | 3 | 2.8 |
| S6 | RP27 | DxT | 2 | 2 | 1 | 1 | 2.8 |
| S6 | RP27 | DxT | 1 | 2 | 1 | 2 | 2.5 |
| S6 | RP27 | DxT | 1 | 2 | 1 | 3 | 2.8 |
| S6 | RP27 | DxT | 1 | 2 | 1 | 1 | 2.7 |
| S6 | RP27 | DxT | 2 | 1 | 2 | 2 | 3 |
| S6 | RP27 | DxT | 2 | 1 | 2 | 3 | 3 |
| S6 | RP27 | DxT | 2 | 1 | 2 | 1 | 3.1 |
| S6 | RP27 | DxT | 1 | 3 | 1 | 2 | 2.7 |
| S6 | RP27 | DxT | 1 | 3 | 1 | 3 | 2.8 |
| S6 | RP27 | DxT | 1 | 3 | 1 | 1 | 3 |
| S6 | RP27 | DxT | 1 | 3 | 2 | 2 | 2.7 |
| S6 | RP27 | DxT | 1 | 3 | 2 | 3 | 2.8 |
| S6 | RP27 | DxT | 1 | 3 | 2 | 1 | 2.8 |
| S6 | RP27 | DxT | 2 | 3 | 1 | 2 | 2.7 |
| S6 | RP27 | DxT | 2 | 3 | 1 | 3 | 3.1 |
| S6 | RP27 | DxT | 2 | 3 | 1 | 1 | 2.8 |
| S6 | RP27 | DxT | 2 | 3 | 2 | 2 | 3 |
| S6 | RP27 | DxT | 2 | 3 | 2 | 3 | 3 |
| S6 | RP27 | DxT | 2 | 3 | 2 | 1 | 3.3 |
| S6 | RP27 | Kashi | 1 | 3 | 1 | 2 | 2.6 |
| S6 | RP27 | Kashi | 1 | 3 | 1 | 3 | 2.5 |
| S6 | RP27 | Kashi | 1 | 3 | 1 | 1 | 2.5 |
| S6 | RP27 | Kashi | 1 | 4 | 1 | 2 | 2.9 |
| S6 | RP27 | Kashi | 1 | 4 | 1 | 3 | 2.8 |
| S6 | RP27 | Kashi | 1 | 4 | 1 | 1 | 2.8 |
| S6 | RP27 | Kashi | 1 | 5 | 1 | 2 | 2.6 |
| S6 | RP27 | Kashi | 1 | 5 | 1 | 3 | 2.8 |
| S6 | RP27 | Kashi | 1 | 5 | 1 | 1 | 2.7 |
| S6 | RP27 | Kashi | 2 | 3 | 1 | 2 | 2.6 |
| S6 | RP27 | Kashi | 2 | 3 | 1 | 3 | 3.3 |
| S6 | RP27 | Kashi | 2 | 3 | 1 | 1 | 2.8 |
| S6 | RP27 | Kashi | 2 | 4 | 1 | 2 | 2.7 |
| S6 | RP27 | Kashi | 2 | 4 | 1 | 3 | 2.5 |
| S6 | RP27 | Kashi | 2 | 4 | 1 | 1 | 2.7 |
| S6 | RP27 | Kashi | 2 | 5 | 1 | 2 | 2.7 |
| S6 | RP27 | Kashi | 2 | 5 | 1 | 3 | 2.7 |
| S6 | RP27 | Kashi | 2 | 5 | 1 | 1 | 2.6 |
| S6 | RP27 | DxT | 2 | 4 | 1 | 2 | 2.8 |
| S6 | RP27 | DxT | 2 | 4 | 1 | 3 | 2.8 |
| S6 | RP27 | DxT | 2 | 4 | 1 | 1 | 2.9 |
| S6 | RP27 | DxT | 2 | 4 | 2 | 2 | 2.7 |
| S6 | RP27 | DxT | 2 | 4 | 2 | 3 | 2.7 |
| S6 | RP27 | DxT | 2 | 4 | 2 | 1 | 2.6 |
| S6 | RP27 | DxT | 1 | 4 | 2 | 2 | 2.6 |
| S6 | RP27 | DxT | 1 | 4 | 2 | 3 | 2.7 |
| S6 | RP27 | DxT | 1 | 4 | 2 | 1 | 2.9 |
| S6 | RP27 | DxT | 1 | 5 | 1 | 2 | 2.8 |
| S6 | RP27 | DxT | 1 | 5 | 1 | 3 | 2.7 |
| S6 | RP27 | DxT | 1 | 5 | 1 | 1 | 3 |
| S6 | RP27 | DxT | 1 | 5 | 2 | 2 | 2.8 |
| S6 | RP27 | DxT | 1 | 5 | 2 | 3 | 2.8 |
| S6 | RP27 | DxT | 1 | 5 | 2 | 1 | 2.7 |
| S6 | RP27 | DxT | 2 | 5 | 1 | 2 | 2.6 |
| S6 | RP27 | DxT | 2 | 5 | 1 | 3 | 2.6 |
| S6 | RP27 | DxT | 2 | 5 | 1 | 1 | 2.8 |
| S6 | RP27 | DxT | 2 | 2 | 2 | 2 | 2.8 |
| S6 | RP27 | DxT | 2 | 2 | 2 | 3 | 2.9 |
| S6 | RP27 | DxT | 2 | 2 | 2 | 1 | 2.7 |
| S6 | RP27 | DxT | 1 | 2 | 2 | 2 | 3 |
| S6 | RP27 | DxT | 1 | 2 | 2 | 3 | 2.9 |
| S6 | RP27 | DxT | 1 | 2 | 2 | 1 | 2.8 |
| S6 | RP27 | DxT | 2 | 5 | 2 | 2 | 2.9 |
| S6 | RP27 | DxT | 2 | 5 | 2 | 3 | 2.6 |
| S6 | RP27 | DxT | 2 | 5 | 2 | 1 | 2.8 |
| S6 | RP27 | DxT | 1 | 4 | 1 | 2 | 2.6 |
| S6 | RP27 | DxT | 1 | 4 | 1 | 3 | 3 |
| S6 | RP27 | DxT | 1 | 4 | 1 | 1 | 2.9 |
| S6 | RP27 | DxT | 1 | 1 | 2 | 2 | 2.7 |
| S6 | RP27 | DxT | 1 | 1 | 2 | 3 | 2.8 |
| S6 | RP27 | DxT | 1 | 1 | 2 | 1 | 3 |
| S6 | RP27 | Kashi | 2 | 1 | 1 | 3 | 2.7 |
| S6 | RP27 | MedF | 2 | 3 | 1 | 2 | 2.9 |
| S6 | RP27 | MedF | 2 | 3 | 1 | 3 | 2.6 |
| S6 | RP27 | MedF | 2 | 3 | 1 | 1 | 2.8 |
| S6 | RP27 | MedF | 1 | 3 | 1 | 2 | 3 |
| S6 | RP27 | MedF | 1 | 3 | 1 | 3 | 2.8 |
| S6 | RP27 | MedF | 1 | 3 | 1 | 1 | 2.9 |
| S6 | RP27 | MedF | 2 | 2 | 1 | 2 | 2.6 |
| S6 | RP27 | MedF | 2 | 2 | 1 | 3 | 2.8 |
| S6 | RP27 | MedF | 2 | 2 | 1 | 1 | 2.7 |
| S6 | RP27 | MedF | 1 | 2 | 1 | 2 | 2.9 |
| S6 | RP27 | MedF | 1 | 2 | 1 | 3 | 2.8 |
| S6 | RP27 | MedF | 1 | 2 | 1 | 1 | 2.8 |
| S6 | RP27 | MedF | 1 | 4 | 1 | 2 | 2.8 |
| S6 | RP27 | MedF | 1 | 4 | 1 | 3 | 2.8 |
| S6 | RP27 | MedF | 1 | 4 | 1 | 1 | 2.8 |
| S6 | RP27 | MedF | 2 | 4 | 1 | 2 | 3 |
| S6 | RP27 | MedF | 2 | 4 | 1 | 3 | 2.7 |
| S6 | RP27 | MedF | 2 | 4 | 1 | 1 | 2.7 |
| S6 | RP27 | MedF | 1 | 5 | 1 | 2 | 2.9 |
| S6 | RP27 | MedF | 1 | 5 | 1 | 3 | 3 |
| S6 | RP27 | MedF | 1 | 5 | 1 | 1 | 2.8 |
| S6 | RP27 | MedF | 2 | 5 | 1 | 2 | 2.8 |
| S6 | RP27 | MedF | 2 | 5 | 1 | 3 | 2.7 |
| S6 | RP27 | MedF | 2 | 5 | 1 | 1 | 2.8 |
| S6 | RP27 | MedF | 1 | 1 | 1 | 2 | 2.4 |
| S6 | RP27 | MedF | 1 | 1 | 1 | 3 | 2.7 |
| S6 | RP27 | MedF | 1 | 1 | 1 | 1 | 2.6 |
| S6 | RP27 | MedF | 2 | 1 | 1 | 2 | 2.7 |
| S6 | RP27 | MedF | 2 | 1 | 1 | 3 | 2.4 |
| S6 | RP27 | MedF | 2 | 1 | 1 | 1 | 2.7 |
| S7 | RP17 | DxT | 1 | 1 | 1 | 2 | 2.6 |
| S7 | RP17 | DxT | 1 | 1 | 1 | 3 | 2.6 |
| S7 | RP17 | DxT | 1 | 1 | 1 | 1 | 2.8 |
| S7 | RP17 | DxT | 2 | 1 | 1 | 2 | 2.8 |
| S7 | RP17 | DxT | 2 | 1 | 1 | 3 | 2.8 |
| S7 | RP17 | DxT | 2 | 1 | 1 | 1 | 2.8 |
| S7 | RP17 | Kashi | 1 | 1 | 1 | 2 | 2.2 |
| S7 | RP17 | Kashi | 1 | 1 | 1 | 1 | 3 |
| S7 | RP17 | Kashi | 1 | 1 | 1 | 3 | 2.5 |
| S7 | RP17 | Kashi | 1 | 2 | 1 | 2 | 2.6 |
| S7 | RP17 | Kashi | 1 | 2 | 1 | 1 | 2.9 |
| S7 | RP17 | Kashi | 1 | 2 | 1 | 3 | 3.1 |
| S7 | RP17 | Kashi | 2 | 1 | 1 | 2 | 3.6 |
| S7 | RP17 | Kashi | 2 | 1 | 1 | 1 | 3.2 |
| S7 | RP17 | Kashi | 2 | 1 | 1 | 3 | 3.1 |
| S7 | RP17 | Kashi | 2 | 2 | 1 | 2 | 2.8 |
| S7 | RP17 | Kashi | 2 | 2 | 1 | 1 | 2.9 |
| S7 | RP17 | Kashi | 2 | 2 | 1 | 3 | 2.7 |
| S7 | RP17 | DxT | 2 | 2 | 1 | 2 | 2.7 |
| S7 | RP17 | DxT | 2 | 2 | 1 | 3 | 2.7 |
| S7 | RP17 | DxT | 2 | 2 | 1 | 1 | 2.8 |
| S7 | RP17 | DxT | 1 | 2 | 1 | 2 | 2.8 |
| S7 | RP17 | DxT | 1 | 2 | 1 | 3 | 2.7 |
| S7 | RP17 | DxT | 1 | 2 | 1 | 1 | 3 |
| S7 | RP17 | DxT | 2 | 1 | 2 | 2 | 2.8 |
| S7 | RP17 | DxT | 2 | 1 | 2 | 3 | 2.9 |
| S7 | RP17 | DxT | 2 | 1 | 2 | 1 | 3.1 |
| S7 | RP17 | DxT | 1 | 3 | 1 | 2 | 2.8 |
| S7 | RP17 | DxT | 1 | 3 | 1 | 3 | 2.8 |
| S7 | RP17 | DxT | 1 | 3 | 1 | 1 | 3.1 |
| S7 | RP17 | DxT | 1 | 3 | 2 | 2 | 2.8 |
| S7 | RP17 | DxT | 1 | 3 | 2 | 3 | 2.7 |
| S7 | RP17 | DxT | 1 | 3 | 2 | 1 | 3.2 |
| S7 | RP17 | DxT | 2 | 3 | 1 | 2 | 2.7 |
| S7 | RP17 | DxT | 2 | 3 | 1 | 3 | 3 |
| S7 | RP17 | DxT | 2 | 3 | 2 | 2 | 3.1 |
| S7 | RP17 | DxT | 2 | 3 | 2 | 3 | 2.8 |
| S7 | RP17 | DxT | 2 | 3 | 2 | 1 | 2.8 |
| S7 | RP17 | Kashi | 1 | 3 | 1 | 2 | 2.7 |
| S7 | RP17 | Kashi | 1 | 3 | 1 | 1 | 2.5 |
| S7 | RP17 | Kashi | 1 | 3 | 1 | 3 | 2.7 |
| S7 | RP17 | Kashi | 1 | 4 | 1 | 2 | 3 |
| S7 | RP17 | Kashi | 1 | 4 | 1 | 1 | 3 |
| S7 | RP17 | Kashi | 1 | 4 | 1 | 3 | 2.6 |
| S7 | RP17 | Kashi | 1 | 5 | 1 | 2 | 2.6 |
| S7 | RP17 | Kashi | 1 | 5 | 1 | 1 | 2.8 |
| S7 | RP17 | Kashi | 1 | 5 | 1 | 3 | 2.7 |
| S7 | RP17 | Kashi | 2 | 3 | 1 | 2 | 2.5 |
| S7 | RP17 | Kashi | 2 | 3 | 1 | 1 | 2.8 |
| S7 | RP17 | Kashi | 2 | 3 | 1 | 3 | 2.6 |
| S7 | RP17 | Kashi | 2 | 4 | 1 | 2 | 2.4 |
| S7 | RP17 | Kashi | 2 | 4 | 1 | 1 | 2.7 |
| S7 | RP17 | Kashi | 2 | 4 | 1 | 3 | 2.5 |
| S7 | RP17 | Kashi | 2 | 5 | 1 | 2 | 2.8 |
| S7 | RP17 | Kashi | 2 | 5 | 1 | 1 | 2.8 |
| S7 | RP17 | Kashi | 2 | 5 | 1 | 3 | 2.7 |
| S7 | RP17 | DxT | 2 | 4 | 1 | 2 | 2.8 |
| S7 | RP17 | DxT | 2 | 4 | 1 | 3 | 2.8 |
| S7 | RP17 | DxT | 2 | 4 | 1 | 1 | 2.5 |
| S7 | RP17 | DxT | 2 | 4 | 2 | 2 | 3.2 |
| S7 | RP17 | DxT | 2 | 4 | 2 | 3 | 2.6 |
| S7 | RP17 | DxT | 2 | 4 | 2 | 1 | 2.5 |
| S7 | RP17 | DxT | 1 | 4 | 2 | 2 | 2.6 |
| S7 | RP17 | DxT | 1 | 4 | 2 | 3 | 2.7 |
| S7 | RP17 | DxT | 1 | 4 | 2 | 1 | 3 |
| S7 | RP17 | DxT | 1 | 5 | 1 | 2 | 2.8 |
| S7 | RP17 | DxT | 1 | 5 | 1 | 3 | 2.8 |
| S7 | RP17 | DxT | 1 | 5 | 1 | 1 | 2.7 |
| S7 | RP17 | DxT | 1 | 5 | 2 | 2 | 2.8 |
| S7 | RP17 | DxT | 1 | 5 | 2 | 3 | 2.6 |
| S7 | RP17 | DxT | 1 | 5 | 2 | 1 | 2.8 |
| S7 | RP17 | DxT | 2 | 5 | 1 | 2 | 2.8 |
| S7 | RP17 | DxT | 2 | 5 | 1 | 3 | 2.9 |
| S7 | RP17 | DxT | 2 | 5 | 1 | 1 | 2.9 |
| S7 | RP17 | DxT | 2 | 2 | 2 | 2 | 2.8 |
| S7 | RP17 | DxT | 2 | 2 | 2 | 3 | 2.9 |
| S7 | RP17 | DxT | 2 | 2 | 2 | 1 | 2.9 |
| S7 | RP17 | DxT | 1 | 2 | 2 | 2 | 3 |
| S7 | RP17 | DxT | 1 | 2 | 2 | 3 | 2.9 |
| S7 | RP17 | DxT | 1 | 2 | 2 | 1 | 2.9 |
| S7 | RP17 | DxT | 2 | 5 | 2 | 2 | 2.6 |
| S7 | RP17 | DxT | 2 | 5 | 2 | 3 | 2.6 |
| S7 | RP17 | DxT | 2 | 5 | 2 | 1 | 2.6 |
| S7 | RP17 | DxT | 1 | 4 | 1 | 2 | 3 |
| S7 | RP17 | DxT | 1 | 4 | 1 | 3 | 2.7 |
| S7 | RP17 | DxT | 1 | 4 | 1 | 1 | 2.9 |
| S7 | RP17 | DxT | 1 | 1 | 2 | 2 | 2.9 |
| S7 | RP17 | DxT | 1 | 1 | 2 | 3 | 2.8 |
| S7 | RP17 | DxT | 1 | 1 | 2 | 1 | 3.1 |
| S7 | RP17 | DxT | 2 | 3 | 1 | 1 | 2.8 |
| S7 | RP17 | MedF | 2 | 3 | 1 | 2 | 3.4 |
| S7 | RP17 | MedF | 2 | 3 | 1 | 3 | 3.5 |
| S7 | RP17 | MedF | 2 | 3 | 1 | 1 | 3.5 |
| S7 | RP17 | MedF | 1 | 3 | 1 | 2 | 3.1 |
| S7 | RP17 | MedF | 1 | 3 | 1 | 3 | 3.2 |
| S7 | RP17 | MedF | 1 | 3 | 1 | 1 | 4 |
| S7 | RP17 | MedF | 2 | 2 | 1 | 2 | 3 |
| S7 | RP17 | MedF | 2 | 2 | 1 | 3 | 2.7 |
| S7 | RP17 | MedF | 2 | 2 | 1 | 1 | 3.2 |
| S7 | RP17 | MedF | 1 | 2 | 1 | 2 | 3.3 |
| S7 | RP17 | MedF | 1 | 2 | 1 | 3 | 2.9 |
| S7 | RP17 | MedF | 1 | 2 | 1 | 1 | 3.1 |
| S7 | RP17 | MedF | 1 | 4 | 1 | 2 | 3.3 |
| S7 | RP17 | MedF | 1 | 4 | 1 | 3 | 4.7 |
| S7 | RP17 | MedF | 1 | 4 | 1 | 1 | 3.5 |
| S7 | RP17 | MedF | 2 | 4 | 1 | 2 | 3.4 |
| S7 | RP17 | MedF | 2 | 4 | 1 | 3 | 3.2 |
| S7 | RP17 | MedF | 2 | 4 | 1 | 1 | 3.6 |
| S7 | RP17 | MedF | 1 | 5 | 1 | 2 | 3.5 |
| S7 | RP17 | MedF | 1 | 5 | 1 | 3 | 3.6 |
| S7 | RP17 | MedF | 1 | 5 | 1 | 1 | 3.3 |
| S7 | RP17 | MedF | 2 | 5 | 1 | 2 | 3.1 |
| S7 | RP17 | MedF | 2 | 5 | 1 | 3 | 2.7 |
| S7 | RP17 | MedF | 2 | 5 | 1 | 1 | 3.7 |
| S7 | RP17 | MedF | 1 | 1 | 1 | 2 | 2.9 |
| S7 | RP17 | MedF | 1 | 1 | 1 | 3 | 2.8 |
| S7 | RP17 | MedF | 1 | 1 | 1 | 1 | 3.1 |
| S7 | RP17 | MedF | 2 | 1 | 1 | 2 | 3 |
| S7 | RP17 | MedF | 2 | 1 | 1 | 3 | 2.9 |
| S7 | RP17 | MedF | 2 | 1 | 1 | 1 | 2.8 |
| S8 | RP1 | DxT | 1 | 1 | 1 | 2 | 3.1 |
| S8 | RP1 | DxT | 1 | 1 | 1 | 1 | 3 |
| S8 | RP1 | DxT | 1 | 1 | 1 | 3 | 3 |
| S8 | RP1 | DxT | 2 | 1 | 1 | 2 | 3.1 |
| S8 | RP1 | DxT | 2 | 1 | 1 | 1 | 3.3 |
| S8 | RP1 | DxT | 2 | 1 | 1 | 3 | 3.2 |
| S8 | RP1 | Kashi | 1 | 1 | 1 | 2 | 2.9 |
| S8 | RP1 | Kashi | 1 | 1 | 1 | 1 | 3 |
| S8 | RP1 | Kashi | 1 | 1 | 1 | 3 | 3 |
| S8 | RP1 | Kashi | 1 | 2 | 1 | 2 | 3.3 |
| S8 | RP1 | Kashi | 1 | 2 | 1 | 1 | 3.3 |
| S8 | RP1 | Kashi | 1 | 2 | 1 | 3 | 3.1 |
| S8 | RP1 | Kashi | 2 | 1 | 1 | 2 | 3.3 |
| S8 | RP1 | Kashi | 2 | 1 | 1 | 1 | 3.8 |
| S8 | RP1 | Kashi | 2 | 1 | 1 | 3 | 3.3 |
| S8 | RP1 | Kashi | 2 | 2 | 1 | 2 | 3.1 |
| S8 | RP1 | Kashi | 2 | 2 | 1 | 1 | 3 |
| S8 | RP1 | Kashi | 2 | 2 | 1 | 3 | 3.2 |
| S8 | RP1 | DxT | 2 | 2 | 1 | 2 | 3.1 |
| S8 | RP1 | DxT | 2 | 2 | 1 | 1 | 3.3 |
| S8 | RP1 | DxT | 2 | 2 | 1 | 3 | 3.1 |
| S8 | RP1 | DxT | 1 | 2 | 1 | 2 | 3.1 |
| S8 | RP1 | DxT | 1 | 2 | 1 | 1 | 3.1 |
| S8 | RP1 | DxT | 1 | 2 | 1 | 3 | 3 |
| S8 | RP1 | DxT | 2 | 1 | 2 | 2 | 3.4 |
| S8 | RP1 | DxT | 2 | 1 | 2 | 1 | 3.3 |
| S8 | RP1 | DxT | 2 | 1 | 2 | 3 | 3.4 |
| S8 | RP1 | DxT | 1 | 3 | 1 | 2 | 3.2 |
| S8 | RP1 | DxT | 1 | 3 | 1 | 1 | 3.1 |
| S8 | RP1 | DxT | 1 | 3 | 1 | 3 | 2.8 |
| S8 | RP1 | DxT | 1 | 3 | 2 | 2 | 3.1 |
| S8 | RP1 | DxT | 1 | 3 | 2 | 1 | 3.2 |
| S8 | RP1 | DxT | 1 | 3 | 2 | 3 | 3.1 |
| S8 | RP1 | DxT | 2 | 3 | 1 | 2 | 3.2 |
| S8 | RP1 | DxT | 2 | 3 | 1 | 1 | 3.4 |
| S8 | RP1 | DxT | 2 | 3 | 1 | 3 | 3.2 |
| S8 | RP1 | DxT | 2 | 3 | 2 | 2 | 3.2 |
| S8 | RP1 | DxT | 2 | 3 | 2 | 1 | 3.1 |
| S8 | RP1 | DxT | 2 | 3 | 2 | 3 | 3.3 |
| S8 | RP1 | Kashi | 1 | 3 | 1 | 2 | 3.3 |
| S8 | RP1 | Kashi | 1 | 3 | 1 | 1 | 3 |
| S8 | RP1 | Kashi | 1 | 3 | 1 | 3 | 3.1 |
| S8 | RP1 | Kashi | 1 | 4 | 1 | 2 | 3.3 |
| S8 | RP1 | Kashi | 1 | 4 | 1 | 1 | 4 |
| S8 | RP1 | Kashi | 1 | 4 | 1 | 3 | 3 |
| S8 | RP1 | Kashi | 1 | 5 | 1 | 2 | 3.2 |
| S8 | RP1 | Kashi | 1 | 5 | 1 | 1 | 3.2 |
| S8 | RP1 | Kashi | 1 | 5 | 1 | 3 | 3 |
| S8 | RP1 | Kashi | 2 | 3 | 1 | 2 | 3.1 |
| S8 | RP1 | Kashi | 2 | 3 | 1 | 1 | 3.1 |
| S8 | RP1 | Kashi | 2 | 3 | 1 | 3 | 3.1 |
| S8 | RP1 | Kashi | 2 | 4 | 1 | 2 | 3 |
| S8 | RP1 | Kashi | 2 | 4 | 1 | 1 | 2.6 |
| S8 | RP1 | Kashi | 2 | 4 | 1 | 3 | 2.8 |
| S8 | RP1 | Kashi | 2 | 5 | 1 | 2 | 3.4 |
| S8 | RP1 | Kashi | 2 | 5 | 1 | 1 | 3.4 |
| S8 | RP1 | Kashi | 2 | 5 | 1 | 3 | 3.3 |
| S8 | RP1 | DxT | 2 | 4 | 1 | 2 | 3.2 |
| S8 | RP1 | DxT | 2 | 4 | 1 | 1 | 3.3 |
| S8 | RP1 | DxT | 2 | 4 | 1 | 3 | 3 |
| S8 | RP1 | DxT | 2 | 4 | 2 | 2 | 3.2 |
| S8 | RP1 | DxT | 2 | 4 | 2 | 1 | 3.4 |
| S8 | RP1 | DxT | 2 | 4 | 2 | 3 | 3.2 |
| S8 | RP1 | DxT | 1 | 4 | 2 | 2 | 3 |
| S8 | RP1 | DxT | 1 | 4 | 2 | 1 | 3.2 |
| S8 | RP1 | DxT | 1 | 4 | 2 | 3 | 3.2 |
| S8 | RP1 | DxT | 1 | 5 | 1 | 2 | 3 |
| S8 | RP1 | DxT | 1 | 5 | 1 | 1 | 2.8 |
| S8 | RP1 | DxT | 1 | 5 | 1 | 3 | 3.1 |
| S8 | RP1 | DxT | 1 | 5 | 2 | 2 | 3.3 |
| S8 | RP1 | DxT | 1 | 5 | 2 | 1 | 3.4 |
| S8 | RP1 | DxT | 1 | 5 | 2 | 3 | 3 |
| S8 | RP1 | DxT | 2 | 5 | 1 | 2 | 3.1 |
| S8 | RP1 | DxT | 2 | 5 | 1 | 1 | 3.3 |
| S8 | RP1 | DxT | 2 | 5 | 1 | 3 | 3 |
| S8 | RP1 | DxT | 2 | 2 | 2 | 2 | 3.5 |
| S8 | RP1 | DxT | 2 | 2 | 2 | 1 | 3.3 |
| S8 | RP1 | DxT | 2 | 2 | 2 | 3 | 3.4 |
| S8 | RP1 | DxT | 1 | 2 | 2 | 2 | 3.3 |
| S8 | RP1 | DxT | 1 | 2 | 2 | 1 | 3.2 |
| S8 | RP1 | DxT | 1 | 2 | 2 | 3 | 3.5 |
| S8 | RP1 | DxT | 2 | 5 | 2 | 2 | 3 |
| S8 | RP1 | DxT | 2 | 5 | 2 | 1 | 3.3 |
| S8 | RP1 | DxT | 2 | 5 | 2 | 3 | 3 |
| S8 | RP1 | DxT | 1 | 4 | 1 | 2 | 3.2 |
| S8 | RP1 | DxT | 1 | 4 | 1 | 1 | 3.3 |
| S8 | RP1 | DxT | 1 | 4 | 1 | 3 | 3.2 |
| S8 | RP1 | DxT | 1 | 1 | 2 | 2 | 3.1 |
| S8 | RP1 | DxT | 1 | 1 | 2 | 1 | 3.5 |
| S8 | RP1 | DxT | 1 | 1 | 2 | 3 | 3.1 |
| S8 | RP1 | MedF | 2 | 3 | 1 | 2 | 3.1 |
| S8 | RP1 | MedF | 2 | 3 | 1 | 1 | 3.5 |
| S8 | RP1 | MedF | 2 | 3 | 1 | 3 | 3.4 |
| S8 | RP1 | MedF | 1 | 3 | 1 | 2 | 3.3 |
| S8 | RP1 | MedF | 1 | 3 | 1 | 1 | 3.1 |
| S8 | RP1 | MedF | 1 | 3 | 1 | 3 | 3.3 |
| S8 | RP1 | MedF | 2 | 2 | 1 | 2 | 3.5 |
| S8 | RP1 | MedF | 2 | 2 | 1 | 1 | 3.3 |
| S8 | RP1 | MedF | 2 | 2 | 1 | 3 | 3.4 |
| S8 | RP1 | MedF | 1 | 2 | 1 | 2 | 3 |
| S8 | RP1 | MedF | 1 | 2 | 1 | 1 | 2.7 |
| S8 | RP1 | MedF | 1 | 2 | 1 | 3 | 3.4 |
| S8 | RP1 | MedF | 1 | 4 | 1 | 2 | 3.1 |
| S8 | RP1 | MedF | 1 | 4 | 1 | 1 | 3.2 |
| S8 | RP1 | MedF | 1 | 4 | 1 | 3 | 3.3 |
| S8 | RP1 | MedF | 2 | 4 | 1 | 2 | 3.5 |
| S8 | RP1 | MedF | 2 | 4 | 1 | 1 | 3.1 |
| S8 | RP1 | MedF | 2 | 4 | 1 | 3 | 4.1 |
| S8 | RP1 | MedF | 1 | 5 | 1 | 2 | 3.3 |
| S8 | RP1 | MedF | 1 | 5 | 1 | 1 | 4.3 |
| S8 | RP1 | MedF | 1 | 5 | 1 | 3 | 3.3 |
| S8 | RP1 | MedF | 2 | 5 | 1 | 2 | 3.4 |
| S8 | RP1 | MedF | 2 | 5 | 1 | 1 | 3.3 |
| S8 | RP1 | MedF | 2 | 5 | 1 | 3 | 3.4 |
| S8 | RP1 | MedF | 1 | 1 | 1 | 2 | 3 |
| S8 | RP1 | MedF | 1 | 1 | 1 | 1 | 3.5 |
| S8 | RP1 | MedF | 1 | 1 | 1 | 3 | 2.9 |
| S8 | RP1 | MedF | 2 | 1 | 1 | 2 | 3 |
| S8 | RP1 | MedF | 2 | 1 | 1 | 1 | 2.9 |
| S8 | RP1 | MedF | 2 | 1 | 1 | 3 | 2.6 |
| S9 | RP20 | DxT | 1 | 1 | 1 | 2 | 3 |
| S9 | RP20 | DxT | 1 | 1 | 1 | 3 | 3.2 |
| S9 | RP20 | DxT | 1 | 1 | 1 | 1 | 3.1 |
| S9 | RP20 | DxT | 2 | 1 | 1 | 2 | 3.1 |
| S9 | RP20 | DxT | 2 | 1 | 1 | 3 | 3.2 |
| S9 | RP20 | DxT | 2 | 1 | 1 | 1 | 3.3 |
| S9 | RP20 | Kashi | 1 | 1 | 1 | 3 | 3 |
| S9 | RP20 | Kashi | 1 | 1 | 1 | 1 | 3.4 |
| S9 | RP20 | Kashi | 1 | 1 | 1 | 2 | 3 |
| S9 | RP20 | Kashi | 1 | 2 | 1 | 3 | 3.2 |
| S9 | RP20 | Kashi | 1 | 2 | 1 | 1 | 3.4 |
| S9 | RP20 | Kashi | 1 | 2 | 1 | 2 | 3.6 |
| S9 | RP20 | Kashi | 2 | 1 | 1 | 3 | 3.3 |
| S9 | RP20 | Kashi | 2 | 1 | 1 | 1 | 3.6 |
| S9 | RP20 | Kashi | 2 | 1 | 1 | 2 | 3.7 |
| S9 | RP20 | Kashi | 2 | 2 | 1 | 3 | 3 |
| S9 | RP20 | Kashi | 2 | 2 | 1 | 1 | 3.4 |
| S9 | RP20 | Kashi | 2 | 2 | 1 | 2 | 2.7 |
| S9 | RP20 | DxT | 2 | 2 | 1 | 2 | 3.2 |
| S9 | RP20 | DxT | 2 | 2 | 1 | 3 | 3.1 |
| S9 | RP20 | DxT | 2 | 2 | 1 | 1 | 3.1 |
| S9 | RP20 | DxT | 1 | 2 | 1 | 2 | 3.2 |
| S9 | RP20 | DxT | 1 | 2 | 1 | 3 | 2.7 |
| S9 | RP20 | DxT | 1 | 2 | 1 | 1 | 3.1 |
| S9 | RP20 | DxT | 2 | 1 | 2 | 2 | 3.1 |
| S9 | RP20 | DxT | 2 | 1 | 2 | 3 | 3.2 |
| S9 | RP20 | DxT | 2 | 1 | 2 | 1 | 3.3 |
| S9 | RP20 | DxT | 1 | 3 | 1 | 2 | 3.1 |
| S9 | RP20 | DxT | 1 | 3 | 1 | 3 | 2.8 |
| S9 | RP20 | DxT | 1 | 3 | 1 | 1 | 3 |
| S9 | RP20 | DxT | 1 | 3 | 2 | 2 | 3.1 |
| S9 | RP20 | DxT | 1 | 3 | 2 | 3 | 3.3 |
| S9 | RP20 | DxT | 1 | 3 | 2 | 1 | 3.5 |
| S9 | RP20 | DxT | 2 | 3 | 1 | 2 | 3 |
| S9 | RP20 | DxT | 2 | 3 | 1 | 3 | 3.1 |
| S9 | RP20 | DxT | 2 | 3 | 1 | 1 | 3.8 |
| S9 | RP20 | DxT | 2 | 3 | 2 | 2 | 3.1 |
| S9 | RP20 | DxT | 2 | 3 | 2 | 3 | 3.4 |
| S9 | RP20 | DxT | 2 | 3 | 2 | 1 | 3.2 |
| S9 | RP20 | Kashi | 1 | 3 | 1 | 3 | 2.8 |
| S9 | RP20 | Kashi | 1 | 3 | 1 | 1 | 2.9 |
| S9 | RP20 | Kashi | 1 | 3 | 1 | 2 | 3.3 |
| S9 | RP20 | Kashi | 1 | 4 | 1 | 3 | 3.4 |
| S9 | RP20 | Kashi | 1 | 4 | 1 | 1 | 3.5 |
| S9 | RP20 | Kashi | 1 | 4 | 1 | 2 | 3.6 |
| S9 | RP20 | Kashi | 1 | 5 | 1 | 3 | 3.4 |
| S9 | RP20 | Kashi | 1 | 5 | 1 | 1 | 3.4 |
| S9 | RP20 | Kashi | 1 | 5 | 1 | 2 | 3.4 |
| S9 | RP20 | Kashi | 2 | 3 | 1 | 3 | 0.6 |
| S9 | RP20 | Kashi | 2 | 3 | 1 | 1 | 3.1 |
| S9 | RP20 | Kashi | 2 | 3 | 1 | 2 | 3.4 |
| S9 | RP20 | Kashi | 2 | 4 | 1 | 3 | 2.9 |
| S9 | RP20 | Kashi | 2 | 4 | 1 | 1 | 3 |
| S9 | RP20 | Kashi | 2 | 4 | 1 | 2 | 3.1 |
| S9 | RP20 | Kashi | 2 | 5 | 1 | 3 | 3.7 |
| S9 | RP20 | Kashi | 2 | 5 | 1 | 1 | 3.3 |
| S9 | RP20 | Kashi | 2 | 5 | 1 | 2 | 3.5 |
| S9 | RP20 | DxT | 2 | 4 | 1 | 2 | 2.9 |
| S9 | RP20 | DxT | 2 | 4 | 1 | 3 | 2.9 |
| S9 | RP20 | DxT | 2 | 4 | 1 | 1 | 2.6 |
| S9 | RP20 | DxT | 2 | 4 | 2 | 2 | 3.2 |
| S9 | RP20 | DxT | 2 | 4 | 2 | 3 | 3.2 |
| S9 | RP20 | DxT | 2 | 4 | 2 | 1 | 2.8 |
| S9 | RP20 | DxT | 1 | 4 | 2 | 2 | 3.1 |
| S9 | RP20 | DxT | 1 | 4 | 2 | 3 | 3.1 |
| S9 | RP20 | DxT | 1 | 4 | 2 | 1 | 3 |
| S9 | RP20 | DxT | 1 | 5 | 1 | 2 | 3 |
| S9 | RP20 | DxT | 1 | 5 | 1 | 3 | 3.4 |
| S9 | RP20 | DxT | 1 | 5 | 1 | 1 | 3.1 |
| S9 | RP20 | DxT | 1 | 5 | 2 | 2 | 3.3 |
| S9 | RP20 | DxT | 1 | 5 | 2 | 3 | 3.1 |
| S9 | RP20 | DxT | 1 | 5 | 2 | 1 | 3.5 |
| S9 | RP20 | DxT | 2 | 5 | 1 | 2 | 3.1 |
| S9 | RP20 | DxT | 2 | 5 | 1 | 3 | 2.9 |
| S9 | RP20 | DxT | 2 | 5 | 1 | 1 | 3.3 |
| S9 | RP20 | DxT | 2 | 2 | 2 | 2 | 3.1 |
| S9 | RP20 | DxT | 2 | 2 | 2 | 3 | 3.3 |
| S9 | RP20 | DxT | 2 | 2 | 2 | 1 | 3.1 |
| S9 | RP20 | DxT | 1 | 2 | 2 | 2 | 3.5 |
| S9 | RP20 | DxT | 1 | 2 | 2 | 3 | 3.4 |
| S9 | RP20 | DxT | 1 | 2 | 2 | 1 | 3.6 |
| S9 | RP20 | DxT | 2 | 5 | 2 | 2 | 2.9 |
| S9 | RP20 | DxT | 2 | 5 | 2 | 3 | 3 |
| S9 | RP20 | DxT | 2 | 5 | 2 | 1 | 3.2 |
| S9 | RP20 | DxT | 1 | 4 | 1 | 2 | 3.2 |
| S9 | RP20 | DxT | 1 | 4 | 1 | 3 | 3.2 |
| S9 | RP20 | DxT | 1 | 4 | 1 | 1 | 3 |
| S9 | RP20 | DxT | 1 | 1 | 2 | 2 | 3.4 |
| S9 | RP20 | DxT | 1 | 1 | 2 | 3 | 3.3 |
| S9 | RP20 | DxT | 1 | 1 | 2 | 1 | 3.2 |
| S9 | RP20 | MedF | 2 | 3 | 1 | 2 | 3.7 |
| S9 | RP20 | MedF | 2 | 3 | 1 | 3 | 3.2 |
| S9 | RP20 | MedF | 2 | 3 | 1 | 1 | 3.3 |
| S9 | RP20 | MedF | 1 | 3 | 1 | 2 | 3.2 |
| S9 | RP20 | MedF | 1 | 3 | 1 | 3 | 3.5 |
| S9 | RP20 | MedF | 1 | 3 | 1 | 1 | 3.2 |
| S9 | RP20 | MedF | 2 | 2 | 1 | 2 | 3.1 |
| S9 | RP20 | MedF | 2 | 2 | 1 | 3 | 3.3 |
| S9 | RP20 | MedF | 2 | 2 | 1 | 1 | 4.7 |
| S9 | RP20 | MedF | 1 | 2 | 1 | 2 | 3.1 |
| S9 | RP20 | MedF | 1 | 2 | 1 | 3 | 3 |
| S9 | RP20 | MedF | 1 | 2 | 1 | 1 | 3.1 |
| S9 | RP20 | MedF | 1 | 4 | 1 | 2 | 3.3 |
| S9 | RP20 | MedF | 1 | 4 | 1 | 3 | 3.6 |
| S9 | RP20 | MedF | 1 | 4 | 1 | 1 | 3.4 |
| S9 | RP20 | MedF | 2 | 4 | 1 | 2 | 3.5 |
| S9 | RP20 | MedF | 2 | 4 | 1 | 3 | 3.3 |
| S9 | RP20 | MedF | 2 | 4 | 1 | 1 | 3.7 |
| S9 | RP20 | MedF | 1 | 5 | 1 | 2 | 2.9 |
| S9 | RP20 | MedF | 1 | 5 | 1 | 3 | 3.3 |
| S9 | RP20 | MedF | 1 | 5 | 1 | 1 | 3.2 |
| S9 | RP20 | MedF | 2 | 5 | 1 | 2 | 3 |
| S9 | RP20 | MedF | 2 | 5 | 1 | 3 | 2.6 |
| S9 | RP20 | MedF | 2 | 5 | 1 | 1 | 3 |
| S9 | RP20 | MedF | 1 | 1 | 1 | 2 | 3.2 |
| S9 | RP20 | MedF | 1 | 1 | 1 | 3 | 2.8 |
| S9 | RP20 | MedF | 1 | 1 | 1 | 1 | 3 |
| S9 | RP20 | MedF | 2 | 1 | 1 | 2 | 2.6 |
| S9 | RP20 | MedF | 2 | 1 | 1 | 3 | 2.6 |
| S9 | RP20 | MedF | 2 | 1 | 1 | 1 | 3.3 |

Table K. REDI-Dx Dose Estimates for Reproducibility and Repeatability Data shown in Table H


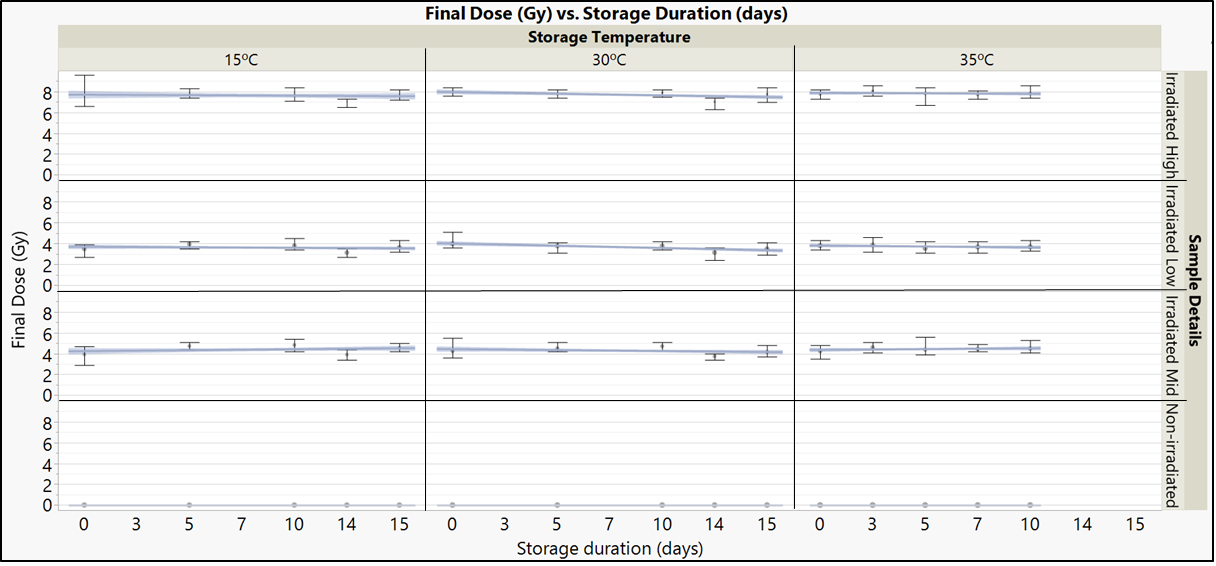


Figure A. Stability of Samples after collection in DxCollect BCTs. The test time points for the storage temperatures are: **15°C and 30°C**-0, 5, 10, 14, 15 days, **35°C-**0, 3, 5, 7, 10 days
